# Supplementary material for: Nineteenth century French rose (Rosa sp.) germplasm shows a shift over time from a European to an Asian genetic background
Source: PubMed Central journal article supplement (PMC4973750; doi:10.1093/jxb/erw269), 2016-07-12
Supplement: supp_erw269_supplementary_figures_S1_S2_Tables_S3_S7.pdf [file supp_erw269_supplementary_figures_S1_S2_Tables_S3_S7.pdf]

Article title: Nineteenth century French rose (*Rosa* sp.) germplasm shows a shift over time from a European to an Asian genetic background

Authors: Mathilde LIORZOU, Alix PERNET, Shubin LI, Annie CHASTELLIER, Tatiana THOUROUDE, Gilles MICHEL, Valéry MALECOT, Cristiana OGHINA-PAVIE, Céline BRIEE, Fabrice FOUCHER, Jérémy CLOTAULT, Agnès GRAPIN

The following Supporting Information is available for this article:

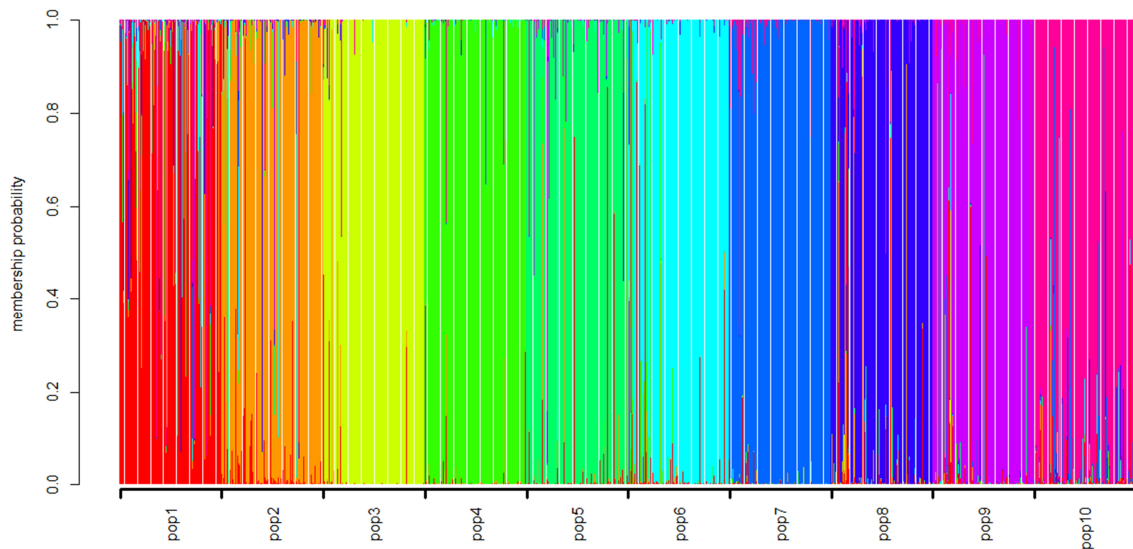

**Fig S1 Membership probability, obtained by DAPC analysis, of simulated individuals classified according their original subpopulation (“pop1” to “pop10”).** For each subpopulation, 100 simulated individuals are depicted according the following order: 20 diploids, 20 triploids, 20 tetraploids, 20 pentaploids and 20 hexaploids. Each color in the plot represents the membership to a given genetic cluster, determined by DAPC.

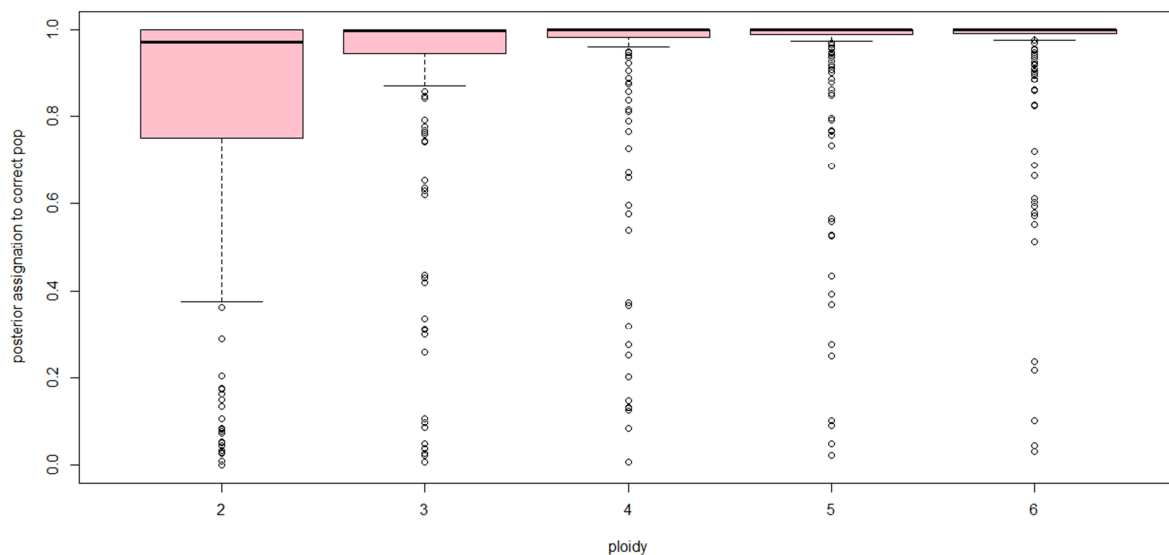

**Fig S2 Boxplot for correct assignment of simulated individuals according to their ploidy level.** Whatever their original subpopulation, simulated individuals are represented on the x-axis according to their ploidy level. The membership probability for the correct original subpopulation is represented in the y-axis. The box represents the interquartile range (IQR) and the bold trait is the median. The lower whisker represents first quartile - 1,5 IQR. Points are outliers.

## Notes S1 Historical sources

The following historical sources were used to check the date of breeding of the different cultivars studied.

**Boitard P. 1836.** *Manuel de l'amateur de roses leur monographie, leur histoire et leur culture par M. Boitard.* Paris, France: Roret.

**Bosc d'Antic L-A. 1809.** Rosier. In : Thouin, Tessier, Huzard, Silvestre, Bosc, Yvart, Chassiron, Chaptal, De Lacroix, De Perthuis et al. *Nouveau cours complet d'agriculture théorique et pratique, contenant la grande et la petite culture, l'Economie rurale et domestique, la médecine vétérinaire, etc. ou Dictionnaire raisonné et universel d'agriculture.* Paris, France: Déterville, 237–266.

**Calvert. 1821.** *Catalogue of Roses cultivated at Calvert and Company's Nursery.* Rouen, France: Bonne nouvelle.

**Cochet P. 1877.** *Journal des roses (Rosa inter Flores) Publication mensuelle spéciale fondée par M.S. Cochet horticulteur rosiériste.* Melun, France.

**Cochet P, Mottet S. 1909.** *Les Rosiers, historique, classification, nomenclature, description, culture.* Paris, France: Doin.

**Desportes N. 1829.** *Roses cultivées en France au nombre de 2562 espèces ou variétés avec la synonymie française et latine.* Le Mans, France: Pesche.

**Graveraux J. 1902.** *Roseaie de l'Haÿ (Seine): les roses cultivées à l'Haÿ en 1902 ; essai de classement avant-propos de André Theuriet.* Paris, France: Cochet-Rousset.

**Graveraux J. 1912.** *La Malmaison. Les Roses de l'Impératrice Joséphine.* Paris, France: Editions d'art et de littérature.

**Guillemeau J-L-M. 1800.** *Histoire naturelle de la rose: où l'on décrit ses différentes espèces, sa culture, ses vertus et ses propriétés; suivie de la corbeille de roses, ou choix de ce que les anciens et les modernes ont écrit de plus gracieux sur la rose; et de l'histoire des insectes qui vivent sur le rosier.* Paris, France: Vatar-Jouannet.

**Lindley J. 1820.** *Rosarum Monographia; Or, A Botanical History of Roses. To Which is Added an Appendix for the Use of Cultivators, in Which the Most Remarkable Garden Varieties are Systematically Arranged.* London: Ridgeway.

**Lindley J. 1824.** *Monographie du genre rosier: traduite de l'anglais de M. J. Lindley, avec des notes de M. L. Joffrin, et des changements importants, suivie d'un appendice sur les roses cultivées dans les jardins de Paris et environs par M. de Pronville.* Paris, France: Audot.

**Noisette LC. 1825.** *Catalogue des rosiers, dahlia, camellia, chrysanthèmes et paeonia cultivés dans les jardins et pépinières.* Paris, France: Rousselon; Mme Huzard.

**Noisette L. 1826.** *Catalogue général des arbres, arbustes et plantes, tant de serre que de pleine terre, cultivés dans les jardins et pépinières de L. Noisette.* Paris, France: Rousselon-Huzard.

**Prevost. 1829.** *Catalogue descriptif, méthodique et raisonné, des espèces, variétés et sous-variétés du genre rosier, cultivées chez Prevost fils pépiniériste à Rouen.* Rouen, France: Nicéas Périaux le Jeune.

**Pronville A de. 1818.** *Nomenclature raisonnée des espèces, variétés et sous-variétés du genre Rosier: observées au Jardin royal des plantes, dans ceux de Trianon, de Malmaison, et dans les pépinières des environs de Paris.* Paris, France: Huzard.

**Redouté P-J, Thory C-A. 1817.** *Les Roses.* Paris, France: Firmin Didot.

**Rivers T. 1863.** *Catalogue of Roses Edition for Autumn 1863, Thirtieth Edition & Descriptive Catalogue of Selected Roses cultivated for sale by Thomas Rivers & Son, Sawbridgeworth, Herts.* London, UK: Taylor.

**Simon L, Cochet P. 1899.** *Nomenclature de tous les noms de roses connus, avec indication de leurs races, obtenteur, année de production, couleur et synonymes.* Metz, France: Béha.

**Singer M. 1885.** *Dictionnaire des roses, ou, Guide général du rosieriste.* Tournai, Belgique: Author.

**SNHF. 1827.** *Annales de la société d'horticulture de Paris et journal spécial de l'état et des progrès du jardinage.* Paris, France: SNHF.

**Souchet C-D. 1846.** *Catalogue et prix-courant pour l'année 1846, à l'Etablissement horticole de Souchet Fils.* Versailles, France: Klefer.

**Vibert J-P. 1824.** *Observations sur la nomenclature et le classement des rosiers, suivies du catalogue de celles cultivées par J-P. Vibert à Chennevières-sur-Marne.* Paris, France: Huzard.

**Vibert J-P. 1831.** *Observations sur la nomenclature et le classement des rosiers, suivies du catalogue de celles cultivées par J-P. Vibert à Saint-Denis (Seine).* Paris, France: Huzard.

**Table S1: Rose Garden Addresses**

| <b>Garden</b>                    | <b>Address</b>                          | <b>Post code</b> | <b>Town</b>           | <b>Country</b> |
|----------------------------------|-----------------------------------------|------------------|-----------------------|----------------|
| Loubert rose garden              | 11, rue de la société                   | 49350            | Les Rosiers-sur-Loire | France         |
| Val de Marne rose garden         | Rue Albert Watel                        | 94240            | L'Haÿ-les-Roses       | France         |
| La Cour de Commer rose garden    | La Cour                                 | 53470            | Commer                | France         |
| Jumaju rose garden               | Les Fieffes                             | 14350            | Montchamp             | France         |
| Jardin botanique de la Tête d'Or |                                         | 69006            | Lyon                  | France         |
| Désert rose garden               | Lieu dit 'Panjas'                       | 32290            | Bouzon-Gellenave      | France         |
| Grande roseraie de Lyon          |                                         | 69006            | Lyon                  | France         |
| La Beaujoire rose garden         | Rte. de St Joseph                       | 44000            | Nantes                | France         |
| SCRADH                           | 727 avenue Alfred Décugis               | 83400            | Hyerès                | France         |
| Arboretum des Barres             | Domaine des Barres                      | 45290            | Nogent-sur-Vernisson  | France         |
| Flower Research Institute        | Yunnan Academy of Agricultural Sciences | 650205           | Kunming               | China          |

**Table S3: AMOVA results based on the Dice genetic distances and the genetic groups obtained with DAPC**

| Source of variation | df   | Sum of Square | Mean sum of square | Estimated Variance | % of the variance | P(rand >= data) |
|---------------------|------|---------------|--------------------|--------------------|-------------------|-----------------|
| <b>Between Pops</b> | 15   | 98.14         | 6.54               | 0.09               | 27%               | 0.001           |
| <b>Within Pops</b>  | 1110 | 288.14        | 0.26               | 0.26               | 73%               |                 |
| <b>Total</b>        | 1125 | 386.28        |                    | 0.35               | 100%              |                 |

**Table S4: Pairwise PhiPT values based on the Dice genetic distance and the genetic groups obtained with DAPC**

|              | Grp1 | Grp2 | Grp3 | Grp4 | Grp5 | Grp6 | Grp7 | Grp8 | Grp9 | Grp10 | Grp11 | Grp12 | Grp13 | Grp14 | Grp15 | Grp16 |
|--------------|------|------|------|------|------|------|------|------|------|-------|-------|-------|-------|-------|-------|-------|
| <b>Grp1</b>  |      |      |      |      |      |      |      |      |      |       |       |       |       |       |       |       |
| <b>Grp2</b>  | 0.11 |      |      |      |      |      |      |      |      |       |       |       |       |       |       |       |
| <b>Grp3</b>  | 0.14 | 0.08 |      |      |      |      |      |      |      |       |       |       |       |       |       |       |
| <b>Grp4</b>  | 0.2  | 0.13 | 0.07 |      |      |      |      |      |      |       |       |       |       |       |       |       |
| <b>Grp5</b>  | 0.32 | 0.25 | 0.16 | 0.07 |      |      |      |      |      |       |       |       |       |       |       |       |
| <b>Grp6</b>  | 0.4  | 0.34 | 0.23 | 0.14 | 0.08 |      |      |      |      |       |       |       |       |       |       |       |
| <b>Grp7</b>  | 0.37 | 0.34 | 0.2  | 0.15 | 0.2  | 0.13 |      |      |      |       |       |       |       |       |       |       |
| <b>Grp8</b>  | 0.44 | 0.39 | 0.29 | 0.23 | 0.21 | 0.14 | 0.14 |      |      |       |       |       |       |       |       |       |
| <b>Grp9</b>  | 0.41 | 0.38 | 0.28 | 0.23 | 0.24 | 0.17 | 0.06 | 0.09 |      |       |       |       |       |       |       |       |
| <b>Grp10</b> | 0.27 | 0.27 | 0.16 | 0.14 | 0.19 | 0.17 | 0.05 | 0.16 | 0.11 |       |       |       |       |       |       |       |
| <b>Grp11</b> | 0.54 | 0.46 | 0.36 | 0.38 | 0.45 | 0.44 | 0.29 | 0.38 | 0.28 | 0.17  |       |       |       |       |       |       |
| <b>Grp12</b> | 0.28 | 0.29 | 0.18 | 0.22 | 0.29 | 0.3  | 0.18 | 0.3  | 0.26 | 0.11  | 0.24  |       |       |       |       |       |
| <b>Grp13</b> | 0.41 | 0.38 | 0.29 | 0.32 | 0.41 | 0.41 | 0.29 | 0.4  | 0.34 | 0.2   | 0.34  | 0.12  |       |       |       |       |
| <b>Grp14</b> | 0.43 | 0.35 | 0.26 | 0.29 | 0.37 | 0.38 | 0.31 | 0.39 | 0.35 | 0.21  | 0.41  | 0.17  | 0.29  |       |       |       |
| <b>Grp15</b> | 0.49 | 0.4  | 0.33 | 0.35 | 0.43 | 0.43 | 0.39 | 0.43 | 0.4  | 0.26  | 0.46  | 0.21  | 0.35  | 0.23  |       |       |
| <b>Grp16</b> | 0.6  | 0.38 | 0.35 | 0.39 | 0.48 | 0.49 | 0.5  | 0.49 | 0.46 | 0.32  | 0.62  | 0.3   | 0.46  | 0.46  | 0.42  |       |

PhiPT values below diagonal, all probability (based on 1000 permutations) were  $\leq 0.001$ .

In grey: PhiPT < 0.2, less differentiated genetic groups

**Table S5: AMOVA results based on the Dice genetic distances, the European pool divided in 13 temporal classes and the Asian pool.**

| Source of variation  | df  | Sum of Square | Mean sum of square | Estimated Variance | % of the variance | P(rand >= data) |
|----------------------|-----|---------------|--------------------|--------------------|-------------------|-----------------|
| <b>Among Regions</b> | 1   | 3.17          | 3.17               | 0.01               | 2%                | 0.001           |
| <b>Among Pops</b>    | 12  | 21.37         | 1.78               | 0.02               | 6%                | 0.001           |
| <b>Within Pops</b>   | 963 | 306.15        | 0.32               | 0.32               | 92%               |                 |
| <b>Total</b>         | 976 | 330.69        |                    | 0.34               | 100%              |                 |

**Table S6: AMOVA results based on the Dice genetic distances and the horticultural groups**

| Source of variation | df   | Sum of Square | Mean sum of square | Estimated Variance | % of the variance | P(rand >= data) |
|---------------------|------|---------------|--------------------|--------------------|-------------------|-----------------|
| Among Pops          | 17   | 64.75         | 3.81               | 0.06               | 17%               | 0.001           |
| Within Pops         | 1108 | 321.53        | 0.29               | 0.29               | 83%               |                 |
| Total               | 1125 | 386.28        |                    | 0.35               | 100%              |                 |

**Table S7: Pairwise PhiPT values based on the Dice genetic distance and the horticultural groups**

|         | nSSWG | MPD  | T    | Ch   | HT   | Pol  | HWich | N    | B    | intersp | HMult | HP   | HRg  | A    | D    | HGal | C    | M    | Sp   | Others |
|---------|-------|------|------|------|------|------|-------|------|------|---------|-------|------|------|------|------|------|------|------|------|--------|
| T       | 0.28  | 0.20 |      |      |      |      |       |      |      |         |       |      |      |      |      |      |      |      |      |        |
| Ch      | 0.36  | 0.20 | 0.12 |      |      |      |       |      |      |         |       |      |      |      |      |      |      |      |      |        |
| HT      | 0.22  | 0.18 | 0.09 | 0.16 |      |      |       |      |      |         |       |      |      |      |      |      |      |      |      |        |
| Pol     | 0.25  | 0.17 | 0.16 | 0.14 | 0.19 |      |       |      |      |         |       |      |      |      |      |      |      |      |      |        |
| HWich   | 0.23  | 0.20 | 0.25 | 0.24 | 0.25 | 0.14 |       |      |      |         |       |      |      |      |      |      |      |      |      |        |
| N       | 0.26  | 0.14 | 0.08 | 0.08 | 0.08 | 0.11 | 0.19  |      |      |         |       |      |      |      |      |      |      |      |      |        |
| B       | 0.26  | 0.17 | 0.18 | 0.15 | 0.09 | 0.20 | 0.26  | 0.07 |      |         |       |      |      |      |      |      |      |      |      |        |
| intersp | 0.33  | 0.12 | 0.09 | 0.10 | 0.06 | 0.12 | 0.17  | 0.06 | 0.11 |         |       |      |      |      |      |      |      |      |      |        |
| HMult   | 0.24  | 0.12 | 0.18 | 0.15 | 0.16 | 0.04 | 0.09  | 0.10 | 0.15 | 0.09    |       |      |      |      |      |      |      |      |      |        |
| HP      | 0.33  | 0.16 | 0.23 | 0.19 | 0.12 | 0.22 | 0.26  | 0.13 | 0.05 | 0.12    | 0.15  |      |      |      |      |      |      |      |      |        |
| HRg     | 0.22  | 0.17 | 0.24 | 0.23 | 0.23 | 0.17 | 0.16  | 0.17 | 0.22 | 0.13    | 0.10  | 0.21 |      |      |      |      |      |      |      |        |
| A       | 0.30  | 0.18 | 0.33 | 0.33 | 0.30 | 0.25 | 0.24  | 0.24 | 0.26 | 0.20    | 0.16  | 0.21 | 0.19 |      |      |      |      |      |      |        |
| D       | 0.29  | 0.18 | 0.36 | 0.35 | 0.32 | 0.27 | 0.26  | 0.25 | 0.26 | 0.23    | 0.18  | 0.19 | 0.21 | 0.07 |      |      |      |      |      |        |
| HGal    | 0.29  | 0.20 | 0.36 | 0.34 | 0.31 | 0.30 | 0.29  | 0.28 | 0.27 | 0.26    | 0.21  | 0.20 | 0.26 | 0.10 | 0.04 |      |      |      |      |        |
| C       | 0.28  | 0.19 | 0.35 | 0.34 | 0.31 | 0.28 | 0.28  | 0.24 | 0.24 | 0.24    | 0.19  | 0.17 | 0.23 | 0.11 | 0.02 | 0.06 |      |      |      |        |
| M       | 0.29  | 0.14 | 0.29 | 0.28 | 0.23 | 0.23 | 0.22  | 0.20 | 0.18 | 0.18    | 0.14  | 0.12 | 0.18 | 0.07 | 0.02 | 0.03 | 0.03 |      |      |        |
| Sp      | 0.39  | 0.13 | 0.22 | 0.21 | 0.21 | 0.14 | 0.14  | 0.16 | 0.20 | 0.12    | 0.09  | 0.19 | 0.06 | 0.09 | 0.12 | 0.16 | 0.15 | 0.11 |      |        |
| Others  | 0.24  | 0.09 | 0.15 | 0.13 | 0.11 | 0.09 | 0.11  | 0.08 | 0.10 | 0.05    | 0.04  | 0.09 | 0.08 | 0.08 | 0.09 | 0.12 | 0.10 | 0.07 | 0.04 |        |

PhiPT values below diagonal, all probability (based on 1000 permutations) were  $\leq 0.001$ .

In grey: PhiPT < 0.2, less differentiated horticultural groups
