# Supplementary material for: Nineteenth century French rose (Rosa sp.) germplasm shows a shift over time from a European to an Asian genetic background
Source: PubMed Central journal article supplement (PMC4973750; doi:10.1093/jxb/erw269), 2016-07-12
Supplement: supp_erw269_supplementary_table_S2.pdf [file supp_erw269_supplementary_table_S2.pdf]

Table S2: Informative data about the sample

| Name                               | Origin of the sample             | genetic group | Percentage of assignation | Likely year (years of breeding for bred roses years of introduction for botanical roses) | Classification | Botanical rose | Breeder Family              | Origin        | Ploidy  | Ploidy source |              |
|------------------------------------|----------------------------------|---------------|---------------------------|------------------------------------------------------------------------------------------|----------------|----------------|-----------------------------|---------------|---------|---------------|--------------|
| a_feuilles_de_chanvre              | Val de Marne rose garden         | 16            | 100.0                     | 1810                                                                                     | A              | no             | Flobert                     | France        |         | 6             | Bibliography |
| a_fleurs_rose_de_laffay            | Val de Marne rose garden         | 10            | 90.2                      | 1835                                                                                     | HSem           | no             | Laffay                      | FranceParis   |         | 2             | Bibliography |
| a_longspedoncles                   | La Cour de Commer rose garden    | 15            | 100.0                     | 1854                                                                                     | M              | no             | Robert                      | FranceAngers  |         | 4             | Bibliography |
| abbaye_de_cluny                    | Val de Marne rose garden         | 8             | 50.1                      | 1993                                                                                     | HT             | no             | Meilland                    | FranceSE      |         | 4             | Bibliography |
| abbaye_de_valsaintes               | Grande roseraie de Lyon          | 9             | 46.5                      | 2006                                                                                     | HT             | no             | Dorieux                     | FranceLyon    |         | 4             | Bibliography |
| abbe_duchemin                      | La Cour de Commer rose garden    | 2             | 96.4                      | Unknown                                                                                  | Unknown        | no             | Unknown                     | Unknown       | Unknown | Unknown       | Unknown      |
| abdul_hamid                        | Loubert rose garden              | 10            | 98.6                      | 1901                                                                                     | HRg            | no             | Roseraie de J'Hay-Les-Roses | Unknown       | Unknown | 3             | Measured     |
| adagio                             | Val de Marne rose garden         | 8             | 74.9                      | 1998                                                                                     | HT             | no             | Cocker                      | EuropeN       |         | 4             | Bibliography |
| adam                               | Loubert rose garden              | 9             | 64.2                      | 1838                                                                                     | T              | no             | Adam                        | FranceNW      |         | 2             | Measured     |
| adam_messerich                     | Loubert rose garden              | 6             | 69.2                      | 1920                                                                                     | B              | no             | Lambert                     | EuropeW       |         | 4             | Measured     |
| adelaide_d_orleans                 | Loubert rose garden              | 10            | 96.0                      | 1826                                                                                     | HSem           | no             | Jacques                     | FranceParis   |         | 2             | Bibliography |
| adele                              | La Cour de Commer rose garden    | 2             | 91.1                      | 1814                                                                                     | HGal           | no             | Descemet                    | FranceParis   |         | 4             | Bibliography |
| adele_heu                          | La Cour de Commer rose garden    | 2             | 81.7                      | 1816                                                                                     | HGal           | no             | Vibert                      | FranceParis   |         | 4             | Bibliography |
| adele_pavie                        | La Cour de Commer rose garden    | 4             | 63.5                      | 1857                                                                                     | M              | no             | Vibert                      | FranceAngers  |         | 4             | Bibliography |
| adrienne_de_cardoville             | La Cour de Commer rose garden    | 2             | 54.1                      | 1865                                                                                     | B              | no             | Guillot                     | FranceLyon    |         | 4             | Bibliography |
| aennchen_von_tharau                | Loubert rose garden              | 5             | 83.5                      | 1886                                                                                     | HMult          | no             | Geschwind                   | EuropeW       |         | 4             | Measured     |
| agar                               | La Cour de Commer rose garden    | 2             | 69.6                      | 1843                                                                                     | HGal           | no             | Vibert                      | FranceAngers  |         | 4             | Bibliography |
| agatha                             | Val de Marne rose garden         | 2             | 77.4                      | 1817                                                                                     | HGal           | no             | Unknown                     | Unknown       | Unknown | 3             | Bibliography |
| agathe_fatime                      | La Cour de Commer rose garden    | 3             | 77.1                      | 1815                                                                                     | HGal           | no             | Descemet                    | FranceParis   |         | 4             | Bibliography |
| agathe_incarnata                   | La Beaujoire rose garden         | 16            | 100.0                     | 1811                                                                                     | HGal           | no             | Miellez                     | FranceNW      | Unknown | Unknown       | Unknown      |
| agliaia                            | Val de Marne rose garden         | 11            | 52.8                      | 1895                                                                                     | HMult          | no             | Schmitt                     | FranceNE      |         | 2             | Bibliography |
| agnes                              | Val de Marne rose garden         | 13            | 100.0                     | 1900                                                                                     | HRg            | no             | Saunders                    | America       |         | 2             | Bibliography |
| aimable_ame                        | Val de Marne rose garden         | 2             | 86.2                      | 1805                                                                                     | HGal           | no             | Unknown                     | EuropeW       |         | 4             | Bibliography |
| aimable_rouge                      | La Cour de Commer rose garden    | 15            | 100.0                     | 1811                                                                                     | HGal           | no             | Vibert                      | FranceParis   |         | 4             | Bibliography |
| aimee_vibert                       | Loubert rose garden              | 10            | 88.2                      | 1828                                                                                     | N              | no             | Vibert                      | FranceParis   |         | 2             | Measured     |
| alberic_barbier                    | Val de Marne rose garden         | 9             | 66.4                      | 1900                                                                                     | HWich          | no             | Barbier                     | FranceOrleans |         | 2             | Bibliography |
| albert_la_biottais                 | Jumaju rose garden               | 6             | 45.9                      | 1881                                                                                     | HP             | no             | Moreau & Robert             | FranceAngers  | Unknown | Unknown       | Unknown      |
| alcime                             | Jumaju rose garden               | 2             | 82.5                      | 1845                                                                                     | HGal           | no             | Vibert                      | FranceAngers  |         | 4             | Bibliography |
| alexator_cramoisi                  | La Cour de Commer rose garden    | 2             | 85.8                      | 1811                                                                                     | HGal           | no             | Dupont                      | FranceParis   |         | 4             | Bibliography |
| alexander_hill_gray                | Grande roseraie de Lyon          | 9             | 70.3                      | 1909                                                                                     | T              | no             | Dickson                     | EuropeN       |         | 2             | Bibliography |
| alexandre_girault                  | Val de Marne rose garden         | 9             | 48.8                      | 1907                                                                                     | HWich          | no             | Barbier                     | FranceOrleans |         | 2             | Bibliography |
| alexandre_tremouillet              | Val de Marne rose garden         | 9             | 44.5                      | 1901                                                                                     | HWich          | no             | Barbier                     | FranceOrleans |         | 2             | Bibliography |
| alfred_colomb                      | Loubert rose garden              | 6             | 52.7                      | 1852                                                                                     | HP             | no             | Lacharme                    | FranceLyon    |         | 4             | Measured     |
| alice_hoffman                      | Désert rose garden               | 9             | 69.2                      | 1897                                                                                     | Ch             | no             | Hoffmann                    | EuropeW       | Unknown | Unknown       | Unknown      |
| alice_leroi                        | La Cour de Commer rose garden    | 2             | 95.7                      | 1842                                                                                     | M              | no             | Vibert                      | FranceAngers  |         | 4             | Bibliography |
| alice_vena                         | La Cour de Commer rose garden    | 4             | 47.2                      | 1800                                                                                     | HGal           | no             | Unknown                     | Unknown       | Unknown | Unknown       | Unknown      |
| alida_lovett                       | Val de Marne rose garden         | 8             | 70.9                      | 1905                                                                                     | HWich          | no             | Van Fleet                   | America       |         | 2             | Bibliography |
| aline_rozey                        | Jumaju rose garden               | 7             | 42.3                      | 1884                                                                                     | N              | no             | Schwartz                    | FranceLyon    |         | 4             | Measured     |
| alliance_franco_russe              | Grande roseraie de Lyon          | 8             | 99.1                      | 1899                                                                                     | T              | no             | Goinard                     | FranceAngers  |         | 2             | Bibliography |
| alpenfee                           | Loubert rose garden              | 5             | 44.1                      | 1890                                                                                     | HSet           | no             | Geschwind                   | EuropeW       |         | 4             | Measured     |
| alphonse_souper                    | Grande roseraie de Lyon          | 5             | 51.6                      | 1883                                                                                     | HP             | no             | Lacharme                    | FranceLyon    |         | 4             | Bibliography |
| alupka                             | Jumaju rose garden               | 6             | 40.9                      | 1830                                                                                     | N              | no             | Gartois                     | Asia          |         | 4             | Measured     |
| amateur_andre_fourcaud             | Val de Marne rose garden         | 8             | 77.8                      | 1903                                                                                     | HT             | no             | Puyravaud                   | FranceSW      |         | 4             | Bibliography |
| amazone                            | Désert rose garden               | 9             | 70.4                      | 1872                                                                                     | T              | no             | Ducher                      | FranceLyon    |         | 2             | Bibliography |
| ambroise_pare                      | Val de Marne rose garden         | 2             | 93.8                      | 1846                                                                                     | HGal           | no             | Vibert                      | FranceAngers  |         | 4             | Bibliography |
| amelia                             | Loubert rose garden              | 2             | 91.8                      | 1823                                                                                     | A              | no             | Vibert                      | FranceParis   |         | 4             | Measured     |
| amelia1                            | Loubert rose garden              | 2             | 90.0                      | 1823                                                                                     | A              | no             | Vibert                      | FranceParis   |         | 4             | Measured     |
| amelie_de_mansfield                | La Cour de Commer rose garden    | 2             | 91.7                      | 1842                                                                                     | HGal           | no             | Unknown                     | Unknown       | Unknown | 4             | Bibliography |
| america                            | Jardin botanique de la Tête d'Or | 8             | 92.3                      | 1893                                                                                     | HRg            | no             | Paul                        | EuropeN       |         | 2             | Bibliography |
| american_beauty                    | Loubert rose garden              | 6             | 48.8                      | 1875                                                                                     | HP             | no             | Lédéchaux                   | FranceParis   |         | 4             | Measured     |
| ami_charmet                        | Val de Marne rose garden         | 6             | 63.8                      | 1901                                                                                     | HP             | no             | Dubreuil                    | FranceLyon    |         | 4             | Bibliography |
| amy_robart                         | Loubert rose garden              | 14            | 99.9                      | 1894                                                                                     | HEg            | no             | Penzance                    | EuropeN       |         | 6             | Measured     |
| anacreon                           | La Cour de Commer rose garden    | 2             | 79.0                      | 1818                                                                                     | HGal           | no             | Vibert                      | FranceParis   |         | 4             | Bibliography |
| anatole_de_montesquieu             | Jumaju rose garden               | 10            | 97.4                      | 1860                                                                                     | HSem           | no             | Van Houtte                  | EuropeW       |         | 2             | Bibliography |
| anderken_an_moritz_von_frohlich    | Val de Marne rose garden         | 8             | 90.2                      | 1904                                                                                     | HT             | no             | Hinner                      | EuropeW       |         | 4             | Bibliography |
| andre_leroy_d_angers               | Loubert rose garden              | 6             | 68.1                      | 1866                                                                                     | HP             | no             | Trouillard                  | FranceAngers  |         | 4             | Bibliography |
| angelique_quetier                  | La Cour de Commer rose garden    | 2             | 74.2                      | 1839                                                                                     | M              | no             | Quetier                     | FranceParis   |         | 4             | Bibliography |
| anna_benary                        | Val de Marne rose garden         | 10            | 83.6                      | 1902                                                                                     | Unknown        | no             | Unknown                     | Unknown       | Unknown | Unknown       | Unknown      |
| anna_maria_de_montravel            | Loubert rose garden              | 10            | 58.5                      | 1879                                                                                     | Pol            | no             | Rambaux                     | FranceLyon    |         | 2             | Measured     |
| anna_olivier                       | Jardin botanique de la Tête d'Or | 8             | 62.6                      | 1872                                                                                     | T              | no             | Ducher                      | FranceLyon    |         | 2             | Bibliography |
| anna_scharsach                     | Loubert rose garden              | 6             | 46.1                      | 1890                                                                                     | HP             | no             | Geschwind                   | EuropeW       |         | 4             | Measured     |
| anthony_waterer                    | Loubert rose garden              | 10            | 99.2                      | 1896                                                                                     | HRg            | no             | Waterer                     | EuropeN       |         | 3             | Measured     |
| antoine_ducher                     | Grande roseraie de Lyon          | 6             | 66.2                      | 1866                                                                                     | HP             | no             | Ducher                      | FranceLyon    |         | 4             | Bibliography |
| antoine_schurz                     | Loubert rose garden              | 5             | 59.9                      | 1890                                                                                     | HP             | no             | Geschwind                   | EuropeW       |         | 4             | Measured     |
| antonia_d_ormois                   | Loubert rose garden              | 2             | 53.9                      | 1835                                                                                     | HGal           | no             | Vibert                      | FranceParis   |         | 4             | Measured     |
| antonia_d_ormois1                  | Loubert rose garden              | 2             | 71.9                      | 1835                                                                                     | HGal           | no             | Vibert                      | FranceParis   |         | 4             | Measured     |
| archiduc_charles                   | Loubert rose garden              | 9             | 72.5                      | 1815                                                                                     | HGal           | no             | Descemet                    | FranceParis   |         | 3             | Measured     |
| archiduchesse_elizabeth            | Jumaju rose garden               | 5             | 64.4                      | 1881                                                                                     | HP             | no             | Moreau & Robert             | FranceAngers  |         | 4             | Bibliography |
| archiduchesse_elizabeth_d_autriche | Loubert rose garden              | 5             | 60.3                      | 1881                                                                                     | HP             | no             | Moreau & Robert             | FranceAngers  |         | 4             | Bibliography |
| ards_rover                         | Loubert rose garden              | 9             | 37.1                      | 1898                                                                                     | HP             | no             | Dickson                     | EuropeN       |         | 3             | Measured     |
| ards_rover1                        | Loubert rose garden              | 9             | 46.3                      | 1898                                                                                     | HP             | no             | Dickson                     | EuropeN       |         | 3             | Measured     |
| aristide_(repartee)                | Loubert rose garden              | 12            | 55.1                      | 1867                                                                                     | HP             | no             | Trouillard                  | FranceAngers  |         | 3             | Measured     |
| aristobule                         | La Cour de Commer rose garden    | 2             | 90.1                      | 1849                                                                                     | M              | no             | Foullard                    | FranceAngers  |         | 4             | Bibliography |
| arlequin                           | La Cour de Commer rose garden    | 2             | 82.2                      | 1841                                                                                     | HGal           | no             | Unknown                     | Unknown       | Unknown | 4             | Bibliography |
| arthur_young                       | La Cour de Commer rose garden    | 2             | 89.5                      | 1863                                                                                     | M              | no             | Portemer                    | FranceParis   |         | 4             | Bibliography |
| asepala                            | La Cour de Commer rose garden    | 2             | 89.4                      | 1837                                                                                     | M              | no             | Foullard                    | FranceAngers  |         | 4             | Bibliography |
| astronomia                         | Val de Marne rose garden         | 9             | 52.2                      | 2006                                                                                     | S              | no             | Meilland                    | FranceSE      |         | 3             | Bibliography |
| attraction                         | Val de Marne rose garden         | 6             | 50.5                      | 1886                                                                                     | HT             | no             | Dubreuil                    | FranceLyon    |         | 4             | Bibliography |
| aurelia_liffa                      | Loubert rose garden              | 4             | 69.7                      | 1885                                                                                     | Hset           | no             | Geschwind                   | EuropeW       |         | 4             | Measured     |
| aviateur_bleriot                   | Val de Marne rose garden         | 9             | 57.9                      | 1909                                                                                     | HWich          | no             | Fauque                      | FranceOrleans |         | 2             | Bibliography |
| avoca                              | Val de Marne rose garden         | 8             | 87.6                      | 1907                                                                                     | HT             | no             | Dickson                     | EuropeN       |         | 4             | Bibliography |
| ayrshire_queen                     | Loubert rose garden              | 10            | 52.4                      | 1835                                                                                     | Ayr            | no             | Unknown                     | EuropeN       |         | 2             | Measured     |
| bachhante                          | Loubert rose garden              | 2             | 93.9                      | 1811                                                                                     | HGal           | no             | Unknown                     | Unknown       | Unknown | 4             | Measured     |
| banksiaeflora                      | Val de Marne rose garden         | 10            | 89.7                      | 1837                                                                                     | HSem           | no             | Laffay                      | FranceParis   |         | 2             | Bibliography |
| bardou_job                         | Loubert rose garden              | 8             | 54.9                      | 1887                                                                                     | B              | no             | Nabonnand                   | FranceSE      |         | 3             | Measured     |
| barillet                           | La Cour de Commer rose garden    | 2             | 91.7                      | 1850                                                                                     | M              | no             | Verdier                     | FranceParis   |         | 4             | Bibliography |
| baron_de_bonstetten                | Loubert rose garden              | 15            | 100.0                     | 1872                                                                                     | HP             | no             | Liabaud                     | FranceLyon    |         | 4             | Measured     |
| baron_de_gossard                   | La Cour de Commer rose garden    | 2             | 67.8                      | 1902                                                                                     | HP             | no             | Unknown                     | Unknown       | Unknown | 4             | Bibliography |
| baron_de_wassenaer                 | La Cour de Commer rose garden    | 2             | 91.7                      | 1854                                                                                     | M              | no             | Verdier                     | FranceParis   |         | 4             | Bibliography |
| baron_girod_de_ain                 | Loubert rose garden              | 15            | 100.0                     | 1897                                                                                     | HP             | no             | Reverchon                   | France        |         | 4             | Bibliography |
| baronne_adolphe_de_rothschild      | Grande roseraie de Lyon          | 8             | 36.3                      | 1868                                                                                     | HP             | no             | Pernet                      | FranceLyon    |         | 4             | Bibliography |
| baronne_henriette_de_snoy          | Loubert rose garden              | 9             | 79.1                      | 1897                                                                                     | T              | no             | Bernaix                     | FranceLyon    |         | 2             | Bibliography |
| baronne_prevost                    | Loubert rose garden              | 5             | 84.2                      | 1842                                                                                     | HP             | no             | Desprez                     | FranceParis   |         | 4             | Bibliography |
| beau_narcisse                      | Loubert rose garden              | 4             | 70.3                      | 1828                                                                                     | HGal           | no             | Miellez                     | FranceNW      |         | 4             | Bibliography |
| beaute_virginale                   | Jumaju rose garden               | 16            | 100.0                     | 1815                                                                                     | D              | no             | Descemet                    | FranceParis   | Unknown | Unknown       | Unknown      |
| bellard                            | Val de Marne rose garden         | 2             | 84.8                      | 1842                                                                                     | HGal           | no             | Unknown                     | Unknown       | Unknown | 4             | Bibliography |
| belle_de_baltimore                 | Loubert rose garden              | 10            | 66.2                      | 1843                                                                                     | Hset           | no             | Feast                       | America       |         | 2             | Measured     |
| belle_de_crecy                     | Loubert rose garden              | 2             | 90.6                      | 1828                                                                                     | HGal           | no             | Roeser/Hardy                | FranceParis   |         | 4             | Measured     |
| belle_de_yebles                    | Val de Marne rose garden         | 2             | 92.2                      | 1835                                                                                     | HGal           | no             | Desprez                     | FranceParis   |         | 4             | Bibliography |
| belle_des_jardins                  | Val de Marne rose garden         | 2             | 94.9                      | 1872                                                                                     | HGal           | no             | Guillot                     | FranceLyon    |         | 4             | Bibliography |
| belle_helene                       | Loubert rose garden              | 2             | 95.3                      | 1815                                                                                     | HGal           | no             | Descemet                    | FranceParis   |         | 4             | Measured     |
| belle_herminie                     | Loubert rose garden              | 2             | 94.2                      | 1819                                                                                     | HGal           | no             | Coquerel                    | FranceNW      |         | 4             | Measured     |
| belle_isis                         | Loubert rose garden              | 2             | 87.9                      | 1845                                                                                     | HGal           | no             | Parmentier                  | EuropeW       |         | 4             | Measured     |
| belle_lyonnaise                    | Désert rose garden               | 9             | 68.0                      | 1870                                                                                     | T              | no             | Levet                       | FranceLyon    |         | 2             | Bibliography |
| belle_poitevine                    | Jardin botanique de la Tête d'Or | 8             | 79.2                      | 1894                                                                                     | HRg            | no             | Bruant                      | FranceAngers  |         | 2             | Bibliography |
| belle_rosine                       | Loubert rose garden              | 3             | 64.8                      | 1829                                                                                     | HGal           | no             | Vibert                      | FranceParis   |         | 4             | Bibliography |
| belle_vichyssoise                  | Loubert rose garden              | 9             | 51.3                      | 1895                                                                                     | N              | no             | Moreau & Robert             | FranceAngers  |         | 3             | Measured     |
| belle_villageoise                  | Val de Marne rose garden         | 3             | 60.0                      | 1839                                                                                     | HGal           | no             | Vibert                      | FranceParis   |         | 4             | Bibliography |
| belle_virginie                     | Loubert rose garden              | 2             | 86.9                      | 1828                                                                                     | HGal           | no             | Jardin fleuriste de Sèvres  | FranceParis   |         | 4             | Measured     |
| belvedere                          | Loubert rose garden              | 10            | 88.5                      | 1829                                                                                     | HSem           | no             | Jacques                     | FranceParis   |         | 2             | Measured     |
| bengale_cerise                     | Désert rose garden               | 9             | 38.4                      | 1800                                                                                     | Ch             | no             | Unknown                     | China         | Unknown | Unknown       | Unknown      |
| bengale_ducher                     | Grande roseraie de Lyon          | 9             | 74.9                      | 1869                                                                                     | Ch             | no             | Ducher                      | FranceLyon    | Unknown | Unknown       | Unknown      |
| bennet_seedling                    | Loubert rose garden              | 10            | 79.2                      | 1840                                                                                     | Ayr            | no             | Bennett                     | EuropeN       |         | 2             | Measured     |

|                          |                                  |    |       |         |          |    |                                   |               |         |              |
|--------------------------|----------------------------------|----|-------|---------|----------|----|-----------------------------------|---------------|---------|--------------|
| berengere                | Loubert rose garden              | 2  | 61.6  | 1849    | M        | no | Vibert                            | FranceAngers  | 4       | Measured     |
| berenice                 | La Cour de Commer rose garden    | 2  | 95.2  | 1818    | HGal     | no | Vibert                            | FranceParis   | 4       | Bibliography |
| bicolore_incomparable    | Loubert rose garden              | 3  | 51.5  | 1866    | HP       | no | Touvais                           | FranceParis   | 4       | Bibliography |
| bijou_des_amateurs       | Val de Marne rose garden         | 1  | 50.9  | 1837    | HGal     | no | Jacquemet-Bonnefont               | FranceLyon    | 4       | Bibliography |
| billard_et_barre         | Jumaju rose garden               | 8  | 54.8  | 1898    | T        | no | Pernet-Ducher                     | FranceLyon    | 2       | Bibliography |
| bizarre_triomphant       | Val de Marne rose garden         | 2  | 63.0  | 1790    | HGal     | no | Unknown                           | EuropeW       | 4       | Bibliography |
| black_baccara            | INRA Angers                      | 8  | 87.7  | 2000    | HT       | no | Meilland                          | FranceSE      | 4       | Measured     |
| blairil_n_2              | La Beaujoire rose garden         | 4  | 58.4  | 1845    | HCh      | no | Blair                             | EuropeN       | Unknown | Unknown      |
| blanc_de_vibert          | Loubert rose garden              | 3  | 68.5  | 1846    | P        | no | Vibert                            | FranceAngers  | 4       | Measured     |
| blanc_pur                | Loubert rose garden              | 8  | 83.4  | 1827    | Misc_OGR | no | Mauget                            | FranceOrleans | 4       | Measured     |
| blanche_a_fleurs_pleines | Jardin botanique de la Tête d'Or | 10 | 44.6  | 1815    | HSem     | no | Descemet                          | FranceParis   | Unknown | Unknown      |
| blanche_de_belgique      | Loubert rose garden              | 16 | 100.0 | 1846    | A        | no | Unknown                           | EuropeW       | 6       | Bibliography |
| blanche_fleur            | La Cour de Commer rose garden    | 2  | 88.2  | 1835    | C        | no | Vibert                            | FranceParis   | 4       | Bibliography |
| blanche_moreau           | Loubert rose garden              | 2  | 89.6  | 1880    | M        | no | Moreau & Robert                   | FranceAngers  | 4       | Bibliography |
| blanche_simon            | La Cour de Commer rose garden    | 3  | 43.8  | 1863    | M        | no | Moreau & Robert                   | FranceAngers  | 4       | Bibliography |
| bleu_magenta             | Jardin botanique de la Tête d'Or | 11 | 55.5  | 1933    | HMult    | no | Grandes Roseraies du Val de Loire | FranceOrleans | 2       | Bibliography |
| blush                    | Val de Marne rose garden         | 2  | 93.4  | 1902    | M        | no | Hooker                            | EuropeN       | 4       | Bibliography |
| blush_damask             | Loubert rose garden              | 2  | 66.4  | 1760    | D        | no | Unknown                           | Unknown       | 4       | Measured     |
| blush_hip                | Loubert rose garden              | 5  | 42.7  | 1834    | A        | no | Unknown                           | EuropeN       | 4       | Measured     |
| blush_noisette           | Loubert rose garden              | 9  | 69.0  | 1814    | N        | no | Noisette                          | America       | 2       | Measured     |
| boccace                  | Loubert rose garden              | 4  | 65.1  | 1859    | HP       | no | Moreau & Robert                   | FranceAngers  | 4       | Measured     |
| bonanza                  | La Beaujoire rose garden         | 8  | 71.5  | 1982    | S        | no | Kordes                            | EuropeW       | Unknown | Unknown      |
| bonica                   | La Beaujoire rose garden         | 9  | 29.5  | 1982    | F        | no | Meilland                          | FranceSE      | 3       | Bibliography |
| bossuet                  | Loubert rose garden              | 9  | 52.9  | 1836    | HP       | no | Vibert                            | FranceParis   | 4       | Measured     |
| botzaris                 | Val de Marne rose garden         | 2  | 92.6  | 1856    | D        | no | Robert                            | FranceAngers  | 4       | Bibliography |
| bougainville             | Jardin botanique de la Tête d'Or | 12 | 99.6  | 1822    | N        | no | Cochet                            | FranceParis   | 2       | Measured     |
| boula_de_nanteuil        | Loubert rose garden              | 2  | 92.5  | 1834    | HGal     | no | Roeser                            | FranceParis   | 4       | Measured     |
| bouquet_charmant         | Val de Marne rose garden         | 16 | 100.0 | 1810    | HGal     | no | Unknown                           | EuropeW       | 4       | Bibliography |
| bouquet_d_or             | Val de Marne rose garden         | 9  | 50.9  | 1872    | N        | no | Ducher                            | FranceLyon    | 3       | Measured     |
| bouquet_d_or             | Val de Marne rose garden         | 9  | 52.9  | 1872    | N        | no | Ducher                            | FranceLyon    | 3       | Measured     |
| bouquet_de_venus         | Val de Marne rose garden         | 2  | 73.6  | 1814    | HGal     | no | Unknown                           | Unknown       | 4       | Bibliography |
| bridesmaid               | Désert rose garden               | 8  | 73.1  | 1893    | T        | no | Moore                             | America       | 2       | Bibliography |
| brocellande              | Grande roseraie de Lyon          | 8  | 74.9  | 2001    | HT       | no | Adam                              | FranceNW      | 4       | Bibliography |
| burgundy_rose            | Jumaju rose garden               | 15 | 100.0 | 1664    | HGal     | no | Unknown                           | France        | 4       | Bibliography |
| cabbage_rose             | Jumaju rose garden               | 2  | 75.8  | 1318    | C        | no | Unknown                           | EuropeW       | 4       | Bibliography |
| camaieu                  | La Cour de Commer rose garden    | 2  | 93.2  | 1826    | HGal     | no | Gendron                           | FranceAngers  | 4       | Bibliography |
| camella_rose             | Jumaju rose garden               | 9  | 61.4  | 1830    | Ch       | no | Prévost                           | FranceNW      | Unknown | Unknown      |
| capitaine_basroger       | Loubert rose garden              | 5  | 51.7  | 1890    | M        | no | Moreau & Robert                   | FranceAngers  | 4       | Measured     |
| capitaine_sisolet        | Jumaju rose garden               | 4  | 56.3  | 1843    | B        | no | Unknown                           | Unknown       | Unknown | Unknown      |
| capitaine_williams       | Val de Marne rose garden         | 2  | 82.2  | 1843    | HGal     | no | Unknown                           | Unknown       | 4       | Bibliography |
| caprice_de_meilland      | Val de Marne rose garden         | 8  | 63.1  | 1999    | HT       | no | Meilland                          | FranceSE      | 4       | Bibliography |
| captain_hayward          | Jumaju rose garden               | 6  | 62.7  | 1893    | HP       | no | Bennett                           | EuropeN       | 4       | Bibliography |
| captain_philip_green     | Désert rose garden               | 8  | 46.4  | 1899    | T        | no | Nabonnand                         | FranceSE      | 2       | Bibliography |
| capucine_bicolore        | Grande roseraie de Lyon          | 13 | 100.0 | 1590    | Sp       | no | Unknown                           | Middle East   | 4       | Bibliography |
| cardinal_de_richelieu    | Loubert rose garden              | 4  | 56.5  | 1840    | HGal     | no | Parmentier                        | EuropeW       | 3       | Bibliography |
| carmen                   | Val de Marne rose garden         | 10 | 95.6  | 1888    | HRg      | no | Lambert                           | EuropeW       | 4       | Bibliography |
| caroline_bank            | Loubert rose garden              | 6  | 64.7  | 1889    | HMult    | no | Geschwind                         | EuropeW       | 4       | Measured     |
| caroline_de_sansal       | Jumaju rose garden               | 4  | 64.1  | 1849    | HP       | no | Desprez                           | FranceParis   | 4       | Bibliography |
| caroline_marniesse       | Jumaju rose garden               | 9  | 71.2  | 1848    | N        | no | Roeser                            | FranceParis   | 3       | Measured     |
| catherine_de_wurtemberg  | La Cour de Commer rose garden    | 2  | 88.6  | 1843    | M        | no | Robert                            | FranceAngers  | 4       | Bibliography |
| catherine_ghislaine      | Val de Marne rose garden         | 2  | 90.5  | 1880    | D        | no | Unknown                           | Unknown       | Unknown | Unknown      |
| catherine_mermet         | Loubert rose garden              | 8  | 84.5  | 1870    | T        | no | Guillot                           | FranceLyon    | 2       | Bibliography |
| catherine_seyton         | Loubert rose garden              | 14 | 94.1  | 1895    | HEg      | no | Penzance                          | EuropeN       | 6       | Measured     |
| catherine_soupert        | Grande roseraie de Lyon          | 5  | 86.9  | 1879    | HP       | no | Lacharme                          | FranceLyon    | 4       | Bibliography |
| celestial                | La Cour de Commer rose garden    | 2  | 91.2  | 1739    | A        | no | Unknown                           | EuropeW       | 6       | Bibliography |
| celia                    | Grande roseraie de Lyon          | 8  | 76.3  | 1906    | HT       | no | Paul                              | EuropeN       | 4       | Bibliography |
| celina_dubos             | Val de Marne rose garden         | 2  | 89.0  | 1850    | D        | no | Dubos                             | France        | 4       | Bibliography |
| celine                   | Loubert rose garden              | 6  | 59.1  | 1824    | B        | no | Laffay                            | FranceParis   | 4       | Bibliography |
| celine_forestier         | La Beaujoire rose garden         | 9  | 77.2  | 1842    | N        | no | Trouillard                        | FranceAngers  | 2       | Measured     |
| celiana                  | Jardin botanique de la Tête d'Or | 2  | 63.2  | 1732    | D        | no | Unknown                           | EuropeW       | 4       | Bibliography |
| cent_feuilles_descemet   | Jumaju rose garden               | 1  | 66.5  | 1814    | C        | no | Descemet                          | FranceParis   | 4       | Bibliography |
| cesonie                  | La Cour de Commer rose garden    | 4  | 70.5  | 1848    | M        | no | Moreau & Robert                   | FranceAngers  | 4       | Bibliography |
| champion_of_the_world    | Loubert rose garden              | 15 | 100.0 | 1891    | HP       | no | Woodhouse                         | America       | Unknown | Unknown      |
| champneys_pink_cluster   | Loubert rose garden              | 4  | 71.6  | 1811    | N        | no | Champneys                         | America       | 2       | Measured     |
| chapelain_d_arenberg     | Val de Marne rose garden         | 5  | 65.7  | 1847    | HGal     | no | Parmentier                        | EuropeW       | 4       | Bibliography |
| charles_de_legrady       | Grande roseraie de Lyon          | 9  | 49.0  | 1884    | T        | no | Pernet-Ducher                     | FranceLyon    | 2       | Bibliography |
| charles_lawson           | Loubert rose garden              | 5  | 80.3  | 1853    | B        | no | Lawson                            | EuropeN       | 4       | Measured     |
| charles_metroz           | Val de Marne rose garden         | 9  | 37.7  | 1900    | Pol      | no | Schwartz                          | FranceLyon    | 2       | Bibliography |
| charles Quint            | Loubert rose garden              | 2  | 86.3  | 1856    | HGal     | no | Moreau & Robert                   | FranceAngers  | 4       | Measured     |
| charleston_graveyard     | Désert rose garden               | 10 | 28.2  | Unknown | HCh      | no | Unknown                           | America       | Unknown | Unknown      |
| chloris                  | Loubert rose garden              | 2  | 67.4  | 1814    | A        | no | Descemet                          | FranceParis   | 4       | Measured     |
| christine_wright         | Val de Marne rose garden         | 8  | 95.3  | 1909    | HWich    | no | Hoopes                            | America       | 4       | Bibliography |
| cibles                   | Loubert rose garden              | 12 | 87.8  | 1893    | HRg      | no | Kaufmann                          | EuropeW       | 2       | Measured     |
| cinderella               | Val de Marne rose garden         | 6  | 63.7  | 1859    | N        | no | Page                              | America       | 4       | Measured     |
| clair_jacquier           | La Cour de Commer rose garden    | 2  | 55.8  | 1887    | N        | no | Bernaix                           | FranceLyon    | 2       | Measured     |
| claudia_augusta          | Loubert rose garden              | 10 | 43.4  | 1856    | N        | no | Damaizin                          | FranceLyon    | 4       | Measured     |
| clemence_marxich         | Grande roseraie de Lyon          | 9  | 68.1  | 1900    | T        | no | Bernaix                           | FranceLyon    | 2       | Bibliography |
| clemence_raoux           | Jumaju rose garden               | 6  | 61.2  | 1869    | HP       | no | Moreau & Robert                   | FranceAngers  | 4       | Bibliography |
| clemence_robert          | La Cour de Commer rose garden    | 2  | 88.3  | 1863    | M        | no | Moreau & Robert                   | FranceAngers  | 4       | Bibliography |
| clementine               | Loubert rose garden              | 3  | 51.5  | 1818    | HGal     | no | Vibert                            | FranceParis   | 4       | Measured     |
| clio                     | Loubert rose garden              | 6  | 66.9  | 1892    | HP       | no | Paul                              | EuropeN       | 4       | Measured     |
| clotilde_soupert         | Loubert rose garden              | 10 | 69.1  | 1889    | Pol      | no | Souper & Notting                  | EuropeW       | 2       | Measured     |
| cocktail                 | Val de Marne rose garden         | 9  | 43.6  | 1957    | S        | no | Meilland                          | FranceSE      | 3       | Bibliography |
| colibri                  | Val de Marne rose garden         | 10 | 46.9  | 1885    | Pol      | no | Lille                             | FranceLyon    | 2       | Bibliography |
| columella                | Jumaju rose garden               | 2  | 83.3  | 1860    | HGal     | no | Moreau & Robert                   | FranceAngers  | 4       | Bibliography |
| commandant_beauprepaire  | Loubert rose garden              | 5  | 68.4  | 1864    | HP       | no | Moreau & Robert                   | FranceAngers  | 4       | Measured     |
| common_moss              | Jumaju rose garden               | 1  | 56.2  | 1700    | M        | no | Unknown                           | Unknown       | 4       | Bibliography |
| comte_d_epremesnil       | Jumaju rose garden               | 12 | 100.0 | 1881    | HRg      | no | Lecomte                           | FranceNW      | Unknown | Unknown      |
| comte_de_chambord        | Val de Marne rose garden         | 4  | 74.0  | 1855    | P        | no | Moreau & Robert                   | FranceAngers  | 4       | Bibliography |
| comtesse_d_oxford        | Jumaju rose garden               | 6  | 63.4  | 1869    | HP       | no | Guillot                           | FranceLyon    | 4       | Bibliography |
| comtesse_de_caserta      | Loubert rose garden              | 9  | 50.0  | 1877    | T        | no | Nabonnand                         | FranceSE      | 2       | Measured     |
| comtesse_de_galard_bearn | Désert rose garden               | 9  | 78.8  | 1893    | N        | no | Bernaix                           | FranceLyon    | 2       | Bibliography |
| comtesse_de_labarthe     | Désert rose garden               | 9  | 51.2  | 1857    | T        | no | Bernède                           | FranceSW      | 2       | Bibliography |
| comtesse_de_labarthe_cl  | Désert rose garden               | 9  | 51.7  | 1900    | T        | no | Lewis                             | Oceania       | 2       | Bibliography |
| comtesse_de_lacepede     | Jumaju rose garden               | 2  | 88.3  | 1838    | HGal     | no | Adam                              | FranceNW      | Unknown | Unknown      |
| comtesse_de_lease        | SCRADH                           | 8  | 43.6  | 1878    | T        | no | Nabonnand                         | FranceSE      | 2       | Bibliography |
| comtesse_de_murinalis    | Loubert rose garden              | 2  | 78.1  | 1843    | M        | no | Vibert                            | FranceAngers  | 4       | Measured     |
| conrad_ferdinand_meyer   | Loubert rose garden              | 9  | 44.5  | 1897    | HRg      | no | Müller                            | EuropeW       | 4       | Measured     |
| coquette_des_bianches    | Jardin botanique de la Tête d'Or | 4  | 65.8  | 1871    | B        | no | Lacharme                          | FranceLyon    | 4       | Measured     |
| coralie                  | La Cour de Commer rose garden    | 2  | 82.4  | 1828    | M        | no | Mielliez                          | FranceNW      | 4       | Bibliography |
| corallina                | Grande roseraie de Lyon          | 9  | 48.8  | 1890    | T        | no | Paul                              | EuropeN       | 2       | Bibliography |
| cornelle                 | Jardin botanique de la Tête d'Or | 9  | 52.1  | 1858    | N        | no | Moreau & Robert                   | FranceAngers  | 2       | Bibliography |
| coronation               | Val de Marne rose garden         | 9  | 48.7  | 1911    | HWich    | no | Turner                            | EuropeN       | 2       | Bibliography |
| coronet                  | Val de Marne rose garden         | 10 | 61.3  | 1912    | Pol      | no | Paul                              | EuropeN       | 2       | Bibliography |
| corporal_johann_nagy     | Loubert rose garden              | 4  | 72.5  | 1890    | Hset     | no | Geschwind                         | EuropeW       | 4       | Measured     |
| cosimo_ridolphi          | La Cour de Commer rose garden    | 3  | 59.6  | 1842    | HGal     | no | Vibert                            | FranceAngers  | 4       | Bibliography |
| coupe_d_hebe             | Jardin botanique de la Tête d'Or | 8  | 62.0  | 1833    | B        | no | Bizard                            | FranceAngers  | 4       | Bibliography |
| cramoisi_eblouissant     | Loubert rose garden              | 2  | 92.6  | 1829    | Ch       | no | Unknown                           | EuropeW       | 4       | Measured     |
| cramoisi_picote          | Val de Marne rose garden         | 2  | 77.2  | 1837    | HGal     | no | Vibert                            | FranceParis   | 4       | Bibliography |
| cramoisi_superieur       | Loubert rose garden              | 9  | 62.1  | 1832    | Ch       | no | Coquerel                          | FranceNW      | 3       | Measured     |
| creme                    | Loubert rose garden              | 10 | 94.6  | 1894    | S        | no | Geschwind                         | EuropeW       | 2       | Measured     |
| crepuscule               | Val de Marne rose garden         | 9  | 68.5  | 1904    | N        | no | Dubreuil                          | FranceLyon    | 2       | Measured     |
| crimson_globe            | Loubert rose garden              | 4  | 52.9  | 1839    | M        | no | Paul                              | EuropeN       | 4       | Measured     |
| crimson_rambler          | Jardin botanique de la Tête d'Or | 10 | 91.4  | 1893    | HMult    | no | Unknown                           | Asia          | 2       | Bibliography |
| cuisse_de_nymphe         | La Cour de Commer rose garden    | 2  | 91.7  | 1400    | A        | no | Unknown                           | Middle East   | 6       | Bibliography |
| cuisse_de_nymphe_emue    | Loubert rose garden              | 16 | 100.0 | 1800    | A        | no | Dumont de Courset                 | EuropeN       | 3       | Measured     |
| cumberland_belle         | La Cour de Commer rose garden    | 8  | 90.9  | 1900    | M        | no | Dreer                             | America       | 4       | Bibliography |
| cyclope                  | Val de Marne rose garden         | 7  | 27.5  | 1909    | Pol      | no | Dubreuil                          | FranceLyon    | 2       | Bibliography |
| daniel_lacombe           | Désert rose garden               | 7  | 34.8  | 1885    | HMult    | no | Allard                            | FranceAngers  | 2       | Bibliography |

|                                     |                                  |    |       |         |         |    |                   |               |         |              |
|-------------------------------------|----------------------------------|----|-------|---------|---------|----|-------------------|---------------|---------|--------------|
| dawson                              | Loubert rose garden              | 10 | 54.1  | 1888    | HMult   | no | Dawson            | America       | 2       | Measured     |
| dawson1                             | Loubert rose garden              | 10 | 52.0  | 1888    | HMult   | no | Dawson            | America       | 2       | Measured     |
| de_candolle                         | La Cour de Commer rose garden    | 2  | 91.7  | 1857    | M       | no | Portemer          | FranceParis   | 4       | Bibliography |
| decoration_de_geschwind             | Loubert rose garden              | 5  | 72.8  | 1884    | HMult   | no | Geschwind         | EuropeW       | 4       | Measured     |
| delille                             | Loubert rose garden              | 5  | 57.6  | 1852    | M       | no | Robert            | FranceAngers  | 4       | Measured     |
| dembrowsky                          | Val de Marne rose garden         | 3  | 70.0  | 1849    | HP      | no | Vibert            | FranceAngers  | 4       | Bibliography |
| depute_debussy                      | Val de Marne rose garden         | 8  | 39.2  | 1902    | HT      | no | Buatois           | FranceNE      | 4       | Bibliography |
| deschamps                           | Jumaju rose garden               | 9  | 72.4  | 1877    | N       | no | Deschamp          | France        | 4       | Measured     |
| desire_bergera                      | Val de Marne rose garden         | 10 | 31.9  | 1909    | HWich   | no | Barbier           | FranceOrleans | 2       | Bibliography |
| desire_parmentier                   | Val de Marne rose garden         | 3  | 60.2  | 1841    | HGal    | no | Parmentier        | EuropeW       | 4       | Bibliography |
| desprez_a_fleur_jaune               | La Beaujoire rose garden         | 9  | 63.8  | 1835    | N       | no | Desprez           | FranceParis   | 2       | Measured     |
| deuil_de_paul_fontaine              | Loubert rose garden              | 4  | 62.5  | 1873    | M       | no | Fontaine          | FranceParis   | 4       | Bibliography |
| devoniensis                         | Jumaju rose garden               | 8  | 90.3  | 1838    | T       | no | Foster            | EuropeN       | 2       | Bibliography |
| diabolo                             | Val de Marne rose garden         | 9  | 47.6  | 1909    | HWich   | no | Fauque            | FranceOrleans | 2       | Bibliography |
| directeur_alphand                   | Jumaju rose garden               | 5  | 83.4  | 1883    | HP      | no | Lévêque           | FranceParis   | 4       | Bibliography |
| directeur_constant_bernard          | Val de Marne rose garden         | 8  | 72.5  | 1886    | HT      | no | Souper & Notting  | EuropeW       | 4       | Bibliography |
| dis-moi_qui_je_suis                 | La Cour de Commer rose garden    | 4  | 71.7  | Unknown | HGal    | no | Unknown           | Unknown       | 4       | Bibliography |
| docteur_bailion                     | Grande roseraie de Lyon          | 6  | 63.2  | 1878    | HP      | no | Margottin         | FranceParis   | 4       | Bibliography |
| docteur_grill                       | Désert rose garden               | 9  | 61.1  | 1884    | T       | no | Bonnaire          | FranceLyon    | 2       | Bibliography |
| docteur_marjolin                    | La Cour de Commer rose garden    | 3  | 43.9  | 1842    | M       | no | Moreau & Robert   | FranceAngers  | 4       | Bibliography |
| docteur_o_donel_browne              | Val de Marne rose garden         | 6  | 42.5  | 1908    | HT      | no | Dickson           | EuropeN       | 4       | Bibliography |
| docteur_ricaud                      | Val de Marne rose garden         | 10 | 43.7  | 1906    | Pol     | no | Corboeuf          | FranceOrleans | 2       | Bibliography |
| docteur_troendlin                   | Val de Marne rose garden         | 8  | 94.8  | 1904    | HT      | no | Kaiser            | EuropeW       | 4       | Bibliography |
| dometil_beccard                     | Val de Marne rose garden         | 2  | 64.3  | 1839    | C       | no | Vibert            | FranceParis   | 4       | Bibliography |
| dona_sol                            | Loubert rose garden              | 2  | 88.0  | 1842    | HGal    | no | Vibert            | FranceAngers  | 4       | Measured     |
| donau                               | Val de Marne rose garden         | 10 | 39.2  | 1913    | HWich   | no | Prskac            | EuropeW       | 2       | Bibliography |
| dorothy_perkins                     | Val de Marne rose garden         | 10 | 83.8  | 1901    | HWich   | no | Jackson & Perkins | America       | 2       | Bibliography |
| double_brique                       | Val de Marne rose garden         | 2  | 92.1  | 1842    | HGal    | no | Unknown           | Unknown       | 4       | Bibliography |
| double_delight                      | La Beaujoire rose garden         | 6  | 63.1  | 1977    | HT      | no | Swim              | America       | 4       | Bibliography |
| double_pink                         | Val de Marne rose garden         | 13 | 98.7  | 1819    | HSpn    | no | Unknown           | EuropeN       | 4       | Bibliography |
| double_white                        | Val de Marne rose garden         | 13 | 100.0 | 1808    | HSpn    | no | Unknown           | EuropeN       | 4       | Bibliography |
| duc_d_angouleme                     | La Cour de Commer rose garden    | 15 | 100.0 | 1821    | C       | no | Unknown           | EuropeW       | 3       | Bibliography |
| duc_d_angouleme                     | Loubert rose garden              | 4  | 60.1  | 1821    | C       | no | Unknown           | EuropeW       | 3       | Measured     |
| duc_d_anjou                         | Loubert rose garden              | 2  | 89.1  | 1862    | HP      | no | Boyau             | FranceAngers  | 4       | Bibliography |
| duc_de_bordeaux                     | Val de Marne rose garden         | 2  | 88.8  | 1820    | HGal    | no | Vibert            | FranceParis   | 4       | Bibliography |
| duc_de_brabant                      | La Cour de Commer rose garden    | 2  | 93.5  | 1817    | C       | no | Verleeuwen        | EuropeW       | 4       | Bibliography |
| duc_de_cambridge                    | Loubert rose garden              | 4  | 55.8  | 1840    | D       | no | Laffay            | FranceParis   | 4       | Measured     |
| duc_de_constantine                  | Jardin botanique de la Tête d'Or | 10 | 72.4  | 1857    | Ayr     | no | Schmitt           | FranceLyon    | Unknown | Unknown      |
| duc_de_crillon                      | Val de Marne rose garden         | 6  | 42.1  | 1860    | B       | no | Moreau & Robert   | FranceAngers  | 4       | Bibliography |
| duc_de_marlborough                  | Jumaju rose garden               | 15 | 97.2  | 1885    | HP      | no | Vibert            | FranceAngers  | 4       | Bibliography |
| duchess_of_sutherland               | Val de Marne rose garden         | 8  | 91.5  | 1839    | HT      | no | Dickson           | EuropeN       | 4       | Bibliography |
| duchesse_d_abrantes                 | La Cour de Commer rose garden    | 2  | 88.8  | 1851    | M       | no | Robert            | FranceAngers  | 4       | Bibliography |
| duchesse_d_angouleme                | La Cour de Commer rose garden    | 5  | 58.0  | 1826    | HGal    | no | Vibert            | FranceParis   | 4       | Bibliography |
| duchesse_d_istrie                   | La Cour de Commer rose garden    | 4  | 46.7  | 1855    | M       | no | Laffay            | FranceParis   | 4       | Bibliography |
| duchesse_de_berry                   | Loubert rose garden              | 2  | 81.8  | 1825    | HGal    | no | Vibert            | FranceParis   | 4       | Measured     |
| duchesse_de_brabant                 | Loubert rose garden              | 9  | 51.5  | 1857    | T       | no | Bernède           | FranceSW      | 2       | Bibliography |
| duchesse_de_bucclough               | Val de Marne rose garden         | 5  | 57.0  | 1837    | HGal    | no | Vibert            | FranceParis   | 4       | Bibliography |
| duchesse_de_cambaceres              | Jumaju rose garden               | 6  | 64.8  | 1854    | HP      | no | Fontaine          | FranceParis   | 4       | Bibliography |
| duchesse_de_grammont                | Loubert rose garden              | 10 | 33.8  | 1838    | N       | no | Unknown           | Unknown       | 2       | Bibliography |
| duchesse_de_montebello              | Loubert rose garden              | 2  | 77.4  | 1824    | HGal    | no | Laffay            | FranceParis   | 4       | Measured     |
| duchesse_de_portland                | Loubert rose garden              | 2  | 89.8  | 1799    | P       | no | Unknown           | Unknown       | 4       | Measured     |
| duchesse_de_verneuil                | Loubert rose garden              | 2  | 94.5  | 1856    | M       | no | Portemer          | FranceParis   | 4       | Measured     |
| duke_of_connaught                   | Val de Marne rose garden         | 8  | 44.2  | 1879    | HT      | no | Bennett           | EuropeN       | 4       | Bibliography |
| duke_of_edinburgh                   | Jumaju rose garden               | 6  | 56.9  | 1868    | HP      | no | Paul              | EuropeN       | Unknown | Unknown      |
| duke_of_york                        | Jumaju rose garden               | 9  | 76.8  | 1893    | Ch      | no | Paul              | EuropeN       | Unknown | Unknown      |
| dumortier                           | Val de Marne rose garden         | 5  | 54.9  | 1843    | HGal    | no | Parmentier        | EuropeW       | 4       | Bibliography |
| dupuy_jamain                        | Loubert rose garden              | 6  | 65.2  | 1868    | HP      | no | Jamain            | FranceParis   | 4       | Bibliography |
| dutch_fork_china                    | Désert rose garden               | 9  | 49.7  | Unknown | Ch      | no | Unknown           | America       | Unknown | Unknown      |
| e_veyrat_hermanos                   | Grande roseraie de Lyon          | 9  | 67.9  | 1895    | T       | no | Bernaix           | FranceLyon    | 2       | Bibliography |
| earl_of_eldon                       | Jumaju rose garden               | 8  | 82.2  | 1872    | N       | no | Copin             | EuropeN       | 3       | Measured     |
| eclair                              | Jumaju rose garden               | 9  | 34.6  | 1883    | HP      | no | Lacharme          | FranceLyon    | 4       | Bibliography |
| edmee_et_roger                      | Val de Marne rose garden         | 8  | 85.2  | 1902    | HT      | no | Ketten            | EuropeW       | 4       | Bibliography |
| edmond_deshays                      | Val de Marne rose garden         | 8  | 83.6  | 1902    | HT      | no | Bernaix           | FranceLyon    | 4       | Bibliography |
| edmond_proust                       | Val de Marne rose garden         | 9  | 60.4  | 1903    | HWich   | no | Barbier           | FranceOrleans | 2       | Bibliography |
| el_arena                            | Jumaju rose garden               | 13 | 94.1  | 1912    | HSpn    | no | Geschwind         | EuropeW       | Unknown | Unknown      |
| eleonore_berkeley                   | Val de Marne rose garden         | 10 | 97.5  | 1902    | HMult   | no | Unknown           | EuropeN       | 2       | Bibliography |
| elie_beauvillain_cl                 | Val de Marne rose garden         | 9  | 48.1  | 1887    | T       | no | Beauvillain       | FranceSW      | 2       | Bibliography |
| elina                               | La Beaujoire rose garden         | 8  | 77.0  | 1984    | HT      | no | Dickson           | EuropeN       | 4       | Bibliography |
| elisa_boelle                        | Jumaju rose garden               | 2  | 87.7  | 1869    | HP      | no | Guillot           | FranceLyon    | 4       | Bibliography |
| elisa_robichon                      | Val de Marne rose garden         | 11 | 65.8  | 1902    | HWich   | no | Barbier           | FranceOrleans | 2       | Bibliography |
| elisabeth_brow                      | La Cour de Commer rose garden    | 4  | 69.9  | 1883    | M       | no | Stammler          | Unknown       | 4       | Bibliography |
| elisabeth_d_angleterre              | Jardin botanique de la Tête d'Or | 14 | 99.1  | 1817    | Unknown | no | Dupont            | FranceParis   | 5       | Bibliography |
| elise_rovella                       | Val de Marne rose garden         | 2  | 76.6  | 1842    | HGal    | no | Unknown           | Unknown       | 4       | Bibliography |
| emera                               | INRA Angers                      | 8  | 44.5  | 1988    | S       | no | Noak              | EuropeW       | 3       | Bibliography |
| emily_laxton                        | Jumaju rose garden               | 5  | 64.3  | 1876    | HP      | no | Laxton            | EuropeN       | 4       | Bibliography |
| emotion                             | Val de Marne rose garden         | 6  | 66.7  | 1862    | B       | no | Guillot           | FranceLyon    | 4       | Bibliography |
| empress_of_china                    | Val de Marne rose garden         | 9  | 73.9  | 1893    | Ch      | no | Jackson           | America       | 2       | Bibliography |
| enfant_de_france                    | Grande roseraie de Lyon          | 9  | 63.2  | 1857    | HP      | no | Lartay            | FranceParis   | 4       | Bibliography |
| erinnerung_an_brod                  | Jumaju rose garden               | 5  | 90.2  | 1886    | HSet    | no | Geschwind         | EuropeW       | Unknown | Unknown      |
| erinnerung_an_schloss_scharfenstein | Loubert rose garden              | 6  | 44.4  | 1892    | HT      | no | Geschwind         | EuropeW       | 4       | Bibliography |
| ernest_dupre                        | Jumaju rose garden               | 6  | 57.3  | 1904    | HP      | no | Boutigny          | FranceNW      | 4       | Bibliography |
| ernest_morel                        | Loubert rose garden              | 6  | 50.6  | 1898    | HP      | no | Cochet            | FranceParis   | 4       | Measured     |
| ernst_dorell                        | Loubert rose garden              | 4  | 56.1  | 1887    | HMult   | no | Geschwind         | EuropeW       | 4       | Measured     |
| esther                              | Val de Marne rose garden         | 2  | 91.1  | 1819    | HGal    | no | Vibert            | FranceParis   | 4       | Bibliography |
| etienne_levet                       | Grande roseraie de Lyon          | 6  | 64.5  | 1871    | HP      | no | Levet             | FranceLyon    | 4       | Bibliography |
| etoile_de_lyon                      | Loubert rose garden              | 9  | 60.1  | 1881    | T       | no | Guillot           | FranceLyon    | 2       | Measured     |
| etoile_de_portugal                  | Désert rose garden               | 9  | 45.7  | 1898    | HG      | no | Cayeux            | Europe5       | Unknown | Unknown      |
| eucharis                            | Val de Marne rose garden         | 2  | 94.7  | 1815    | HGal    | no | Descemet          | FranceParis   | 4       | Bibliography |
| eugene_de_beaharnais                | Désert rose garden               | 6  | 65.9  | 1838    | Ch      | no | Hardy             | FranceParis   | Unknown | Unknown      |
| eugene_furst                        | Loubert rose garden              | 6  | 52.5  | 1875    | HP      | no | Souper & Notting  | EuropeW       | 4       | Measured     |
| eugenie_chamusseau                  | Jumaju rose garden               | 3  | 56.9  | 1872    | C       | no | Verdier           | FranceParis   | 4       | Bibliography |
| eugenie_de_guinoisseau              | La Cour de Commer rose garden    | 3  | 49.8  | 1846    | M       | no | Guinoisseau-Flon  | FranceAngers  | 4       | Bibliography |
| eugenius                            | Val de Marne rose garden         | 13 | 100.0 | 1848    | HSpn    | no | Unknown           | Unknown       | 4       | Bibliography |
| eulalie_lebrun                      | Val de Marne rose garden         | 2  | 89.9  | 1844    | HGal    | no | Vibert            | FranceAngers  | 4       | Bibliography |
| euphrosine                          | Loubert rose garden              | 10 | 80.0  | 1895    | HMult   | no | Schmitt           | FranceLyon    | 2       | Measured     |
| eurydice                            | Loubert rose garden              | 16 | 89.4  | 1887    | HSet    | no | Geschwind         | EuropeW       | 3       | Bibliography |
| evergreen_gene                      | Désert rose garden               | 8  | 50.6  | 2007    | HG      | no | Viraraghavan      | Asia          | Unknown | Unknown      |
| fabvier                             | Jumaju rose garden               | 9  | 54.5  | 1829    | Ch      | no | Laffay            | FranceParis   | 3       | Bibliography |
| fanny_essler                        | La Cour de Commer rose garden    | 2  | 65.8  | 1835    | HGal    | no | Vibert            | FranceParis   | 4       | Bibliography |
| fanny_pavotot                       | La Cour de Commer rose garden    | 5  | 71.1  | 1820    | HGal    | no | Unknown           | Unknown       | 4       | Bibliography |
| fatinitza                           | Loubert rose garden              | 9  | 47.3  | 1886    | HMult   | no | Geschwind         | EuropeW       | 2       | Measured     |
| felicite_bohain                     | Loubert rose garden              | 2  | 81.2  | 1866    | M       | no | Unknown           | France        | 4       | Bibliography |
| felicite_parmentier                 | Loubert rose garden              | 16 | 100.0 | 1841    | A       | no | Parmentier        | EuropeW       | 4       | Measured     |
| fellelberg                          | Jumaju rose garden               | 9  | 53.6  | 1835    | Ch      | no | Fellelberg        | EuropeW       | 3       | Measured     |
| fen_zhang_lu                        | Désert rose garden               | 9  | 53.2  | Unknown | Ch      | no | Unknown           | China         | Unknown | Unknown      |
| ferdinand_chaffotte                 | Jumaju rose garden               | 16 | 100.0 | 1878    | HP      | no | Pernet            | FranceLyon    | 2       | Bibliography |
| ferdinand_de_buck                   | Val de Marne rose garden         | 2  | 51.8  | 1842    | HGal    | no | Unknown           | Unknown       | 4       | Bibliography |
| ferdinand_de_lesseps                | Private donations                | 8  | 67.2  | 1869    | HP      | no | Granger           | FranceParis   | 4       | Bibliography |
| ferdinand_rousset                   | Val de Marne rose garden         | 11 | 60.8  | 1902    | HWich   | no | Barbier           | FranceOrleans | 2       | Bibliography |
| fimbriata                           | Loubert rose garden              | 10 | 95.9  | 1891    | HRg     | no | Morlet            | FranceNE      | 3       | Measured     |
| fisher_et_holmes                    | Loubert rose garden              | 6  | 40.7  | 1865    | HP      | no | Verdier           | FranceParis   | 4       | Bibliography |
| fleur_bicolore                      | Private donations                | 12 | 79.2  | 1810    | Unknown | no | Unknown           | EuropeW       | 2       | Bibliography |
| fleur_de_pelletier                  | Val de Marne rose garden         | 3  | 65.7  | 1832    | HGal    | no | Unknown           | Unknown       | 4       | Bibliography |
| floccon_de_neige                    | Loubert rose garden              | 10 | 49.6  | 1898    | Ch      | no | Lille             | FranceLyon    | 2       | Measured     |
| flora                               | Jardin botanique de la Tête d'Or | 10 | 68.7  | 1830    | HSem    | no | Jacques           | FranceParis   | 2       | Bibliography |
| flora_mac_ivor                      | Loubert rose garden              | 14 | 99.9  | 1830    | HEg     | no | Lord_Penzance     | EuropeN       | 6       | Measured     |
| flora                               | Val de Marne rose garden         | 6  | 27.8  | 1829    | HSem    | no | Jacques           | FranceParis   | 2       | Bibliography |
| flush_o_dawn                        | Val de Marne rose garden         | 8  | 81.5  | 1900    | HT      | no | Walsh             | America       | 4       | Bibliography |
| flosiace                            | La Cour de Commer rose garden    | 2  | 88.9  | 1810    | C       | no | Unknown           | EuropeW       | 4       | Bibliography |

|                                |                                  |    |       |         |         |    |                  |               |         |              |
|--------------------------------|----------------------------------|----|-------|---------|---------|----|------------------|---------------|---------|--------------|
| fortune_s_five_color           | Désert rose garden               | 10 | 74.8  | 1844    | T       | no | Fortune          | EuropeN       | 2       | Bibliography |
| fragrant_cloud                 | La Beaujoire rose garden         | 8  | 85.9  | 1967    | HT      | no | Tantau           | EuropeW       | 4       | Bibliography |
| francois_arago                 | Loubert rose garden              | 6  | 49.0  | 1858    | HP      | no | Trouillard       | FranceAngers  | 4       | Measured     |
| francois_coppee                | Jumaju rose garden               | 9  | 55.7  | 1895    | HP      | no | Ledéchaux        | FranceParis   | 2       | Bibliography |
| francois_de_salignac           | La Cour de Commer rose garden    | 2  | 90.3  | 1854    | M       | no | Robert           | FranceAngers  | 2       | Bibliography |
| francois_guillot               | Val de Marne rose garden         | 9  | 62.1  | 1905    | HWich   | no | Barbier          | FranceOrleans | 2       | Bibliography |
| francois_juranville            | Val de Marne rose garden         | 9  | 49.3  | 1906    | HWich   | no | Barbier          | FranceOrleans | 2       | Bibliography |
| francois_levet                 | Loubert rose garden              | 5  | 87.0  | 1880    | HP      | no | Levet            | FranceLyon    | 4       | Measured     |
| frau_helene_videnz             | Val de Marne rose garden         | 10 | 88.6  | 1904    | HMult   | no | Lambert          | EuropeW       | 2       | Bibliography |
| frau_karl_druschki             | Grande roseraie de Lyon          | 9  | 67.2  | 1901    | HP      | no | Lambert          | EuropeW       | 4       | Bibliography |
| fraulein_octavia_hesse         | Val de Marne rose garden         | 9  | 52.7  | 1909    | HWich   | no | Hesse            | EuropeW       | 2       | Bibliography |
| frederic_ii_de_prusse          | Loubert rose garden              | 4  | 66.5  | 1847    | HCh     | no | Verdier          | FranceParis   | 3       | Measured     |
| friesia                        | La Beaujoire rose garden         | 9  | 55.5  | 1973    | F       | no | Kordes           | EuropeW       | 4       | Bibliography |
| fulgens_gallique               | Loubert rose garden              | 4  | 63.7  | 1828    | HGal    | no | Vibert           | FranceParis   | 4       | Measured     |
| g_nabonnand                    | Grande roseraie de Lyon          | 9  | 48.2  | 1888    | T       | no | Nabonnand        | FranceSE      | 2       | Bibliography |
| gabrielle_luizet               | Loubert rose garden              | 6  | 71.2  | 1877    | HP      | no | Liabaud          | FranceLyon    | 4       | Measured     |
| gardeniaeflora                 | Jardin botanique de la Tête d'Or | 10 | 82.1  | 1900    | HMult   | no | Benary           | EuropeW       | 2       | Bibliography |
| gaspard_monge                  | Loubert rose garden              | 4  | 54.8  | 1854    | C       | no | Robert           | FranceAngers  | 4       | Measured     |
| gazella                        | Val de Marne rose garden         | 3  | 52.3  | 1902    | HGal    | no | Unknown          | Unknown       | 4       | Bibliography |
| gant_des_batailles             | Grande roseraie de Lyon          | 6  | 53.9  | 1846    | HP      | no | Nérard           | FranceLyon    | Unknown | Unknown      |
| gelbe_dagmar_hastrup           | Loubert rose garden              | 10 | 76.1  | 1897    | HRg     | no | Moore            | America       | 2       | Bibliography |
| general_barral                 | Jumaju rose garden               | 5  | 71.6  | 1867    | HP      | no | Granger          | FranceParis   | 4       | Bibliography |
| general_clerc                  | La Cour de Commer rose garden    | 9  | 58.7  | 1845    | M       | no | Portemer         | FranceAngers  | 4       | Bibliography |
| general_drouot                 | Val de Marne rose garden         | 2  | 85.6  | 1842    | HGal    | no | Unknown          | Unknown       | 4       | Bibliography |
| general_drouot                 | La Cour de Commer rose garden    | 3  | 64.8  | 1845    | M       | no | Vibert           | FranceAngers  | 4       | Bibliography |
| general_gallieni               | SCRADH                           | 9  | 62.0  | 1899    | T       | no | Nabonnand        | FranceSE      | 2       | Bibliography |
| general_jacqueminot            | Jumaju rose garden               | 6  | 59.9  | 1853    | HP      | no | Roussel          | France        | 4       | Bibliography |
| general_kleber                 | Loubert rose garden              | 2  | 83.7  | 1856    | M       | no | Robert           | FranceAngers  | 4       | Measured     |
| general_schablikine            | SCRADH                           | 9  | 65.3  | 1878    | T       | no | Nabonnand        | FranceSE      | 2       | Bibliography |
| georges_cain                   | Jumaju rose garden               | 9  | 55.4  | 1909    | HRg     | no | Müller           | EuropeW       | 2       | Bibliography |
| georges_vibert                 | Val de Marne rose garden         | 2  | 89.7  | 1853    | HGal    | no | Robert           | FranceAngers  | 4       | Bibliography |
| gertrude                       | Val de Marne rose garden         | 8  | 79.3  | 1903    | HT      | no | Dickson          | FranceN       | 4       | Bibliography |
| geschwind_s_nordland_n°_1      | Loubert rose garden              | 5  | 82.8  | 1884    | HSet    | no | Geschwind        | EuropeW       | 4       | Measured     |
| geschwind_s_orden              | Loubert rose garden              | 4  | 76.3  | 1886    | HMult   | no | Geschwind        | EuropeW       | 4       | Measured     |
| geschwind_s_schonstee          | Loubert rose garden              | 9  | 40.2  | 1900    | HMult   | no | Geschwind        | EuropeW       | 3       | Measured     |
| gilda                          | Loubert rose garden              | 4  | 69.1  | 1887    | HMult   | no | Geschwind        | EuropeW       | 2       | Bibliography |
| gloire_d_orient                | La Cour de Commer rose garden    | 2  | 79.7  | 1855    | M       | no | Béluzé           | FranceLyon    | 4       | Bibliography |
| gloire_de_dijon                | Val de Marne rose garden         | 8  | 80.2  | 1850    | T       | no | Jacotot          | FranceNE      | Unknown | Unknown      |
| gloire_de_dijon1               | Val de Marne rose garden         | 9  | 72.4  | 1850    | T       | no | Jacotot          | FranceNE      | Unknown | Unknown      |
| gloire_de_ducher               | Val de Marne rose garden         | 5  | 44.9  | 1865    | HP      | no | Ducher           | FranceLyon    | 4       | Bibliography |
| gloire_des_mousseux            | Loubert rose garden              | 5  | 55.2  | 1852    | M       | no | Laffay           | FranceParis   | 4       | Measured     |
| gloire_des_polyanthas          | Jumaju rose garden               | 9  | 41.4  | 1887    | Pol     | no | Guillot          | FranceLyon    | Unknown | Unknown      |
| gloire_des_rosomanes           | Loubert rose garden              | 10 | 54.6  | 1825    | Ch      | no | Vibert           | FranceParis   | 4       | Measured     |
| gloire_lyonnaise               | Loubert rose garden              | 9  | 53.7  | 1884    | HP      | no | Guillot          | FranceLyon    | 3       | Measured     |
| glory_of_waltham               | Jumaju rose garden               | 6  | 43.3  | 1865    | HP      | no | Vigneron         | FranceAngers  | 4       | Bibliography |
| goethe                         | La Cour de Commer rose garden    | 15 | 100.0 | 1911    | M       | no | Lambert          | EuropeW       | 3       | Bibliography |
| gourdault                      | Val de Marne rose garden         | 8  | 52.9  | 1859    | B       | no | Guillot          | FranceLyon    | 4       | Bibliography |
| grace_molyneux                 | Val de Marne rose garden         | 8  | 72.4  | 1909    | HT      | no | Dickson          | EuropeN       | 4       | Bibliography |
| gracilis                       | La Cour de Commer rose garden    | 2  | 83.9  | 1820    | A       | no | Calvert          | FranceNW      | 6       | Bibliography |
| graham_thomas                  | Val de Marne rose garden         | 8  | 37.4  | 1983    | S       | no | Austin           | EuropeN       | 4       | Bibliography |
| grand_cramoisi                 | La Cour de Commer rose garden    | 2  | 85.0  | 1818    | HGal    | no | Vibert           | FranceParis   | 4       | Bibliography |
| grand_duc_alexis               | Jumaju rose garden               | 6  | 68.8  | 1892    | HP      | no | Lévêque          | FranceParis   | 4       | Bibliography |
| grande_cramoisi                | Val de Marne rose garden         | 16 | 100.0 | 1818    | HGal    | no | Vibert           | FranceParis   | 4       | Bibliography |
| grande_renoncule               | Val de Marne rose garden         | 3  | 62.5  | 1842    | HGal    | no | Unknown          | Unknown       | 4       | Bibliography |
| green_mantle                   | Jardin botanique de la Tête d'Or | 14 | 97.2  | 1895    | HEg     | no | Penzance         | EuropeN       | 5       | Bibliography |
| gribaldo_nicola                | Jumaju rose garden               | 6  | 62.4  | 1890    | T       | no | Souper & Notting | EuropeW       | 2       | Bibliography |
| gruss_an_tepnitz               | Loubert rose garden              | 6  | 62.1  | 1897    | HCh     | no | Geschwind        | EuropeW       | 4       | Bibliography |
| haddington                     | Loubert rose garden              | 2  | 68.4  | 1828    | HGal    | no | Unknown          | Unknown       | Unknown | Unknown      |
| hansa                          | Val de Marne rose garden         | 12 | 100.0 | 1905    | HRg     | no | Schaum/Van_Tol   | EuropeW       | 2       | Bibliography |
| hector                         | Val de Marne rose garden         | 5  | 69.5  | 1828    | HGal    | no | Parmentier       | EuropeW       | 4       | Bibliography |
| helene_granger                 | Jardin botanique de la Tête d'Or | 9  | 72.0  | 1910    | HMult   | no | Granger          | FranceParis   | Unknown | Unknown      |
| helga_s_dream                  | Flower Research Institute, China | 10 | 99.5  | Unknown | HMult   | no | Unknown          | China         | Unknown | Unknown      |
| henri_4                        | Loubert rose garden              | 6  | 44.3  | 1862    | HP      | no | Verdier          | FranceParis   | 4       | Bibliography |
| henri_fouquier                 | La Cour de Commer rose garden    | 2  | 95.3  | 1842    | HGal    | no | Unknown          | Unknown       | 4       | Bibliography |
| henri_martin                   | Val de Marne rose garden         | 2  | 67.9  | 1862    | M       | no | Laffay           | FranceParis   | 4       | Bibliography |
| henriette                      | La Cour de Commer rose garden    | 2  | 88.2  | 1811    | HGal    | no | Unknown          | America       | 4       | Bibliography |
| herodiade                      | Jardin botanique de la Tête d'Or | 9  | 66.7  | 1888    | N       | no | Brassac          | FranceSW      | 2       | Bibliography |
| hiawatha                       | Val de Marne rose garden         | 9  | 30.3  | 1904    | HMult   | no | Walsh            | America       | 2       | Bibliography |
| himmelsauge                    | Loubert rose garden              | 3  | 54.0  | 1893    | HSet    | no | Geschwind        | EuropeW       | 4       | Measured     |
| hippolyte                      | Loubert rose garden              | 4  | 62.7  | 1832    | HGal    | no | Parmentier       | EuropeW       | 3       | Measured     |
| homere                         | Désert rose garden               | 9  | 63.2  | 1858    | T       | no | Moreau & Robert  | FranceAngers  | 3       | Bibliography |
| horace_vernet                  | Loubert rose garden              | 2  | 78.3  | 1866    | HP      | no | Guillot          | FranceLyon    | 4       | Measured     |
| horace_vernet                  | Loubert rose garden              | 2  | 82.8  | 1866    | HP      | no | Guillot          | FranceLyon    | 4       | Measured     |
| hortense_vernet                | La Cour de Commer rose garden    | 2  | 86.3  | 1861    | M       | no | Moreau & Robert  | FranceAngers  | 4       | Bibliography |
| hovyn_de_tronchere             | Loubert rose garden              | 9  | 43.7  | 1899    | T       | no | Puyravaud        | FranceSW      | 2       | Bibliography |
| hume_s_blush_tea_scented_china | Loubert rose garden              | 9  | 61.4  | 1809    | T       | no | Unknown          | China         | 2       | Measured     |
| huntington_la_biche            | Désert rose garden               | 9  | 70.0  | 1851    | T       | no | Robert           | FranceAngers  | 2       | Bibliography |
| imperatrice_eugenie            | Val de Marne rose garden         | 5  | 60.0  | 1854    | HP      | no | Oger             | FranceNW      | 4       | Bibliography |
| imperatrice_josephine          | Loubert rose garden              | 2  | 91.1  | 1815    | HGal    | no | Descemet         | FranceParis   | 4       | Bibliography |
| ina_bingham                    | Val de Marne rose garden         | 8  | 96.9  | 1906    | HP      | no | Dickson          | EuropeN       | 4       | Bibliography |
| incomparable_d_ateuil          | Val de Marne rose garden         | 3  | 85.1  | 1828    | C       | no | Laffay           | FranceParis   | 4       | Bibliography |
| inconnu_av_juliette_adam       | SCRADH                           | 9  | 46.9  | Unknown | Unknown | no | Unknown          | Unknown       | Unknown | Unknown      |
| inconnu_golf_juan              | SCRADH                           | 9  | 65.3  | Unknown | Unknown | no | Unknown          | Unknown       | Unknown | Unknown      |
| inconnu_saint_tropez           | SCRADH                           | 9  | 60.8  | Unknown | Unknown | no | Unknown          | Unknown       | Unknown | Unknown      |
| indigo                         | Loubert rose garden              | 2  | 85.1  | 1830    | D       | no | Laffay           | FranceParis   | 4       | Measured     |
| ingrid_bergman                 | La Beaujoire rose garden         | 9  | 58.9  | 1985    | HT      | no | Poulsen          | EuropeN       | 4       | Bibliography |
| irene_bonnet                   | SCRADH                           | 8  | 68.6  | 1920    | HT      | no | Nabonnand        | FranceSE      | 4       | Bibliography |
| irene_watts                    | Désert rose garden               | 8  | 79.2  | 1895    | Ch      | no | Guillot          | FranceLyon    | Unknown | Unknown      |
| isabelle_nabonnand             | SCRADH                           | 9  | 75.3  | 1873    | T       | no | Nabonnand        | FranceSE      | 2       | Bibliography |
| ispahan                        | Loubert rose garden              | 3  | 69.2  | 1827    | D       | no | Unknown          | Middle_East   | 4       | Measured     |
| jacques_amyot                  | Désert rose garden               | 6  | 49.6  | 1849    | N       | no | Varangot         | FranceParis   | Unknown | Unknown      |
| jacques_cartier                | Val de Marne rose garden         | 4  | 51.3  | 1868    | P       | no | Desprez          | FranceParis   | 4       | Bibliography |
| jacques_cartier_bianc          | Loubert rose garden              | 5  | 80.7  | 1868    | P       | no | Pedersen         | EuropeN       | 4       | Bibliography |
| james_bourgault                | Jumaju rose garden               | 5  | 66.5  | 1864    | HP      | no | Verdier          | FranceParis   | 4       | Bibliography |
| james_mitchel                  | Loubert rose garden              | 3  | 51.7  | 1861    | M       | no | Verdier          | FranceParis   | 4       | Measured     |
| james_veitch                   | La Cour de Commer rose garden    | 16 | 100.0 | 1864    | M       | no | Verdier          | FranceParis   | 4       | Bibliography |
| janet_s_pride                  | Loubert rose garden              | 3  | 52.8  | 1894    | HEg     | no | Descemet         | FranceParis   | 4       | Measured     |
| jean_andre                     | Jardin botanique de la Tête d'Or | 9  | 68.3  | 1893    | T       | no | Pelletier        | FranceParis   | 2       | Bibliography |
| jean_bach_sisley               | Loubert rose garden              | 9  | 36.4  | 1898    | Ch      | no | Dubreuil         | FranceLyon    | 2       | Measured     |
| jean_bodin                     | La Cour de Commer rose garden    | 10 | 96.4  | 1846    | M       | no | Vibert           | FranceAngers  | 4       | Bibliography |
| jean_ducher                    | Loubert rose garden              | 8  | 42.7  | 1874    | T       | no | Ducher           | FranceLyon    | 2       | Bibliography |
| jean_girin                     | Val de Marne rose garden         | 9  | 44.2  | 1910    | HWich   | no | Girin            | FranceLyon    | 2       | Bibliography |
| jean_lorthis                   | Val de Marne rose garden         | 9  | 47.1  | 1879    | HT      | no | Ducher           | FranceLyon    | 4       | Bibliography |
| jeanne_d_arc                   | Loubert rose garden              | 10 | 94.2  | 1818    | A       | no | Vibert           | FranceParis   | 2       | Measured     |
| jeanne_d_arc_alba              | Loubert rose garden              | 16 | 100.0 | 1818    | A       | no | Vibert           | FranceParis   | 6       | Measured     |
| jeanne_drivon                  | Grande roseraie de Lyon          | 6  | 60.1  | 1883    | Pol     | no | Schwartz         | FranceLyon    | Unknown | Unknown      |
| jeanne_hachette                | La Cour de Commer rose garden    | 2  | 86.4  | 1842    | HGal    | no | Vibert           | FranceAngers  | 4       | Bibliography |
| jenny_duval                    | Loubert rose garden              | 2  | 91.8  | 1842    | HGal    | no | Duval            | FranceParis   | 4       | Measured     |
| jersey_beauty                  | Loubert rose garden              | 9  | 57.7  | 1899    | HWich   | no | Horvath          | America       | 2       | Bibliography |
| jeune_henry                    | Jumaju rose garden               | 8  | 44.2  | 1815    | P       | no | Descemet         | FranceParis   | 4       | Bibliography |
| jiminy_cricket                 | Jumaju rose garden               | 5  | 65.3  | 1954    | F       | no | Boemer           | America       | 3       | Bibliography |
| john_cranston                  | La Cour de Commer rose garden    | 2  | 82.3  | 1861    | M       | no | Verdier          | FranceParis   | 4       | Bibliography |
| john_hopper                    | Jumaju rose garden               | 8  | 81.8  | 1862    | HP      | no | Ward             | EuropeN       | 4       | Bibliography |
| john_ruskin                    | Val de Marne rose garden         | 8  | 76.6  | 1903    | HT      | no | Dickson          | EuropeN       | 4       | Bibliography |
| josephine_de_beaucharnais      | Loubert rose garden              | 4  | 72.1  | 1865    | HP      | no | Guillot          | FranceLyon    | 4       | Measured     |
| josephine_ritter               | Loubert rose garden              | 5  | 67.9  | 1900    | HMult   | no | Geschwind        | EuropeW       | 2       | Bibliography |
| jules_graveaux                 | Loubert rose garden              | 9  | 48.4  | 1908    | Unknown | no | Pernet-Ducher    | FranceLyon    | Unknown | Unknown      |
| jules_margottin                | Loubert rose garden              | 5  | 91.5  | 1852    | HP      | no | Margottin        | FranceParis   | 4       | Measured     |
| jules_toussaint                | Val de Marne rose garden         | 8  | 76.2  | 1900    | HT      | no | Bonnaire         | FranceLyon    | 4       | Bibliography |

|                            |                                  |    |       |         |      |       |    |                                     |               |         |              |
|----------------------------|----------------------------------|----|-------|---------|------|-------|----|-------------------------------------|---------------|---------|--------------|
| julie_d_estanges           | Val de Marne rose garden         | 3  | 45.2  |         | 1834 | HGal  | no | Vibert                              | FranceParis   | 4       | Bibliography |
| julie_de_mersan            | Loubert rose garden              | 2  | 54.4  |         | 1854 | M     | no | Thomas                              | FranceNW      | 4       | Measured     |
| julie_de_mersan            | Loubert rose garden              | 2  | 47.5  |         | 1854 | M     | no | Thomas                              | FranceNW      | 4       | Measured     |
| julie_krudner              | Val de Marne rose garden         | 2  | 88.5  |         | 1847 | P     | no | Laffay                              | FranceParis   | 4       | Bibliography |
| juliette                   | Val de Marne rose garden         | 2  | 92.8  |         | 1828 | HGal  | no | Miellez                             | FranceNW      | 4       | Bibliography |
| just_joey                  | La Beaujoire rose garden         | 8  | 91.1  |         | 1972 | HT    | no | Roger_Pawsey_Of_Cants_Of_Colchester | EuropeN       | 4       | Bibliography |
| justine_ramet              | La Cour de Commer rose garden    | 2  | 85.8  |         | 1845 | C     | no | Vibert                              | FranceAngers  | 4       | Bibliography |
| katharina_zeimet           | Val de Marne rose garden         | 10 | 95.2  |         | 1901 | Pol   | no | Lambert                             | EuropeW       | 2       | Bibliography |
| kazanlik                   | Jardin botanique de la Tête d'Or | 4  | 48.2  |         | 1612 | D     | no | Unknown                             | Middle_East   | 4       | Bibliography |
| kean                       | La Cour de Commer rose garden    | 2  | 70.2  |         | 1843 | HGal  | no | Laffay                              | FranceParis   | 4       | Bibliography |
| kiese                      | Val de Marne rose garden         | 15 | 99.9  |         | 1910 | S     | no | Kiese                               | EuropeW       | 5       | Bibliography |
| killarney                  | Loubert rose garden              | 6  | 43.3  |         | 1898 | HT    | no | Dickson                             | EuropeN       | 3       | Measured     |
| king_of_siam               | Désert rose garden               | 8  | 31.7  |         | 1825 | HT    | no | Laffay                              | FranceParis   | Unknown | Unknown      |
| knock_out                  | INRA Angers                      | 9  | 35.6  |         | 1988 | S     | no | Radler                              | America       | 3       | Bibliography |
| Konigin_von_Danemark       | La Cour de Commer rose garden    | 6  | 67.1  |         | 1816 | A     | no | Booth                               | EuropeW       | Unknown | Unknown      |
| kronprinzessin_viktoria    | Val de Marne rose garden         | 8  | 88.9  |         | 1888 | B     | no | Volvert                             | Unknown       | 4       | Bibliography |
| L_enchanteresse            | Val de Marne rose garden         | 2  | 69.5  |         | 1826 | HGal  | no | Francois                            | EuropeW       | 4       | Bibliography |
| L_esperance                | Val de Marne rose garden         | 5  | 79.6  |         | 1871 | HP    | no | Lartay                              | FranceParis   | 4       | Bibliography |
| L_eveque                   | Jumaju rose garden               | 4  | 51.5  |         | 1790 | HGal  | no | Volvert                             | France        | 4       | Bibliography |
| L_invincible               | La Cour de Commer rose garden    | 2  | 88.5  |         | 1819 | HGal  | no | Miellez                             | FranceNW      | 4       | Bibliography |
| L_ouche                    | Loubert rose garden              | 6  | 70.4  |         | 1901 | HCh   | no | Buatois                             | FranceNE      | 4       | Measured     |
| 19_laos                    | Désert rose garden               | 10 | 31.9  |         | 2008 | Ch    | no | Maebara                             | China         | Unknown | Unknown      |
| la_belle_distinguee        | Loubert rose garden              | 2  | 56.7  |         | 1811 | HEg   | no | Unknown                             | Unknown       | 4       | Measured     |
| la_belle_sultane           | La Cour de Commer rose garden    | 2  | 92.2  |         | 1795 | HGal  | no | Unknown                             | EuropeW       | 4       | Bibliography |
| la_biche                   | Loubert rose garden              | 9  | 61.5  |         | 1832 | N     | no | Toullier                            | FranceParis   | 2       | Measured     |
| la_caille                  | Loubert rose garden              | 4  | 63.8  |         | 1857 | M     | no | Moreau & Robert                     | FranceAngers  | 4       | Bibliography |
| la_favorite                | Loubert rose garden              | 8  | 80.2  |         | 1899 | HT    | no | Schwartz                            | FranceLyon    | 3       | Measured     |
| la_france                  | Loubert rose garden              | 8  | 96.0  |         | 1867 | HT    | no | Guillot                             | FranceLyon    | 3       | Measured     |
| la_france_cl               | Val de Marne rose garden         | 8  | 96.3  |         | 1893 | HT    | no | Henderson                           | America       | 4       | Bibliography |
| la_gloire_des_jardins      | La Cour de Commer rose garden    | 2  | 92.6  |         | 1815 | HGal  | no | Descemet                            | FranceParis   | 4       | Bibliography |
| la_louise                  | Jumaju rose garden               | 2  | 88.8  |         | 1840 | HGal  | no | Parmentier                          | EuropeW       | 4       | Bibliography |
| la_nationale               | La Cour de Commer rose garden    | 2  | 80.7  |         | 1836 | HGal  | no | Unknown                             | Unknown       | 4       | Bibliography |
| la_negresse                | Loubert rose garden              | 4  | 61.8  |         | 1842 | D     | no | Vibert                              | FranceAngers  | 3       | Measured     |
| la_noblesse                | Loubert rose garden              | 5  | 58.0  |         | 1857 | C     | no | Souper & Notting                    | EuropeW       | 4       | Measured     |
| la_noblesse                | Loubert rose garden              | 5  | 74.6  |         | 1857 | C     | no | Souper & Notting                    | EuropeW       | 4       | Measured     |
| la_perle                   | Val de Marne rose garden         | 11 | 52.2  |         | 1904 | HWich | no | Fauque                              | FranceOrleans | 2       | Bibliography |
| la_pucelle                 | Val de Marne rose garden         | 4  | 68.7  |         | 1811 | HGal  | no | Dubourg                             | FranceParis   | 4       | Bibliography |
| la_reine                   | Grande roseraie de Lyon          | 9  | 71.5  |         | 1842 | HP    | no | Laffay                              | FranceParis   | 4       | Bibliography |
| la_revenante               | Val de Marne rose garden         | 2  | 98.3  |         | 1825 | HGal  | no | Miellez                             | FranceNW      | 4       | Bibliography |
| la_rose_d_york             | Jardin botanique de la Tête d'Or | 16 | 100.0 |         | 1629 | A     | no | Unknown                             | Europe        | 6       | Bibliography |
| la_rubanee                 | Loubert rose garden              | 14 | 100.0 |         | 1839 | HGal  | no | Vibert                              | FranceParis   | 4       | Measured     |
| la_sevillana               | La Beaujoire rose garden         | 8  | 80.5  |         | 1978 | F     | no | Meilland                            | FranceSE      | 3       | Bibliography |
| la_sirene                  | Loubert rose garden              | 6  | 42.5  |         | 1875 | HP    | no | Souper & Notting                    | EuropeW       | 4       | Measured     |
| la_tosca                   | Grande roseraie de Lyon          | 8  | 84.2  |         | 1900 | HT    | no | Schwartz                            | FranceLyon    | 4       | Bibliography |
| la_vierzonnaise            | Val de Marne rose garden         | 5  | 86.3  |         | 1893 | HP    | no | Andre                               | FranceParis   | 4       | Bibliography |
| la_virginale               | Jumaju rose garden               | 4  | 72.7  |         | 1400 | A     | no | Unknown                             | Middle_East   | 6       | Bibliography |
| lady_dunmore               | Val de Marne rose garden         | 13 | 99.1  |         | 1906 | HSpn  | no | Unknown                             | EuropeN       | 4       | Bibliography |
| lady_edine                 | Val de Marne rose garden         | 13 | 99.5  |         | 1906 | HSpn  | no | Unknown                             | EuropeN       | 4       | Bibliography |
| lady_emily_peel            | Jumaju rose garden               | 6  | 45.5  |         | 1862 | N     | no | Lacharme                            | FranceLyon    | 4       | Measured     |
| lady_mary_cory             | Loubert rose garden              | 15 | 100.0 |         | 1901 | T     | no | Dickson                             | EuropeN       | 5       | Measured     |
| lady_penzance              | Désert rose garden               | 14 | 100.0 |         | 1894 | HEg   | no | Penzance                            | EuropeN       | 6       | Bibliography |
| lady_waterlow              | SCRADH                           | 8  | 49.3  |         | 1902 | HT    | no | Nabonnand                           | FranceSE      | 4       | Bibliography |
| lamotte_sanguin            | Loubert rose garden              | 5  | 67.9  |         | 1869 | HP    | no | Vigeneron                           | FranceAngers  | 4       | Measured     |
| lane                       | La Cour de Commer rose garden    | 3  | 52.0  |         | 1845 | M     | no | Robert                              | FranceAngers  | 4       | Bibliography |
| laneii                     | Jumaju rose garden               | 3  | 62.1  |         | 1845 | M     | no | Laffay                              | FranceParis   | 4       | Bibliography |
| las_casas                  | Loubert rose garden              | 6  | 65.3  |         | 1828 | B     | no | Vibert                              | FranceParis   | Unknown | Unknown      |
| laurent_heister            | Val de Marne rose garden         | 2  | 75.7  |         | 1859 | P     | no | Moreau & Robert                     | FranceAngers  | 4       | Bibliography |
| le_cid                     | Val de Marne rose garden         | 12 | 95.2  |         | 1909 | HRg   | no | Vigeneron                           | FranceAngers  | 2       | Bibliography |
| le_loberde                 | La Cour de Commer rose garden    | 2  | 90.1  |         | 1800 | M     | no | Unknown                             | France        | 4       | Bibliography |
| le_pactole                 | Loubert rose garden              | 9  | 48.2  |         | 1841 | T     | no | Miellez                             | FranceNW      | 2       | Bibliography |
| le_poilu                   | Jumaju rose garden               | 2  | 86.0  |         | 1915 | HWich | no | Barbier                             | FranceOrleans | 4       | Bibliography |
| le_rire_niais              | La Cour de Commer rose garden    | 15 | 100.0 |         | 1810 | C     | no | Dupont                              | FranceParis   | 4       | Bibliography |
| lea                        | Loubert rose garden              | 2  | 78.1  |         | 1825 | HGal  | no | Vetillard                           | FranceAngers  | 4       | Measured     |
| leda                       | Loubert rose garden              | 2  | 85.1  |         | 1827 | D     | no | Unknown                             | EuropeN       | 4       | Measured     |
| lena_turner                | Jumaju rose garden               | 6  | 34.6  |         | 1869 | HP    | no | Verdier                             | FranceParis   | 4       | Bibliography |
| leon_robichon              | Val de Marne rose garden         | 8  | 58.8  |         | 1902 | HP    | no | Robichon                            | FranceOrleans | 4       | Bibliography |
| leonardo_de_vinci          | La Beaujoire rose garden         | 8  | 60.7  |         | 1994 | F     | no | Meilland                            | FranceSE      | 3       | Bibliography |
| leonie_lamesch             | Jumaju rose garden               | 9  | 35.2  |         | 1900 | Pol   | no | Lambert                             | EuropeW       | Unknown | Unknown      |
| leontine_gervais           | Val de Marne rose garden         | 9  | 67.4  |         | 1903 | HWich | no | Barbier                             | FranceOrleans | 2       | Bibliography |
| leopold_ritter             | Loubert rose garden              | 6  | 60.2  |         | 1899 | HMult | no | Geschwind                           | EuropeW       | 4       | Measured     |
| les_saisons_d_italie       | La Cour de Commer rose garden    | 15 | 100.0 | Unknown |      | HGal  | no | Unknown                             | Unknown       | 4       | Bibliography |
| leuchtstern                | Loubert rose garden              | 10 | 99.6  |         | 1889 | HMult | no | Kiese                               | EuropeW       | 2       | Measured     |
| ley_s_perpetual            | Désert rose garden               | 8  | 40.4  |         | 1863 | HT    | no | Damaizan                            | EuropeN       | 2       | Bibliography |
| li_jiang_yellow            | Désert rose garden               | 10 | 86.4  | Unknown |      | T     | no | Maebara                             | China         | 2       | Bibliography |
| lieutenant_chaure          | Val de Marne rose garden         | 8  | 74.3  |         | 1909 | HT    | no | Pernet-Ducher                       | FranceLyon    | 4       | Bibliography |
| lijiang_rose               | Désert rose garden               | 10 | 86.6  |         | 1995 | HG    | no | Osti                                | China         | Unknown | Unknown      |
| lijiang_yellow_tea         | Désert rose garden               | 10 | 96.0  |         | 1995 | T     | no | Maebara                             | China         | Unknown | Unknown      |
| illy_mertschersky          | Jumaju rose garden               | 6  | 66.2  |         | 1878 | N     | no | Nabonnand                           | FranceSE      | 2       | Bibliography |
| isette_de_beranger         | Val de Marne rose garden         | 6  | 62.1  |         | 1867 | HP    | no | Moreau                              | FranceAngers  | 4       | Bibliography |
| lord_penzance              | Loubert rose garden              | 14 | 100.0 |         | 1894 | HEg   | no | Penzance                            | EuropeN       | 5       | Measured     |
| lord_raglan                | Jumaju rose garden               | 8  | 79.2  |         | 1854 | HP    | no | Guillot                             | FranceLyon    | 4       | Bibliography |
| louis_de_funes             | La Beaujoire rose garden         | 9  | 36.7  |         | 1987 | HT    | no | Meilland                            | FranceSE      | 4       | Bibliography |
| louis_lille                | Loubert rose garden              | 2  | 90.9  |         | 1887 | HP    | no | Dubreuil                            | FranceLyon    | 4       | Bibliography |
| louis_noicette             | Val de Marne rose garden         | 8  | 62.0  |         | 1864 | HP    | no | Ducher                              | FranceLyon    | 4       | Bibliography |
| louis_van_tyll             | Val de Marne rose garden         | 2  | 90.9  |         | 1846 | HGal  | no | Unknown                             | EuropeW       | 4       | Bibliography |
| louis_catherine_breslau_cl | Val de Marne rose garden         | 4  | 65.1  |         | 1917 | HT    | no | Kordes                              | EuropeW       | Unknown | Unknown      |
| louise_d_arzens            | Loubert rose garden              | 8  | 42.0  |         | 1861 | N     | no | Lacharme                            | FranceLyon    | 4       | Measured     |
| louise_odier               | Jardin botanique de la Tête d'Or | 6  | 64.9  |         | 1851 | B     | no | Margottin                           | FranceParis   | 4       | Bibliography |
| louise_verger              | La Cour de Commer rose garden    | 8  | 62.1  |         | 1860 | M     | no | Moreau & Robert                     | FranceAngers  | 4       | Bibliography |
| lucile_duplessis           | La Cour de Commer rose garden    | 2  | 91.7  |         | 1854 | M     | no | Robert                              | FranceAngers  | 4       | Bibliography |
| lucien_de_lemos            | Val de Marne rose garden         | 8  | 93.1  |         | 1905 | HT    | no | Lambert                             | EuropeW       | 4       | Bibliography |
| lucy_bertram               | Val de Marne rose garden         | 14 | 100.0 |         | 1895 | HEg   | no | Penzance                            | EuropeN       | 5       | Bibliography |
| lycoris                    | Val de Marne rose garden         | 2  | 80.3  |         | 1835 | HGal  | no | Vibert                              | FranceParis   | Unknown | Unknown      |
| m_a_maille                 | Val de Marne rose garden         | 6  | 64.9  |         | 1889 | B     | no | Robert                              | FranceAngers  | 4       | Bibliography |
| m_cordeau                  | Loubert rose garden              | 8  | 94.0  |         | 1892 | B     | no | Moreau & Robert                     | FranceAngers  | 4       | Bibliography |
| m_de_montigny              | Val de Marne rose garden         | 5  | 84.3  |         | 1855 | HP    | no | Paillet                             | FranceParis   | 4       | Bibliography |
| m_francisque_rives         | Val de Marne rose garden         | 8  | 54.3  |         | 1883 | HP    | no | Schwartz                            | FranceParis   | 4       | Bibliography |
| m_helye                    | Val de Marne rose garden         | 10 | 89.3  |         | 1889 | HRg   | no | Morlet                              | FranceNE      | 2       | Bibliography |
| m_louis_ricard             | Val de Marne rose garden         | 6  | 47.8  |         | 1894 | HP    | no | Boutigny                            | FranceNW      | 4       | Bibliography |
| m_tillier                  | Désert rose garden               | 9  | 55.5  |         | 1891 | T     | no | Bernaix                             | FranceLyon    | 2       | Bibliography |
| ma_tulipe                  | Grande roseraie de Lyon          | 9  | 65.1  |         | 1899 | HT    | no | Bonnaire                            | FranceLyon    | 4       | Bibliography |
| mabel_morrison             | Val de Marne rose garden         | 6  | 51.8  |         | 1878 | HP    | no | Broughton                           | EuropeN       | 4       | Bibliography |
| magna_charta               | Loubert rose garden              | 5  | 90.2  |         | 1876 | HP    | no | Paul                                | EuropeN       | 4       | Measured     |
| maiden_s_blush_small       | Val de Marne rose garden         | 4  | 71.8  |         | 1797 | A     | no | Kew                                 | EuropeN       | 6       | Bibliography |
| maitland_white             | Désert rose garden               | 10 | 94.8  | Unknown |      | T     | no | Unknown                             | America       | 2       | Bibliography |
| malesherbes                | La Cour de Commer rose garden    | 2  | 94.0  |         | 1836 | HGal  | no | Vibert                              | FranceParis   | Unknown | Unknown      |
| malvina                    | Loubert rose garden              | 2  | 76.7  |         | 1841 | C     | no | Verdier/Vibert                      | FranceParis   | 4       | Bibliography |
| manteau_pourpre            | Loubert rose garden              | 2  | 92.2  |         | 1810 | HGal  | no | Vibert                              | FranceParis   | 4       | Bibliography |
| marbree                    | Loubert rose garden              | 2  | 62.8  |         | 1858 | P     | no | Moreau & Robert                     | FranceAngers  | 4       | Bibliography |
| marcel_bourgoing           | Val de Marne rose garden         | 12 | 100.0 |         | 1899 | HGal  | no | Corboeuf                            | FranceOrleans | 4       | Bibliography |
| marchionnes_of_salisbury   | Loubert rose garden              | 6  | 61.8  |         | 1890 | HT    | no | Pernet                              | FranceLyon    | 4       | Bibliography |
| marechal_niel              | Val de Marne rose garden         | 9  | 69.0  |         | 1864 | N     | no | Castel                              | France        | 2       | Bibliography |
| margaret_haywood           | Val de Marne rose garden         | 5  | 73.4  |         | 1889 | HP    | no | Haywood                             | EuropeN       | 4       | Bibliography |
| marguerite_de_roman        | Loubert rose garden              | 5  | 82.5  |         | 1882 | HP    | no | Schwartz                            | FranceLyon    | 4       | Measured     |
| marguerite_desrayaux       | Jardin botanique de la Tête d'Or | 9  | 45.9  |         | 1906 | N     | no | Nabonnand                           | FranceSE      | Unknown | Unknown      |
| marie_accary               | Désert rose garden               | 6  | 56.9  |         | 1872 | N     | no | Guillot                             | FranceLyon    | 3       | Measured     |
| marie_baumann              | Jumaju rose garden               | 6  | 38.3  |         | 1863 | HP    | no | Baumann                             | FranceNE      | Unknown | Unknown      |
| marie_boisse               | Val de Marne rose garden         | 4  | 51.6  |         | 1864 | HP    | no | Oger                                | FranceNW      | 4       | Bibliography |
| marie_de_saint_jean        | Val de Marne rose garden         | 2  | 79.0  |         | 1869 | P     | no | Damaizin                            | FranceLyon    | 4       | Bibliography |

|                               |                                  |    |       |      |       |    |                             |               |         |              |
|-------------------------------|----------------------------------|----|-------|------|-------|----|-----------------------------|---------------|---------|--------------|
| marie_dermar                  | Loubert rose garden              | 6  | 62.6  | 1889 | N     | no | Geschwind                   | EuropeW       | 4       | Measured     |
| marie_dermar                  | Loubert rose garden              | 10 | 90.3  | 1889 | N     | no | Geschwind                   | EuropeW       | 4       | Measured     |
| marie_ducher                  | Private donations                | 9  | 45.9  | 1868 | T     | no | Ducher                      | FranceLyon    | 2       | Bibliography |
| marie_lecinska                | La Cour de Commer rose garden    | 3  | 85.3  | 1860 | M     | no | Béluze                      | FranceLyon    | 4       | Bibliography |
| marie_pavie                   | Jumaju rose garden               | 7  | 32.9  | 1888 | Pol   | no | Alégatière                  | FranceLyon    | 2       | Bibliography |
| marie_robert                  | Val de Marne rose garden         | 9  | 57.8  | 1893 | N     | no | Cochet                      | FranceParis   | 2       | Measured     |
| marie_therese_dubourg         | Jumaju rose garden               | 5  | 46.8  | 1888 | N     | no | Godard                      | FranceParis   | 4       | Measured     |
| marie-louise                  | La Cour de Commer rose garden    | 1  | 62.2  | 1811 | D     | no | Unknown                     | EuropeW       | 4       | Bibliography |
| marjolin                      | Val de Marne rose garden         | 15 | 100.0 | 1842 | HGal  | no | Roeser                      | FranceParis   | 4       | Bibliography |
| marquise_boccella             | Jumaju rose garden               | 5  | 61.1  | 1842 | HP    | no | Desprez                     | FranceParis   | 4       | Bibliography |
| marquise_d_exeter             | Val de Marne rose garden         | 5  | 86.6  | 1877 | HP    | no | Laxton                      | EuropeN       | 4       | Bibliography |
| marquise_de_mortemart         | Val de Marne rose garden         | 5  | 86.5  | 1868 | HP    | no | Liabaud                     | FranceLyon    | 4       | Bibliography |
| mary_pochin                   | Val de Marne rose garden         | 2  | 61.8  | 1881 | HP    | no | Pochin                      | EuropeN       | 4       | Bibliography |
| maupertuis                    | Loubert rose garden              | 2  | 86.3  | 1868 | M     | no | Moreau & Robert             | FranceAngers  | 4       | Measured     |
| may_queen                     | Loubert rose garden              | 7  | 41.6  | 1898 | HWich | no | Van Fleet                   | America       | 2       | Bibliography |
| meg_merillies                 | Loubert rose garden              | 14 | 100.0 | 1893 | HEg   | no | Penzance                    | EuropeN       | 6       | Measured     |
| melanie_waldor                | La Cour de Commer rose garden    | 4  | 55.5  | 1865 | M     | no | Moreau & Robert             | FranceAngers  | 4       | Bibliography |
| melle_de_sombreuil            | Loubert rose garden              | 9  | 61.2  | 1851 | T     | no | Robert                      | FranceAngers  | 4       | Measured     |
| menage                        | La Cour de Commer rose garden    | 2  | 93.8  | 1847 | A     | no | Vibert                      | FranceAngers  | 4       | Bibliography |
| mercedes                      | Loubert rose garden              | 2  | 93.1  | 1847 | HGal  | no | Vibert                      | FranceAngers  | 4       | Measured     |
| merville_de_lyon              | Grande roseraie de Lyon          | 5  | 50.0  | 1882 | HP    | no | Pernet                      | FranceLyon    | 4       | Bibliography |
| meteor                        | Loubert rose garden              | 6  | 63.4  | 1836 | N     | no | Geschwind                   | EuropeW       | 4       | Measured     |
| mignon                        | Val de Marne rose garden         | 9  | 53.4  | 1881 | Pol   | no | Ducher                      | FranceLyon    | 2       | Bibliography |
| mignonette                    | Jumaju rose garden               | 10 | 97.8  | 1881 | Pol   | no | Guillot                     | FranceLyon    | 2       | Bibliography |
| minette                       | Loubert rose garden              | 3  | 64.2  | 1819 | C     | no | Vibert                      | FranceParis   | 4       | Measured     |
| miniature                     | Val de Marne rose garden         | 10 | 99.6  | 1885 | Pol   | no | Alégatière                  | FranceLyon    | 2       | Bibliography |
| minnehaha                     | Val de Marne rose garden         | 11 | 46.5  | 1902 | HWich | no | Walsh                       | America       | 2       | Bibliography |
| miranda                       | Loubert rose garden              | 3  | 50.5  | 1869 | P     | no | Sansal                      | FranceParis   | 4       | Measured     |
| mistress_f_w_flight           | Val de Marne rose garden         | 10 | 45.5  | 1906 | HMult | no | Cutbush                     | EuropeN       | Unknown | Unknown      |
| mistress_g_dickson            | Val de Marne rose garden         | 6  | 63.4  | 1885 | HP    | no | Bennett                     | EuropeN       | 4       | Bibliography |
| mistress_reynolds_hole        | SCRADH                           | 6  | 34.6  | 1901 | T     | no | Nabonnand                   | FranceSE      | 2       | Bibliography |
| mistress_rumsey               | Val de Marne rose garden         | 9  | 36.4  | 1899 | HP    | no | Rumsey                      | Unknown       | 4       | Bibliography |
| mistress_w_h_cutbush          | Val de Marne rose garden         | 10 | 87.2  | 1904 | Pol   | no | Levasseur                   | FranceOrleans | 2       | Bibliography |
| mle_blanche_durrschmidt       | Val de Marne rose garden         | 6  | 64.5  | 1877 | T     | no | Guillot                     | FranceLyon    | 4       | Measured     |
| mle_cecile_brunner            | Loubert rose garden              | 9  | 66.2  | 1880 | Pol   | no | Ducher                      | FranceLyon    | 2       | Bibliography |
| mle_cecile_brunner            | Désert rose garden               | 7  | 41.9  | 1880 | Pol   | no | Ducher                      | FranceLyon    | 2       | Bibliography |
| mle_cecile_brunner_cl         | Désert rose garden               | 9  | 66.8  | 1894 | Pol   | no | Hosp                        | America       | 2       | Bibliography |
| mle_elisa_lemasson            | Val de Marne rose garden         | 6  | 38.1  | 1849 | HT    | no | Vibert                      | FranceAngers  | 4       | Bibliography |
| mle_genevieve_godard          | Désert rose garden               | 9  | 56.0  | 1889 | T     | no | Godard                      | FranceLyon    | 2       | Bibliography |
| mle_josephine_guyot           | Val de Marne rose garden         | 6  | 62.0  | 1863 | B     | no | Touvais                     | FranceParis   | 4       | Bibliography |
| mle_marie_dauvesse            | Jumaju rose garden               | 4  | 61.3  | 1859 | HP    | no | Vignerons                   | FranceAngers  | Unknown | Unknown      |
| mle_marie_gaze                | Jumaju rose garden               | 9  | 72.3  | 1892 | N     | no | Godard                      | FranceLyon    | 2       | Measured     |
| mle_marie_van_houtte          | Désert rose garden               | 9  | 69.8  | 1871 | T     | no | Ducher                      | FranceLyon    | 2       | Bibliography |
| mme_abel_chatenay             | Loubert rose garden              | 9  | 71.7  | 1894 | HT    | no | Pernet-Ducher               | FranceLyon    | 2       | Measured     |
| mme_alexandre_julien          | Val de Marne rose garden         | 8  | 86.9  | 1882 | HP    | no | Vignerons                   | FranceAngers  | 4       | Bibliography |
| mme_alexandre_pommery         | Val de Marne rose garden         | 5  | 54.7  | 1882 | HP    | no | Lévêque                     | FranceParis   | 4       | Bibliography |
| mme_alfred_carriere           | Val de Marne rose garden         | 9  | 72.4  | 1875 | N     | no | Schwartz                    | FranceLyon    | 3       | Measured     |
| mme_alfred_de_rougemont       | Val de Marne rose garden         | 9  | 69.6  | 1862 | HP    | no | Lacharme                    | FranceLyon    | Unknown | Unknown      |
| mme_alice_dureau              | Val de Marne rose garden         | 5  | 72.4  | 1867 | HP    | no | Vignerons                   | FranceAngers  | 4       | Bibliography |
| mme_alphonse_seux             | Jumaju rose garden               | 2  | 80.2  | 1887 | HP    | no | Liabaud                     | FranceLyon    | 4       | Bibliography |
| mme_anatole_leroy             | Val de Marne rose garden         | 6  | 68.1  | 1892 | HP    | no | Leroy                       | FranceAngers  | 4       | Bibliography |
| mme_antoine_mari              | Loubert rose garden              | 9  | 54.7  | 1890 | T     | no | Mari                        | FranceSE      | 2       | Bibliography |
| mme_azelie_imbert             | Jardin botanique de la Tête d'Or | 9  | 46.6  | 1870 | T     | no | Levet                       | FranceLyon    | Unknown | Unknown      |
| mme_berard                    | Grande roseraie de Lyon          | 8  | 75.9  | 1870 | T     | no | Levet                       | FranceLyon    | 2       | Bibliography |
| mme_bertha_mackart            | Val de Marne rose garden         | 6  | 68.9  | 1883 | HP    | no | Verdier                     | FranceParis   | 4       | Bibliography |
| mme_blanche_lafitte           | Val de Marne rose garden         | 8  | 42.3  | 1851 | B     | no | Pradel                      | FranceSW      | 4       | Measured     |
| mme_boll                      | Loubert rose garden              | 4  | 72.9  | 1858 | HP    | no | Boll                        | America       | 4       | Measured     |
| mme_caroline_kuster           | Val de Marne rose garden         | 9  | 74.2  | 1872 | N     | no | Pernet                      | FranceLyon    | 3       | Measured     |
| mme_charles_verdier           | Val de Marne rose garden         | 5  | 90.4  | 1863 | HP    | no | Lacharme                    | FranceLyon    | 4       | Bibliography |
| mme_constans                  | Val de Marne rose garden         | 6  | 72.0  | 1902 | HWich | no | Roseraie_de_l'Hay-Les-Roses | FranceParis   | 2       | Bibliography |
| mme_crosy                     | Val de Marne rose garden         | 5  | 79.9  | 1881 | HP    | no | Levet                       | FranceLyon    | 4       | Bibliography |
| mme_cunisset_carnot           | Val de Marne rose garden         | 8  | 57.9  | 1899 | HT    | no | Buatois                     | FranceNE      | 4       | Bibliography |
| mme_d_arblay                  | Loubert rose garden              | 7  | 36.6  | 1835 | HMult | no | Wells                       | EuropeN       | 3       | Measured     |
| mme_d_hebray                  | Loubert rose garden              | 2  | 93.8  | 1857 | C     | no | Pradel                      | FranceSW      | 4       | Measured     |
| mme_dailleux                  | Val de Marne rose garden         | 8  | 95.3  | 1900 | HT    | no | Buatois                     | FranceNE      | 4       | Bibliography |
| mme_de_la_roche_lambert       | Loubert rose garden              | 4  | 72.4  | 1851 | M     | no | Robert                      | FranceAngers  | 4       | Measured     |
| mme_de_stael                  | Loubert rose garden              | 4  | 58.8  | 1857 | M     | no | Moreau & Robert             | FranceAngers  | 4       | Measured     |
| mme_de_watteville             | Grande roseraie de Lyon          | 9  | 66.4  | 1883 | T     | no | Guillot                     | FranceLyon    | 2       | Bibliography |
| mme_desire_giraud             | Val de Marne rose garden         | 5  | 84.4  | 1854 | HP    | no | Haussey                     | France        | 4       | Bibliography |
| mme_e_veyrat_hermanos         | Loubert rose garden              | 9  | 66.5  | 1895 | T     | no | Bernaix                     | FranceLyon    | 2       | Bibliography |
| mme_edouard_herriot           | Grande roseraie de Lyon          | 8  | 63.5  | 1913 | HT    | no | Pernet-Ducher               | FranceLyon    | Unknown | Unknown      |
| mme_edouard_michel            | Val de Marne rose garden         | 5  | 71.1  | 1886 | HP    | no | Verdier                     | FranceParis   | 4       | Bibliography |
| mme_edouard_ory               | Loubert rose garden              | 5  | 67.4  | 1854 | M     | no | Robert                      | FranceAngers  | 4       | Measured     |
| mme_emilie_charron            | Loubert rose garden              | 9  | 60.5  | 1895 | T     | no | Perrier                     | FranceAngers  | 2       | Measured     |
| mme_ernest_calvat             | Loubert rose garden              | 8  | 96.2  | 1888 | B     | no | Schwartz                    | FranceLyon    | 4       | Bibliography |
| mme_ernest_piard              | Loubert rose garden              | 8  | 41.7  | 1887 | HT    | no | Bonnaire                    | FranceLyon    | 4       | Measured     |
| mme_eugene_resal              | Grande roseraie de Lyon          | 9  | 67.5  | 1895 | Ch    | no | Guillot                     | FranceLyon    | Unknown | Unknown      |
| mme_falcot                    | Désert rose garden               | 9  | 57.7  | 1858 | T     | no | Guillot                     | FranceLyon    | 2       | Bibliography |
| mme_fanny_pauwels             | Désert rose garden               | 9  | 54.9  | 1884 | T     | no | Souper & Notting            | EuropeW       | 2       | Bibliography |
| mme_fillion                   | Jumaju rose garden               | 8  | 54.8  | 1865 | HP    | no | Gonod                       | FranceLyon    | 4       | Bibliography |
| mme_fortune_besson            | Val de Marne rose garden         | 8  | 86.8  | 1881 | HP    | no | Besson                      | FranceLyon    | 4       | Bibliography |
| mme_francois_pittet           | Jumaju rose garden               | 6  | 64.4  | 1877 | B     | no | Lacharme                    | FranceLyon    | 4       | Measured     |
| mme_georges_delbard           | La Beaujoire rose garden         | 8  | 74.3  | 1882 | HT    | no | Delbard                     | FranceParis   | 4       | Bibliography |
| mme_hardy                     | Loubert rose garden              | 3  | 50.1  | 1832 | D     | no | Hardy                       | FranceParis   | 4       | Measured     |
| mme_henry                     | Jardin botanique de la Tête d'Or | 9  | 66.2  | 1879 | N     | no | Ducher                      | FranceLyon    | 2       | Bibliography |
| mme_hersilie_ortgies          | Val de Marne rose garden         | 8  | 96.6  | 1868 | HP    | no | Souper & Notting            | EuropeW       | 4       | Bibliography |
| mme_j_bonnaire_pierre         | Val de Marne rose garden         | 6  | 68.3  | 1891 | HT    | no | Bonnaire                    | FranceLyon    | 4       | Bibliography |
| mme_jean_dupuy                | Grande roseraie de Lyon          | 9  | 62.4  | 1901 | T     | no | Lambert                     | EuropeW       | 2       | Bibliography |
| mme_joseph_schwartz           | Désert rose garden               | 9  | 50.5  | 1880 | T     | no | Schwartz                    | FranceLyon    | 2       | Bibliography |
| mme_josephine_burland         | Jumaju rose garden               | 9  | 44.4  | 1886 | Pol   | no | Bernaix                     | FranceLyon    | Unknown | Unknown      |
| mme_jules_bouche              | Grande roseraie de Lyon          | 5  | 68.5  | 1910 | HT    | no | Croibier                    | FranceLyon    | 4       | Bibliography |
| mme_jules_finger              | Val de Marne rose garden         | 8  | 67.6  | 1893 | HT    | no | Guillot                     | FranceLyon    | 4       | Bibliography |
| mme_jules_franke              | SCRADH                           | 9  | 50.4  | 1887 | N     | no | Nabonnand                   | FranceSE      | 4       | Measured     |
| mme_jules_gravereaux          | Grande roseraie de Lyon          | 8  | 65.8  | 1900 | T     | no | Souper & Notting            | EuropeW       | 2       | Bibliography |
| mme_jules_thibaud             | Jumaju rose garden               | 9  | 40.9  | 1830 | Pol   | no | Unknown                     | Unknown       | 2       | Bibliography |
| mme_julie_lasseu              | Désert rose garden               | 6  | 67.2  | 1881 | N     | no | Nabonnand                   | FranceSE      | 4       | Measured     |
| mme_knorr                     | Val de Marne rose garden         | 4  | 72.1  | 1865 | P     | no | Verdier                     | FranceParis   | 4       | Bibliography |
| mme_la_duchesse_d_auerstadt   | Jardin botanique de la Tête d'Or | 9  | 73.3  | 1887 | N     | no | Bernaix                     | FranceLyon    | 2       | Bibliography |
| mme_la_princesse_de_radziwill | Désert rose garden               | 9  | 51.3  | 1886 | T     | no | Nabonnand                   | FranceSE      | 2       | Bibliography |
| mme_lacharme                  | Val de Marne rose garden         | 8  | 93.4  | 1872 | HT    | no | Lacharme                    | FranceLyon    | 4       | Bibliography |
| mme_lambard                   | Loubert rose garden              | 9  | 51.7  | 1878 | T     | no | Lacharme                    | FranceLyon    | 2       | Measured     |
| mme_landeau                   | La Cour de Commer rose garden    | 2  | 91.1  | 1873 | M     | no | Moreau & Robert             | FranceAngers  | 4       | Bibliography |
| mme_laurent_simons            | Désert rose garden               | 9  | 46.4  | 1894 | T     | no | Lévêque                     | FranceParis   | 2       | Bibliography |
| mme_laurette_messimy          | Jumaju rose garden               | 9  | 55.0  | 1887 | Ch    | no | Guillot                     | FranceLyon    | 2       | Bibliography |
| mme_lauriol_de_barny          | Loubert rose garden              | 6  | 63.0  | 1867 | B     | no | Trouillard                  | FranceAngers  | 3       | Bibliography |
| mme_legrand                   | La Cour de Commer rose garden    | 3  | 52.1  | 1863 | M     | no | Fontaine                    | FranceParis   | 4       | Bibliography |
| mme_legras_de_st_germain      | Loubert rose garden              | 2  | 50.9  | 1846 | A     | no | Unknown                     | Unknown       | 4       | Measured     |
| mme_leon_constantin           | Grande roseraie de Lyon          | 8  | 96.5  | 1908 | T     | no | Bonnaire                    | FranceLyon    | 2       | Bibliography |
| mme_letuve_de_colnet          | Val de Marne rose garden         | 8  | 96.0  | 1887 | B     | no | Vignerons                   | FranceAngers  | 4       | Bibliography |
| mme_lierval                   | Loubert rose garden              | 6  | 59.6  | 1869 | HP    | no | Fontaine                    | FranceParis   | 4       | Measured     |
| mme_louis_blanchet            | Val de Marne rose garden         | 10 | 99.5  | 1894 | N     | no | Godard                      | FranceLyon    | 4       | Measured     |
| mme_louis_henry               | Val de Marne rose garden         | 9  | 57.7  | 1879 | N     | no | Ducher                      | FranceLyon    | 3       | Measured     |
| mme_louis_leveque             | Loubert rose garden              | 5  | 66.4  | 1898 | M     | no | Lévêque                     | FranceParis   | 4       | Measured     |
| mme_lucien_chaure             | Val de Marne rose garden         | 6  | 64.3  | 1884 | HP    | no | Vignerons                   | FranceAngers  | 4       | Bibliography |
| mme_lureau_escalais           | Val de Marne rose garden         | 6  | 50.6  | 1886 | HP    | no | Verdier                     | FranceParis   | 4       | Bibliography |
| mme_marthe_d_halloy           | Jumaju rose garden               | 6  | 44.1  | 1881 | HP    | no | Lévêque                     | FranceParis   | 4       | Bibliography |
| mme_masset                    | Val de Marne rose garden         | 9  | 33.0  | 1875 | B     | no | Lacharme                    | FranceLyon    | Unknown | Unknown      |
| mme_maurice_rivoire           | Val de Marne rose garden         | 6  | 61.2  | 1878 | HP    | no | Gonod                       | FranceLyon    | 4       | Bibliography |
| mme_montet                    | Val de Marne rose garden         | 6  | 70.3  | 1880 | HP    | no | Liabaud                     | FranceLyon    | 4       | Bibliography |

|                                |                                  |    |       |      |          |     |                       |               |         |              |
|--------------------------------|----------------------------------|----|-------|------|----------|-----|-----------------------|---------------|---------|--------------|
| mme_nerard                     | Val de Marne rose garden         | 6  | 59.6  | 1838 | B        | no  | Nerard                | FranceLyon    | 4       | Bibliography |
| mme_p_perny                    | Désert rose garden               | 9  | 46.6  | 1879 | T        | no  | Nabonnand             | FranceSE      | 2       | Bibliography |
| mme_philippe_plantamour        | Val de Marne rose garden         | 10 | 93.7  | 1898 | HRg      | no  | Unknown               | Unknown       | 2       | Bibliography |
| mme_pierre_cochet              | Jumaju rose garden               | 9  | 74.3  | 1891 | N        | no  | Cochet                | FranceParis   | 2       | Measured     |
| mme_plantier                   | Val de Marne rose garden         | 4  | 68.4  | 1835 | A        | no  | Plantier              | FranceLyon    | 3       | Bibliography |
| mme_platz                      | La Cour de Commer rose garden    | 4  | 68.5  | 1864 | M        | no  | Moreau & Robert       | FranceAngers  | 4       | Bibliography |
| mme_renaly                     | Jumaju rose garden               | 6  | 56.9  | 1889 | HP       | no  | Guillot               | FranceLyon    | 4       | Bibliography |
| mme_rose_cheri                 | La Cour de Commer rose garden    | 4  | 62.1  | 1850 | M        | no  | Laffay                | FranceParis   | 4       | Bibliography |
| mme_scipion_cochet             | Val de Marne rose garden         | 8  | 93.8  | 1872 | HP       | no  | Cochet                | FranceParis   | 4       | Bibliography |
| mme_segond_weber               | Val de Marne rose garden         | 8  | 87.2  | 1907 | HT       | no  | Souper & Notting      | EuropeW       | 4       | Bibliography |
| mme_therese_verbnes            | Val de Marne rose garden         | 5  | 86.0  | 1891 | HP       | no  | Lévêque               | FranceParis   | 4       | Bibliography |
| mme_van_houtte                 | Val de Marne rose garden         | 6  | 48.5  | 1857 | HP       | no  | Margottin             | FranceParis   | 4       | Bibliography |
| mme_verlot                     | Val de Marne rose garden         | 5  | 85.1  | 1876 | HP       | no  | Verdier               | FranceParis   | 4       | Bibliography |
| mme_verrier_cachet             | Jumaju rose garden               | 3  | 77.0  | 1895 | HP       | no  | Chédane-Guinoiseau    | FranceAngers  | 4       | Bibliography |
| mme_victor_verdier             | Grande roseraie de Lyon          | 8  | 95.9  | 1859 | HP       | no  | Verdier               | FranceParis   | 4       | Bibliography |
| mme_vve_alexis_pommery         | Jumaju rose garden               | 5  | 63.0  | 1882 | HP       | no  | Lévêque               | FranceParis   | 4       | Bibliography |
| mme_zoetmans                   | Loubert rose garden              | 2  | 81.8  | 1830 | D        | no  | Marest                | FranceParis   | 4       | Measured     |
| mogador                        | Loubert rose garden              | 7  | 33.5  | 1846 | P        | no  | Unknown               | France        | 2       | Measured     |
| moise                          | Loubert rose garden              | 4  | 76.0  | 1828 | HGal     | no  | Parmentier            | EuropeW       | 3       | Measured     |
| monsieur_cordeau               | Loubert rose garden              | 6  | 69.4  | 1892 | B        | no  | Moreau & Robert       | FranceAngers  | 4       | Measured     |
| monsieur_rosier                | Grande roseraie de Lyon          | 9  | 65.7  | 1897 | T        | no  | Nabonnand             | FranceSE      | 2       | Bibliography |
| montalambert                   | Loubert rose garden              | 4  | 60.2  | 1861 | HGal     | no  | Moreau & Robert       | FranceAngers  | 3       | Measured     |
| montigny                       | Val de Marne rose garden         | 2  | 89.3  | 1842 | HGal     | no  | Unknown               | Unknown       | 4       | Bibliography |
| mousseuse blanche nouvelle     | La Cour de Commer rose garden    | 4  | 72.9  | 1807 | M        | no  | Salter                | EuropeN       | 4       | Bibliography |
| mousseux du japon              | La Cour de Commer rose garden    | 2  | 92.6  | 1899 | M        | no  | Unknown               | Unknown       | 4       | Bibliography |
| mr_francisque_rive             | Jumaju rose garden               | 2  | 61.2  | 1883 | HP       | no  | Schwartz              | FranceLyon    | 4       | Bibliography |
| mr_le_capitaine_louis_frere    | Jumaju rose garden               | 6  | 66.6  | 1883 | HP       | no  | Vigneron              | FranceAngers  | 4       | Bibliography |
| mr_pelisson                    | La Cour de Commer rose garden    | 10 | 76.0  | 1849 | M        | no  | Vibert                | FranceAngers  | 4       | Bibliography |
| mrs_coville                    | Jumaju rose garden               | 4  | 60.5  | 1869 | HSpn     | no  | Moreau & Robert       | FranceAngers  | 4       | Bibliography |
| mrs_dudley_cross               | Désert rose garden               | 9  | 59.5  | 1907 | T        | no  | Paul                  | EuropeN       | 2       | Bibliography |
| mrs_reynolds_hole              | Désert rose garden               | 6  | 34.6  | 1901 | T        | no  | Nabonnand             | FranceSE      | 2       | Bibliography |
| multiflore de vaumarcus        | Jumaju rose garden               | 9  | 48.2  | 1875 | N        | no  | Menet                 | Unknown       | 2       | Bibliography |
| n_j_kicunov                    | Jumaju rose garden               | 16 | 100.0 | 1898 | A        | no  | Micurin               | EuropeE       | Unknown | Unknown      |
| nankin                         | Val de Marne rose garden         | 13 | 100.0 | 1815 | HSpn     | no  | Descemet              | FranceParis   | 4       | Bibliography |
| narcisse_de_salvandy           | Loubert rose garden              | 2  | 78.3  | 1843 | HGal     | no  | Parmentier            | EuropeW       | 4       | Measured     |
| narrow_water                   | Loubert rose garden              | 9  | 47.3  | 1883 | N        | no  | Daisy Hill Nursery    | EuropeN       | 2       | Measured     |
| narrow_water                   | Loubert rose garden              | 9  | 49.7  | 1883 | N        | no  | Daisy Hill Nursery    | EuropeN       | 2       | Measured     |
| nastarana                      | Val de Marne rose garden         | 10 | 99.2  | 1880 | N        | no  | Christ                | France        | 2       | Measured     |
| nathalie                       | Loubert rose garden              | 8  | 87.1  | 1835 | N        | no  | Vibert                | FranceParis   | 4       | Measured     |
| neron                          | Val de Marne rose garden         | 2  | 60.4  | 1841 | HGal     | no  | Laffay                | FranceParis   | 4       | Bibliography |
| new_dawn                       | Val de Marne rose garden         | 2  | 86.0  | 1930 | LCI      | no  | Somerset Rose Nursery | America       | 3       | Bibliography |
| niphotos                       | Désert rose garden               | 8  | 72.4  | 1835 | T        | no  | Bougère               | FranceAngers  | 2       | Bibliography |
| noella_nabonnand               | SCRADH                           | 9  | 29.7  | 1900 | T        | no  | Nabonnand             | FranceSE      | 3       | Bibliography |
| noisette_moschata              | Val de Marne rose garden         | 6  | 37.9  | 1873 | N        | no  | Schwartz              | FranceLyon    | 4       | Measured     |
| noisette_moschata              | Val de Marne rose garden         | 6  | 48.0  | 1873 | N        | no  | Schwartz              | FranceLyon    | 4       | Measured     |
| nouveau_intelligible           | La Cour de Commer rose garden    | 2  | 86.0  | 1811 | HGal     | no  | Unknown               | Unknown       | 4       | Bibliography |
| nouveau_vulcan                 | Val de Marne rose garden         | 2  | 92.6  | 1861 | HGal     | no  | Unknown               | France        | 4       | Bibliography |
| nouvelle_pivoine               | Val de Marne rose garden         | 2  | 82.2  | 1817 | HGal     | no  | Unknown               | EuropeW       | 4       | Bibliography |
| nouvelle_transparente          | Loubert rose garden              | 2  | 94.0  | 1817 | HGal     | no  | Mielliez              | FranceNW      | 4       | Measured     |
| oeillet_de_damas               | Loubert rose garden              | 1  | 53.9  | 1835 | D        | no  | Prevost               | FranceNW      | 4       | Measured     |
| oeillet_double                 | Jumaju rose garden               | 2  | 62.3  | 1841 | HGal     | no  | Prevost               | FranceNW      | 4       | Bibliography |
| oeillet_flamand                | Val de Marne rose garden         | 8  | 77.1  | 1845 | HGal     | no  | Vibert                | FranceAngers  | 4       | Bibliography |
| oeillet_panache                | Loubert rose garden              | 2  | 76.5  | 1887 | M        | no  | Verdier               | FranceParis   | 4       | Bibliography |
| oeillet_parfait                | Val de Marne rose garden         | 2  | 61.0  | 1841 | HGal     | no  | Foulard               | FranceAngers  | 4       | Bibliography |
| ohl                            | Val de Marne rose garden         | 2  | 90.6  | 1843 | HGal     | no  | Vibert                | FranceAngers  | 4       | Bibliography |
| old_blush                      | INRA Angers                      | 9  | 73.9  | 1793 | Ch       | no  | Parsons               | China         | 2       | Measured     |
| old_crimson_china              | Jumaju rose garden               | 9  | 53.4  | 1733 | Ch       | no  | Unknown               | China         | 2       | Bibliography |
| olga_marix                     | Jardin botanique de la Tête d'Or | 6  | 67.3  | 1873 | B        | no  | Schwartz              | FranceLyon    | 3       | Measured     |
| olivet                         | Loubert rose garden              | 6  | 62.0  | 1892 | HMult    | no  | Vigneron              | FranceAngers  | 4       | Measured     |
| ombre_panachee                 | La Cour de Commer rose garden    | 15 | 100.0 | 1811 | HGal     | no  | Unknown               | America       | 4       | Bibliography |
| ombree_parfaite                | La Cour de Commer rose garden    | 4  | 50.3  | 1823 | HGal     | no  | Vibert                | FranceParis   | 4       | Bibliography |
| omer_pacha                     | Loubert rose garden              | 8  | 62.8  | 1853 | B        | no  | Pradel                | FranceSW      | 4       | Bibliography |
| orleans_rose                   | Val de Marne rose garden         | 10 | 98.4  | 1909 | Pol      | no  | Levasseur             | FranceOrleans | 2       | Bibliography |
| ornement_de_la_nature          | La Cour de Commer rose garden    | 2  | 95.2  | 1814 | HGal     | no  | Unknown               | EuropeW       | 4       | Bibliography |
| ornement_des_bosquets          | Loubert rose garden              | 9  | 71.0  | 1860 | Hsem     | no  | Jamain                | FranceParis   | Unknown | Unknown      |
| ornement_des_bosquets          | Val de Marne rose garden         | 9  | 82.7  | 1860 | Hsem     | no  | Jamain                | FranceParis   | Unknown | Unknown      |
| oscar_chauvry                  | Val de Marne rose garden         | 10 | 99.6  | 1900 | N        | no  | Chauvry               | FranceSW      | 4       | Measured     |
| oscar_leclerc                  | La Cour de Commer rose garden    | 15 | 100.0 | 1846 | M        | no  | Robert                | FranceAngers  | 4       | Bibliography |
| ovid                           | Val de Marne rose garden         | 6  | 43.4  | 1890 | Hset     | no  | Geschwind             | EuropeW       | 2       | Bibliography |
| paenionrose                    | La Cour de Commer rose garden    | 2  | 50.5  | 1845 | HGal     | no  | Unknown               | Unknown       | 4       | Bibliography |
| panachee_superbe               | Loubert rose garden              | 4  | 53.5  | 1811 | HGal     | no  | Unknown               | EuropeW       | 4       | Measured     |
| papa_gontier_cl                | Désert rose garden               | 9  | 45.5  | 1882 | T        | no  | Hosp                  | America       | 2       | Bibliography |
| papa_meilland                  | Grande roseraie de Lyon          | 8  | 52.6  | 1963 | HT       | no  | Meilland              | FranceSE      | 4       | Bibliography |
| papillon                       | SCRADH                           | 9  | 74.9  | 1878 | T        | no  | Nabonnand             | FranceSE      | 2       | Bibliography |
| paquerette                     | Loubert rose garden              | 10 | 96.4  | 1875 | Pol      | no  | Guillot               | FranceLyon    | 2       | Measured     |
| paquita                        | La Cour de Commer rose garden    | 2  | 71.0  | 1841 | HGal     | no  | Unknown               | Unknown       | 4       | Bibliography |
| park_wilhelmshöhe              | La Cour de Commer rose garden    | 4  | 69.4  | 1987 | HGal     | no  | Kordes                | EuropeW       | 4       | Bibliography |
| parks_yellow_tea_scented_china | Loubert rose garden              | 10 | 98.7  | 1824 | T        | no  | Unknown               | China         | 2       | Measured     |
| parmentier                     | La Cour de Commer rose garden    | 3  | 72.3  | 1860 | HP       | no  | Guillot               | FranceLyon    | 4       | Bibliography |
| paul_nabonnand                 | Loubert rose garden              | 8  | 59.9  | 1878 | T        | no  | Nabonnand             | FranceSE      | 2       | Measured     |
| paul_neyron                    | Grande roseraie de Lyon          | 10 | 30.9  | 1869 | HP       | no  | Levet                 | FranceLyon    | 4       | Bibliography |
| paul_noel                      | Val de Marne rose garden         | 2  | 58.8  | 1913 | HWich    | no  | Tanne                 | FranceNW      | 2       | Bibliography |
| paul_ricault                   | La Cour de Commer rose garden    | 5  | 75.2  | 1845 | C        | no  | Portemer              | FranceParis   | 4       | Bibliography |
| paul_s_early_blush             | Loubert rose garden              | 6  | 67.6  | 1893 | HP       | no  | Paul                  | EuropeN       | 4       | Measured     |
| paul_s_himalayan_musk          | Désert rose garden               | 10 | 99.6  | 1916 | Hmsk     | no  | Paul                  | EuropeN       | Unknown | Unknown      |
| paul_transon                   | Jumaju rose garden               | 10 | 99.4  | 1900 | HWich    | no  | Barbier               | FranceOrleans | 4       | Bibliography |
| paul_verdier                   | Loubert rose garden              | 5  | 72.6  | 1866 | HP       | no  | Verdier               | FranceParis   | 4       | Measured     |
| pauline_bonaparte              | Val de Marne rose garden         | 8  | 97.2  | 1850 | B        | no  | Laffay                | FranceParis   | Unknown | Unknown      |
| pavillon_de_pregny             | Jumaju rose garden               | 6  | 46.5  | 1863 | N        | no  | Guillot               | FranceLyon    | 2       | Bibliography |
| pergolese                      | Loubert rose garden              | 3  | 54.9  | 1840 | P        | no  | Moreau & Robert       | FranceAngers  | 4       | Measured     |
| perle_d_angers                 | Loubert rose garden              | 6  | 72.6  | 1879 | B        | no  | Moreau & Robert       | FranceAngers  | 4       | Measured     |
| perle_des_blanches             | Jumaju rose garden               | 9  | 30.8  | 1872 | N        | no  | Lacharme              | FranceLyon    | Unknown | Unknown      |
| perle_des_jardins              | Désert rose garden               | 9  | 67.3  | 1874 | T        | no  | Levet                 | FranceLyon    | 2       | Bibliography |
| persian_yellow                 | Loubert rose garden              | 13 | 100.0 | 1837 | Sp       | yes | Willock               | Middle East   | 4       | Measured     |
| persian_yellow                 | Loubert rose garden              | 13 | 100.0 | 1837 | Sp       | yes | Willock               | Middle East   | 4       | Measured     |
| persian_yellow                 | Loubert rose garden              | 13 | 100.0 | 1837 | Sp       | yes | Willock               | Middle East   | 4       | Bibliography |
| persian_yellow1                | Loubert rose garden              | 13 | 100.0 | 1837 | Sp       | yes | Willock               | Middle East   | 4       | Measured     |
| petit_louis                    | Val de Marne rose garden         | 11 | 47.8  | 1919 | HWich    | no  | Nonin                 | FranceParis   | 2       | Bibliography |
| petite_de_hollande             | La Cour de Commer rose garden    | 2  | 56.7  | 1791 | C        | no  | Unknown               | EuropeW       | 4       | Bibliography |
| petite_ecossaise               | Loubert rose garden              | 13 | 88.0  | 1826 | HSpn     | no  | Vibert                | FranceParis   | 4       | Measured     |
| petite_leonie                  | Loubert rose garden              | 9  | 45.5  | 1892 | Pol      | no  | Souper & Notting      | EuropeW       | 2       | Measured     |
| petite_lisette                 | Loubert rose garden              | 14 | 100.0 | 1817 | A        | no  | Vibert                | FranceParis   | 4       | Measured     |
| petite_orleanaise              | Val de Marne rose garden         | 3  | 64.8  | 1900 | HGal     | no  | Unknown               | Unknown       | 4       | Bibliography |
| philemon_cochet                | La Beaujoire rose garden         | 8  | 96.4  | 1895 | B        | no  | Cochet                | FranceParis   | 4       | Bibliography |
| philomele                      | Val de Marne rose garden         | 6  | 63.4  | 1844 | N        | no  | Vibert                | FranceAngers  | 4       | Measured     |
| pierre_de_ronsard              | La Beaujoire rose garden         | 8  | 70.8  | 1985 | LCI      | no  | Meilland              | FranceSE      | Unknown | Unknown      |
| pierre_de_saint_cyr            | Val de Marne rose garden         | 9  | 37.9  | 1838 | B        | no  | Plantier              | FranceLyon    | 4       | Bibliography |
| pink_pearl_cl                  | Val de Marne rose garden         | 7  | 38.7  | 1913 | HT       | no  | Hobbies               | EuropeN       | 4       | Bibliography |
| pink_roamer                    | Val de Marne rose garden         | 9  | 36.1  | 1890 | HWich    | no  | Horvath               | America       | 2       | Bibliography |
| pink_rover                     | Val de Marne rose garden         | 8  | 87.8  | 1891 | HT       | no  | Paul                  | EuropeN       | 4       | Bibliography |
| pompon_blanc_parfait           | Loubert rose garden              | 6  | 45.5  | 1876 | A        | no  | Verdier               | FranceParis   | 4       | Measured     |
| pompon_de_bourgogne            | Jumaju rose garden               | 2  | 73.9  | 1664 | HGal     | no  | Unknown               | France        | 4       | Bibliography |
| pompon_de_paris                | Loubert rose garden              | 9  | 70.8  | 1800 | Ch       | no  | Colville              | Unknown       | 2       | Measured     |
| pompon_de_paris_cl             | Jardin botanique de la Tête d'Or | 9  | 68.0  | 1839 | Ch       | no  | Unknown               | Unknown       | Unknown | Unknown      |
| pompon_panache                 | Loubert rose garden              | 2  | 91.6  | 1858 | HGal     | no  | Moreau & Robert       | FranceAngers  | 4       | Measured     |
| ponctuee                       | Val de Marne rose garden         | 4  | 63.4  | 1829 | M        | no  | Herbert               | France        | 4       | Bibliography |
| poppeis                        | Loubert rose garden              | 13 | 98.8  | 1838 | HSpn     | no  | Stenberg              | Unknown       | 3       | Measured     |
| pourpre                        | Jumaju rose garden               | 7  | 43.7  | 1823 | Ch       | no  | Vibert                | FranceParis   | Unknown | Unknown      |
| pourpre_ancien                 | Loubert rose garden              | 12 | 99.7  | 1820 | Misc_OGR | no  | Unknown               | Unknown       | 2       | Bibliography |

|                                   |                                  |    |       |         |      |          |     |                   |               |         |              |
|-----------------------------------|----------------------------------|----|-------|---------|------|----------|-----|-------------------|---------------|---------|--------------|
| pourpre_charmant                  | La Cour de Commer rose garden    | 2  | 89.4  |         | 1811 | HGal     | no  | Unknown           | America       | 4       | Bibliography |
| president_dutaill                 | Val de Marne rose garden         | 2  | 91.1  |         | 1888 | HGal     | no  | Dubreuil          | FranceLyon    | 4       | Bibliography |
| president_gausen                  | Val de Marne rose garden         | 8  | 96.3  |         | 1862 | B        | no  | Pradel            | FranceSW      | 4       | Bibliography |
| prince_albert                     | Val de Marne rose garden         | 8  | 77.0  |         | 1852 | B        | no  | Fontaine          | FranceParis   | 4       | Bibliography |
| prince_camille_de_rohan           | Loubert rose garden              | 8  | 66.2  |         | 1861 | HP       | no  | Verdier           | FranceParis   | 4       | Measured     |
| prince_charles                    | Loubert rose garden              | 4  | 68.2  |         | 1842 | B        | no  | Hardy             | FranceParis   | Unknown | Unknown      |
| prince_ches_d_arenberg            | Jumaju rose garden               | 3  | 55.8  |         | 1887 | HP       | no  | Soupert & Notting | EuropeW       | 4       | Bibliography |
| prince_eugene_de_beahuarnais      | Jumaju rose garden               | 2  | 87.3  |         | 1864 | HP       | no  | Pernet            | FranceLyon    | Unknown | Unknown      |
| prince_frederic                   | La Cour de Commer rose garden    | 3  | 49.0  |         | 1840 | HGal     | no  | Parmentier        | EuropeW       | 4       | Bibliography |
| prince_noir                       | Loubert rose garden              | 8  | 55.5  |         | 1854 | HP       | no  | Boyau             | FranceAngers  | 4       | Measured     |
| princess_of_wales                 | Jumaju rose garden               | 5  | 87.0  |         | 1871 | HP       | no  | Laxton            | EuropeN       | 4       | Bibliography |
| princesse_amelie                  | La Cour de Commer rose garden    | 15 | 100.0 |         | 1872 | M        | no  | Robert            | FranceAngers  | 4       | Bibliography |
| princesse_de_lamballe             | Loubert rose garden              | 16 | 100.0 |         | 1830 | A        | no  | Miellez           | FranceNW      | 6       | Measured     |
| princesse_de_nassau               | Val de Marne rose garden         | 2  | 77.9  |         | 1829 | N        | no  | Laffay            | FranceParis   | Unknown | Unknown      |
| princesse_de_sagan                | Loubert rose garden              | 9  | 64.8  |         | 1887 | Ch       | no  | Dubreuil          | FranceLyon    | 2       | Measured     |
| princesse_josephine_de_flandre    | Val de Marne rose garden         | 9  | 45.0  |         | 1888 | Pol      | no  | Soupert           | EuropeW       | 2       | Bibliography |
| princesse_louise                  | Loubert rose garden              | 10 | 89.8  |         | 1828 | HSem     | no  | Jacques           | FranceParis   | 2       | Measured     |
| princesse_marie                   | Loubert rose garden              | 10 | 88.5  |         | 1821 | HSem     | no  | Jacques           | FranceParis   | 2       | Bibliography |
| princesse_radziwill               | Val de Marne rose garden         | 8  | 52.6  |         | 1886 | HP       | no  | Lévêque           | FranceParis   | 4       | Bibliography |
| princesse_royale                  | La Cour de Commer rose garden    | 9  | 59.1  |         | 1846 | M        | no  | Portemer          | FranceParis   | 4       | Bibliography |
| professeur_ganviat                | Loubert rose garden              | 9  | 69.6  |         | 1890 | T        | no  | Perrier           | FranceLyon    | 2       | Measured     |
| provence_pink                     | Loubert rose garden              | 2  | 73.5  |         | 1450 | C        | no  | Unknown           | EuropeW       | 4       | Measured     |
| provins_ancien                    | Val de Marne rose garden         | 15 | 100.0 |         | 1853 | HGal     | no  | Cochet            | FranceParis   | 4       | Bibliography |
| provins_renoncule                 | Loubert rose garden              | 2  | 87.3  |         | 1810 | HGal     | no  | Dupont            | FranceParis   | 4       | Measured     |
| pucelle_de_lille                  | Loubert rose garden              | 2  | 92.6  |         | 1828 | HGal     | no  | Miellez           | FranceNW      | 4       | Measured     |
| pucelle_de_lille1                 | Loubert rose garden              | 2  | 95.0  |         | 1828 | HGal     | no  | Miellez           | FranceNW      | 4       | Measured     |
| purezza                           | Désert rose garden               | 10 | 97.2  |         | 1961 | ICI      | no  | Mansuino          | EuropeS       | Unknown | Unknown      |
| purpurea_rubra                    | La Cour de Commer rose garden    | 3  | 68.8  |         | 1849 | M        | no  | Unknown           | Unknown       | 4       | Bibliography |
| quatre_saisons_blanc_mousseux     | Loubert rose garden              | 3  | 61.6  |         | 1830 | M        | no  | Laffay            | FranceParis   | 4       | Measured     |
| quatre_saisons_blanc_mousseux     | Loubert rose garden              | 3  | 70.1  |         | 1830 | M        | no  | Laffay            | FranceParis   | 4       | Measured     |
| quatre_saisons_continues          | Loubert rose garden              | 4  | 65.3  |         | 1633 | D        | no  | Unknown           | France        | 4       | Measured     |
| queen_des_prairies                | Jardin botanique de la Tête d'Or | 9  | 51.7  |         | 1843 | HSet     | no  | Feast             | America       | 3       | Bibliography |
| queen_elizabeth                   | Jardin botanique de la Tête d'Or | 15 | 100.0 |         | 1954 | Gr       | no  | Lammerts          | America       | 4       | Bibliography |
| queen_mab                         | Jumaju rose garden               | 9  | 63.8  |         | 1896 | Ch       | no  | Paul              | EuropeN       | Unknown | Unknown      |
| red_damask                        | Loubert rose garden              | 2  | 88.9  |         | 1160 | Sp       | no  | Unknown           | Europe        | 4       | Bibliography |
| red_intuition                     | INRA Angers                      | 10 | 98.0  |         | 1999 | HT       | no  | Delbard           | FranceParis   | 4       | Bibliography |
| reine_d_espagne                   | Val de Marne rose garden         | 2  | 84.6  |         | 1861 | HP       | no  | Fontaine          | FranceParis   | 4       | Bibliography |
| reine_de_belgique                 | Loubert rose garden              | 10 | 70.9  |         | 1845 | Unknown  | no  | Unknown           | Unknown       | Unknown | Unknown      |
| reine_des_belges                  | Jardin botanique de la Tête d'Or | 10 | 69.9  |         | 1832 | Ayr      | no  | Jacques           | FranceParis   | 2       | Bibliography |
| reine_des_centfeuillees           | Loubert rose garden              | 2  | 68.3  |         | 1824 | C        | no  | Unknown           | EuropeW       | 4       | Measured     |
| reine_des_mousseuses              | La Cour de Commer rose garden    | 2  | 60.4  |         | 1860 | M        | no  | Moreau & Robert   | FranceAngers  | 4       | Bibliography |
| reine_des_violettes               | Loubert rose garden              | 5  | 88.7  |         | 1860 | HP       | no  | Millet-Mallet     | FranceNW      | 4       | Bibliography |
| rene_andre                        | Loubert rose garden              | 9  | 46.8  |         | 1901 | HWich    | no  | Barbier           | FranceOrleans | 2       | Measured     |
| renoncule                         | Val de Marne rose garden         | 10 | 89.7  |         | 1913 | Pol      | no  | Barbier           | FranceOrleans | 2       | Bibliography |
| repens                            | Val de Marne rose garden         | 9  | 57.1  |         | 1829 | N        | no  | Garcon            | FranceNW      | 4       | Measured     |
| reve_d_or                         | Jardin botanique de la Tête d'Or | 9  | 77.0  |         | 1860 | N        | no  | Ducher            | FranceLyon    | 2       | Measured     |
| river_s_george_iv                 | Loubert rose garden              | 8  | 97.5  |         | 1820 | HCh      | no  | Rivers            | EuropeN       | 4       | Measured     |
| robert_le_diable                  | Loubert rose garden              | 2  | 85.1  |         | 1837 | HGal     | no  | Unknown           | Unknown       | 4       | Measured     |
| robusta                           | Val de Marne rose garden         | 9  | 34.0  |         | 1877 | B        | no  | Soupert           | EuropeW       | 4       | Bibliography |
| robusta_bourbon                   | Loubert rose garden              | 7  | 36.7  |         | 1877 | B        | no  | Soupert & Notting | EuropeW       | 4       | Measured     |
| rodhatte                          | Val de Marne rose garden         | 8  | 40.8  |         | 1912 | F        | no  | Poulsen           | EuropeN       | 3       | Bibliography |
| roger_lambelin                    | Grande roseraie de Lyon          | 6  | 46.4  |         | 1890 | HP       | no  | Schwartz          | FranceLyon    | 4       | Bibliography |
| roi_de_siam                       | Loubert rose garden              | 6  | 37.7  |         | 1825 | T        | no  | Laffay            | FranceParis   | 3       | Measured     |
| roi_des_aunes                     | Loubert rose garden              | 10 | 65.5  |         | 1884 | S        | no  | Geschwind         | EuropeW       | 2       | Measured     |
| roi_des_pays_bas                  | Jumaju rose garden               | 3  | 60.8  |         | 1824 | D        | no  | Unknown           | EuropeW       | 4       | Bibliography |
| roi_des_pourpres                  | Loubert rose garden              | 4  | 66.9  |         | 1819 | HGal     | no  | Descemet          | FranceParis   | 4       | Measured     |
| rosa_acicularis                   | Jardin botanique de la Tête d'Or | 12 | 100.0 | Unknown |      | Sp       | yes | Unknown           | America       | 6       | Bibliography |
| rosa_agrestis                     | Loubert rose garden              | 14 | 98.2  |         | 1878 | Sp       | yes | Unknown           | Europe        | 5       | Unknown      |
| rosa_alba                         | Val de Marne rose garden         | 16 | 100.0 |         | 1597 | Sp       | no  | Unknown           | Europe        | 6       | Bibliography |
| rosa_alba_maxima                  | Loubert rose garden              | 16 | 100.0 |         | 1500 | A        | no  | Unknown           | Europe        | 6       | Bibliography |
| rosa_alba_semi_plena              | Loubert rose garden              | 16 | 100.0 |         | 1629 | A        | no  | Unknown           | Europe        | 6       | Bibliography |
| rosa_albertii                     | Loubert rose garden              | 12 | 100.0 |         | 1877 | Sp       | yes | Regel             | Asia          | 4       | Measured     |
| rosa_amblyotis                    | Jardin botanique de la Tête d'Or | 12 | 99.0  |         | 1847 | Sp       | yes | Unknown           | Asia          | 2       | Bibliography |
| rosa_andrae                       | Loubert rose garden              | 12 | 100.0 |         | 1875 | Sp       | no  | Lange             | Asia          | 4       | Measured     |
| rosa_anemoneaeflora               | Loubert rose garden              | 12 | 99.7  |         | 1844 | Sp       | no  | Fortune           | China         | 4       | Measured     |
| rosa_anemonea                     | Loubert rose garden              | 12 | 99.8  |         | 1814 | Sp       | no  | Unknown           | Unknown       | 4       | Bibliography |
| rosa_arkansana                    | Loubert rose garden              | 16 | 97.9  |         | 1715 | Sp       | yes | Unknown           | America       | 5       | Measured     |
| rosa_arkansana_corsley_form       | Loubert rose garden              | 14 | 75.9  |         | 1880 | Sp       | yes | Unknown           | America       | 6       | Measured     |
| rosa_arvensis                     | Loubert rose garden              | 10 | 96.6  |         | 1750 | Sp       | yes | Unknown           | Europe        | 2       | Measured     |
| rosa_atropurpurea                 | Loubert rose garden              | 12 | 100.0 |         | 1790 | HGal     | no  | Unknown           | EuropeW       | Unknown | Unknown      |
| rosa_aveyronensis                 | Loubert rose garden              | 14 | 100.0 |         | 1900 | intersp  | no  | Unknown           | France        | 6       | Measured     |
| rosa_banksiae_alba_plena          | Private donations                | 10 | 99.3  |         | 1807 | Sp       | yes | Unknown           | China         | 2       | Bibliography |
| rosa_banksiae_normalis            | Désert rose garden               | 12 | 94.9  |         | 1796 | Sp       | yes | Unknown           | China         | 2       | Bibliography |
| rosa_banksiopsis                  | Loubert rose garden              | 12 | 99.9  |         | 1907 | Sp       | yes | Baker             | China         | 2       | Bibliography |
| rosa_beggeriana_nigr              | Loubert rose garden              | 12 | 99.9  |         | 1860 | Sp       | yes | Unknown           | Asia          | 3       | Measured     |
| rosa_bracteata                    | Loubert rose garden              | 12 | 68.0  |         | 1793 | Sp       | yes | Macartney         | China         | 2       | Measured     |
| rosa_brunonii                     | Jardin botanique de la Tête d'Or | 10 | 77.9  | Unknown |      | Sp       | yes | Unknown           | Asia          | 2       | Bibliography |
| rosa_californica                  | Loubert rose garden              | 10 | 91.3  |         | 1878 | Sp       | yes | Unknown           | America       | 2       | Measured     |
| rosa_californica1                 | Loubert rose garden              | 10 | 92.8  |         | 1878 | Sp       | yes | Unknown           | America       | 2       | Measured     |
| rosa_calocarpa                    | Loubert rose garden              | 12 | 99.5  |         | 1891 | HRg      | no  | Bruant            | FranceAngers  | 2       | Measured     |
| rosa_canina_blondeana             | Loubert rose garden              | 15 | 100.0 |         | 1861 | Sp       | yes | Unknown           | Europe        | 6       | Measured     |
| rosa_cannabifolia                 | Loubert rose garden              | 16 | 100.0 |         | 1800 | A        | no  | Flobert           | France        | 6       | Bibliography |
| rosa_carolina_grandiflora_humilis | La Beaujoire rose garden         | 12 | 99.9  |         | 1826 | Sp       | yes | Unknown           | America       | 4       | Bibliography |
| rosa_caudata                      | Loubert rose garden              | 12 | 100.0 |         | 1896 | Sp       | yes | Unknown           | China         | 2       | Bibliography |
| rosa_centifolia_bullata           | Jumaju rose garden               | 1  | 51.6  |         | 1801 | C        | no  | Duhamel           | EuropeW       | 4       | Bibliography |
| rosa_centifolia_muscosa           | La Cour de Commer rose garden    | 2  | 88.6  |         | 1696 | M        | no  | Unknown           | EuropeW       | 4       | Bibliography |
| rosa_centifolia_parvifolia        | Val de Marne rose garden         | 6  | 48.4  |         | 1664 | HGal     | no  | Unknown           | France        | 4       | Bibliography |
| rosa_centifolia_rosea             | Loubert rose garden              | 4  | 50.1  |         | 1863 | HP       | no  | Touvais           | FranceParis   | 4       | Measured     |
| rosa_centifolia_simplex           | La Cour de Commer rose garden    | 2  | 88.8  |         | 1817 | C        | no  | Dupont            | FranceParis   | 4       | Bibliography |
| rosa_centifolia_white_moss        | Loubert rose garden              | 2  | 67.7  |         | 1788 | M        | no  | Shaller           | EuropeN       | 4       | Bibliography |
| rosa_chinensis                    | Loubert rose garden              | 10 | 99.4  |         | 1759 | Sp       | yes | Unknown           | China         | 2       | Bibliography |
| rosa_chinensis_jacq_var_chinensis | Flower Research Institute, China | 10 | 84.0  |         | 1759 | Sp       | yes | Unknown           | China         | 2       | Measured     |
| rosa_chinensis_mutabilis          | Jardin botanique de la Tête d'Or | 10 | 35.0  |         | 1894 | Ch       | no  | Unknown           | Africa        | 2       | Bibliography |
| rosa_chinensis_old_blush          | Loubert rose garden              | 9  | 73.9  |         | 1796 | Ch       | no  | Unknown           | China         | 2       | Measured     |
| rosa_chinensis_old_blush_cl       | Jardin botanique de la Tête d'Or | 9  | 70.8  |         | 1752 | Ch       | no  | Unknown           | China         | 2       | Bibliography |
| rosa_chinensis_viridiflora        | Loubert rose garden              | 9  | 64.4  |         | 1856 | Ch       | yes | Smith             | America       | 2       | Bibliography |
| rosa_clinophylla                  | INRA Angers                      | 8  | 97.0  |         | 1820 | Sp       | yes | Whitley           | Asia          | 2       | Bibliography |
| rosa_complicata                   | Loubert rose garden              | 6  | 46.1  |         | 1864 | HGal     | no  | Unknown           | Unknown       | 4       | Bibliography |
| rosa_coryana                      | Loubert rose garden              | 12 | 100.0 |         | 1732 | S        | no  | Hurst             | EuropeN       | Unknown | Unknown      |
| rosa_cuspidata                    | Loubert rose garden              | 15 | 99.4  |         | 1820 | Sp       | yes | Unknown           | EuropeE       | 4       | Measured     |
| rosa_cymosa                       | Jardin botanique de la Tête d'Or | 10 | 99.6  |         | 1904 | Sp       | yes | Unknown           | Asia          | 2       | Bibliography |
| rosa_dafugui                      | Flower Research Institute, China | 5  | 91.2  | Unknown |      | Unknown  | no  | Unknown           | Unknown       | 4       | Measured     |
| rosa_damascena                    | Val de Marne rose garden         | 4  | 50.8  |         | 1560 | D        | no  | Unknown           | Middle_East   | 4       | Bibliography |
| rosa_damascena_celsiana           | La Beaujoire rose garden         | 2  | 92.4  |         | 1732 | D        | no  | Cels_de_Holl      | EuropeW       | 4       | Bibliography |
| rosa_dumalis                      | Loubert rose garden              | 15 | 100.0 |         | 1872 | Sp       | yes | Unknown           | EuropeE       | 5       | Measured     |
| rosa_dumetorum                    | Loubert rose garden              | 15 | 100.0 |         | 1889 | Sp       | yes | Schmidt           | EuropeE       | 5       | Measured     |
| rosa_dupontii                     | Loubert rose garden              | 4  | 71.6  |         | 1817 | Misc_OGR | no  | Dupont            | FranceParis   | 4       | Measured     |
| rosa_ecae                         | Loubert rose garden              | 12 | 51.5  |         | 1880 | Sp       | yes | Unknown           | Middle_East   | 2       | Bibliography |
| rosa_elegantula                   | Jardin botanique de la Tête d'Or | 12 | 98.8  |         | 1908 | Sp       | yes | Wilson            | China         | 2       | Bibliography |
| rosa_excelsa                      | Val de Marne rose garden         | 11 | 40.1  |         | 1909 | HWich    | no  | Walsh             | America       | 2       | Bibliography |
| rosa_farreri_persetosa            | Val de Marne rose garden         | 12 | 99.7  |         | 1895 | Sp       | yes | Wilson            | China         | 2       | Bibliography |
| rosa_fedschenkoana                | Loubert rose garden              | 12 | 99.8  |         | 1871 | Sp       | yes | Fedtschenko       | Asia          | 4       | Measured     |
| rosa_ferruginea                   | Loubert rose garden              | 12 | 99.9  |         | 1814 | Sp       | yes | Unknown           | Europe        | 2       | Measured     |
| rosa_filipes                      | Jardin botanique de la Tête d'Or | 12 | 59.4  |         | 1908 | Sp       | yes | Wilson            | China         | 2       | Bibliography |
| rosa_filipes                      | Loubert rose garden              | 10 | 95.4  |         | 1908 | Sp       | yes | Wilson            | China         | 2       | Bibliography |
| rosa_foetida                      | Loubert rose garden              | 13 | 100.0 |         | 1597 | Sp       | yes | Unknown           | Asia          | 4       | Bibliography |
| rosa_foetida_bicolor              | Loubert rose garden              | 13 | 100.0 |         | 1590 | Sp       | yes | Unknown           | Middle_East   | 4       | Bibliography |
| rosa_fortiniana_de_banks          | Private donations                | 12 | 98.2  |         | 1840 | Unknown  | no  | Fortune           | China         | 2       | Bibliography |
| rosa_froebeli                     | Loubert rose garden              | 15 | 100.0 |         | 1889 | Sp       | yes | Unknown           | EuropeE       | 5       | Measured     |

|                                        |                                  |    |       |         |      |          |     |                             |             |         |              |
|----------------------------------------|----------------------------------|----|-------|---------|------|----------|-----|-----------------------------|-------------|---------|--------------|
| rosa_gallica                           | Jardin botanique de la Tête d'Or | 2  | 72.8  |         | 1500 | Sp       | yes | Unknown                     | EuropeE     | 4       | Bibliography |
| rosa_gallica                           | Loubert rose garden              | 2  | 62.4  |         | 1500 | Sp       | yes | Unknown                     | EuropeE     | 4       | Measured     |
| rosa_gallica_officinalis               | Loubert rose garden              | 2  | 57.0  |         | 1160 | Sp       | yes | Unknown                     | EuropeE     | 4       | Bibliography |
| rosa_gallica_pumila                    | Loubert rose garden              | 3  | 71.3  |         | 1774 | HGal     | yes | Unknown                     | EuropeS     | 4       | Bibliography |
| rosa_gallica_tricolore                 | Val de Marne rose garden         | 2  | 90.1  |         | 1815 | HGal     | no  | Stegerhoek                  | EuropeW     | 4       | Bibliography |
| rosa_gallica_velutinaeflora            | La Cour de Commer rose garden    | 6  | 49.9  |         | 1583 | Sp       | yes | Regel                       | France      | 4       | Bibliography |
| rosa_gallica_versicolor                | Loubert rose garden              | 1  | 69.2  |         | 1581 | Sp       | yes | Unknown                     | EuropeE     | 4       | Bibliography |
| rosa_gentiliana                        | Loubert rose garden              | 10 | 97.1  |         | 1888 | Sp       | no  | Unknown                     | China       | 2       | Bibliography |
| rosa_gigantea                          | Val de Marne rose garden         | 9  | 52.0  |         | 1889 | Sp       | yes | George_Watt/Henry_Collett   | Asia        | 2       | Bibliography |
| rosa_gigantea_x_banksiae_joanna_millar | Désert rose garden               | 10 | 98.6  |         | 2008 | Unknown  | no  | Millar                      | France      | Unknown | Unknown      |
| rosa_giraldi                           | Loubert rose garden              | 12 | 99.2  |         | 1897 | Sp       | yes | Crepin                      | China       | 2       | Measured     |
| rosa_glomerata                         | Loubert rose garden              | 12 | 71.9  |         | 1908 | Sp       | yes | Unknown                     | China       | 2       | Bibliography |
| rosa_glutinosa                         | Loubert rose garden              | 12 | 100.0 |         | 1821 | Sp       | yes | Unknown                     | Middle_East | Unknown | Unknown      |
| rosa_haberiana                         | Loubert rose garden              | 15 | 100.0 |         | 1864 | Sp       | yes | Unknown                     | EuropeS     | 5       | Measured     |
| rosa_helenae                           | Private donations                | 16 | 100.0 |         | 1900 | Sp       | yes | Unknown                     | Asia        | 2       | Bibliography |
| rosa_hemisphaerica                     | Arboretum des Barres             | 15 | 99.9  |         | 1516 | Sp       | yes | Unknown                     | Middle_East | 4       | Bibliography |
| rosa_henryi                            | Jardin botanique de la Tête d'Or | 10 | 99.4  |         | 1907 | Sp       | yes | Wilson                      | China       | 2       | Bibliography |
| rosa_heterophylla                      | Loubert rose garden              | 3  | 57.8  |         | 1818 | Sp       | yes | Unknown                     | EuropeW     | 4       | Measured     |
| rosa_hibernica                         | Loubert rose garden              | 15 | 99.9  |         | 1802 | HSpn     | no  | Templeton                   | EuropeN     | 6       | Bibliography |
| rosa_holkensis                         | Loubert rose garden              | 12 | 98.5  |         | 1884 | HSpn     | no  | Unknown                     | EuropeW     | 4       | Bibliography |
| rosa_horrida                           | Loubert rose garden              | 14 | 100.0 |         | 1796 | Sp       | yes | Unknown                     | EuropeE     | 5       | Measured     |
| rosa_huzhongyue                        | Flower Research Institute, China | 9  | 42.0  | Unknown |      | intersp  | no  | Unknown                     | China       | 3       | Measured     |
| rosa_hypathae                          | Loubert rose garden              | 2  | 75.4  |         | 1846 | Unknown  | no  | Roseraie_de_l'Hay-Les-Roses | FranceParis | Unknown | Unknown      |
| rosa_iwara                             | Loubert rose garden              | 12 | 99.1  |         | 1831 | HMult    | no  | Unknown                     | Asia        | 2       | Measured     |
| rosa_iwara1                            | Loubert rose garden              | 12 | 99.1  |         | 1831 | HMult    | no  | Unknown                     | Asia        | 2       | Measured     |
| rosa_jelina                            | Loubert rose garden              | 12 | 100.0 |         | 1894 | HRg      | no  | Kaufmann                    | EuropeW     | 2       | Bibliography |
| rosa_jinfeilian                        | Flower Research Institute, China | 8  | 52.7  |         | 1855 | intersp  | no  | Unknown                     | China       | 4       | Measured     |
| rosa_jinou_fanlu                       | Private donations                | 9  | 48.0  | Unknown |      | T        | no  | Maebara                     | China       | 3       | Measured     |
| rosa_juhongchao                        | Flower Research Institute, China | 8  | 45.0  | Unknown |      | intersp  | no  | Unknown                     | China       | 4       | Measured     |
| rosa_junang                            | Flower Research Institute, China | 9  | 35.8  | Unknown |      | intersp  | no  | Maebara                     | China       | 4       | Measured     |
| rosa_jundzilli                         | Loubert rose garden              | 15 | 100.0 |         | 1870 | Sp       | yes | Unknown                     | EuropeE     | 6       | Bibliography |
| rosa_laevigata                         | Loubert rose garden              | 10 | 99.2  | Unknown |      | Sp       | yes | Unknown                     | Asia        | 2       | Bibliography |
| rosa_leucantha                         | Loubert rose garden              | 15 | 94.2  |         | 1557 | Sp       | yes | Unknown                     | Europe      | 5       | Bibliography |
| rosa_longicuspis                       | Loubert rose garden              | 10 | 83.7  |         | 1915 | Sp       | yes | Unknown                     | Asia        | 2       | Bibliography |
| rosa_luciae                            | Jardin botanique de la Tête d'Or | 10 | 71.3  | Unknown |      | Sp       | yes | Unknown                     | Asia        | 2       | Bibliography |
| rosa_lucidissima                       | Flower Research Institute, China | 10 | 98.9  | Unknown |      | Sp       | yes | Unknown                     | China       | Unknown | Unknown      |
| rosa_macrophylla                       | Loubert rose garden              | 12 | 99.9  |         | 1818 | Sp       | yes | Unknown                     | Asia        | 4       | Bibliography |
| rosa_macrophylla_glaucophylla          | Loubert rose garden              | 12 | 99.7  |         | 1895 | Sp       | yes | Unknown                     | China       | 4       | Bibliography |
| rosa_majalis_plena                     | Loubert rose garden              | 12 | 99.1  |         | 1583 | Misc_OGR | yes | Unknown                     | EuropeN     | 2       | Bibliography |
| rosa_manettii                          | Loubert rose garden              | 6  | 48.2  |         | 1835 | N        | no  | Manetti                     | EuropeS     | Unknown | Unknown      |
| rosa_marginata                         | Loubert rose garden              | 15 | 100.0 |         | 1870 | Sp       | yes | Unknown                     | EuropeE     | 6       | Bibliography |
| rosa_maximowicziana                    | Loubert rose garden              | 10 | 99.5  |         | 1880 | Sp       | yes | Unknown                     | Asia        | 2       | Measured     |
| rosa_melina                            | Loubert rose garden              | 12 | 100.0 |         | 1896 | Sp       | yes | Greene                      | America     | 6       | Bibliography |
| rosa_minutifolia_alba                  | Loubert rose garden              | 12 | 100.0 |         | 1882 | Sp       | yes | Parry                       | America     | 2       | Bibliography |
| rosa_moschata_floribunda               | Loubert rose garden              | 12 | 100.0 |         | 1907 | HMSk     | yes | Unknown                     | Middle_East | 2       | Bibliography |
| rosa_moyesii                           | Jardin botanique de la Tête d'Or | 12 | 99.6  |         | 1894 | Sp       | yes | Wilson                      | China       | Unknown | Unknown      |
| rosa_mudan_yue_ji                      | Flower Research Institute, China | 8  | 62.9  | Unknown |      | intersp  | no  | Unknown                     | China       | 4       | Measured     |
| rosa_multibracteata                    | Jardin botanique de la Tête d'Or | 12 | 100.0 |         | 1908 | Sp       | yes | Wilson                      | China       | 4       | Bibliography |
| rosa_multiflora                        | Private donations                | 2  | 84.0  | Unknown |      | Sp       | yes | Unknown                     | Asia        | 2       | Bibliography |
| rosa_multiflora_carnea                 | Loubert rose garden              | 10 | 99.5  |         | 1804 | Sp       | yes | Unknown                     | China       | 2       | Measured     |
| rosa_multiflora_nana                   | Val de Marne rose garden         | 10 | 79.1  |         | 1875 | Pol      | yes | Unknown                     | Asia        | 2       | Bibliography |
| rosa_multiflora_platyphylla            | Val de Marne rose garden         | 4  | 63.1  |         | 1817 | HMult    | yes | Unknown                     | Asia        | 2       | Bibliography |
| rosa_multiflora1                       | Val de Marne rose garden         | 2  | 93.1  |         | 1960 | Sp       | yes | Unknown                     | Asia        | 2       | Bibliography |
| rosa_odorata                           | Jumaju rose garden               | 9  | 60.5  |         | 1808 | T        | no  | Unknown                     | Asia        | 2       | Bibliography |
| rosa_odorata_spontanea                 | Désert rose garden               | 10 | 89.1  | Unknown |      | intersp  | no  | Unknown                     | Asia        | Unknown | Unknown      |
| rosa_odorata_sweet_var_erubescens      | Flower Research Institute, China | 10 | 94.3  | Unknown |      | Misc_OGR | yes | Unknown                     | Asia        | Unknown | Unknown      |
| rosa_odorata_sweet_var_gigantea        | Flower Research Institute, China | 10 | 99.4  |         | 1889 | Sp       | yes | George_Watt/Henry_Collett   | Asia        | 2       | Measured     |
| rosa_odorata_sweet_var_odorata         | Flower Research Institute, China | 10 | 95.3  |         | 1808 | intersp  | no  | Unknown                     | China       | 2       | Measured     |
| rosa_odorata_sweet_var_pseudoincisa    | Flower Research Institute, China | 10 | 70.6  | Unknown |      | intersp  | no  | Fortune                     | China       | 2       | Measured     |
| rosa_oleifolia                         | Loubert rose garden              | 10 | 99.4  |         | 1900 | HGal     | no  | Dyck                        | Unknown     | 4       | Bibliography |
| rosa_omeiensis_chrysocharpa            | Loubert rose garden              | 12 | 58.0  |         | 1890 | Sp       | yes | Unknown                     | China       | Unknown | Unknown      |
| rosa_paeonia                           | Loubert rose garden              | 4  | 60.1  |         | 1855 | HP       | no  | Lacharme                    | FranceLyon  | 4       | Bibliography |
| rosa_palustris                         | Jardin botanique de la Tête d'Or | 12 | 98.3  |         | 1726 | Sp       | yes | Unknown                     | America     | Unknown | Unknown      |
| rosa_pendulina_amadis                  | Loubert rose garden              | 10 | 98.4  |         | 1829 | Unknown  | no  | Laffay                      | FranceParis | 4       | Bibliography |
| rosa_pendulina_gracilis                | Loubert rose garden              | 10 | 97.7  |         | 1830 | Sp       | yes | Wood                        | Unknown     | 3       | Measured     |
| rosa_pendulina_pyrenaica               | Loubert rose garden              | 12 | 100.0 |         | 1815 | Sp       | yes | Unknown                     | EuropeS     | 4       | Measured     |
| rosa_phoenicea                         | Loubert rose garden              | 10 | 94.6  |         | 1885 | Sp       | yes | Unknown                     | Middle_East | 2       | Measured     |
| rosa_pimpinellifolia_chlorocarpa       | Val de Marne rose garden         | 12 | 97.4  |         | 1904 | HSpn     | no  | Lévêque_de_Vilmorin         | France      | 4       | Bibliography |
| rosa_pimpinellifolia_double_white      | Loubert rose garden              | 13 | 99.8  |         | 1815 | HSpn     | no  | Unknown                     | EuropeN     | 4       | Bibliography |
| rosa_polliniana                        | Loubert rose garden              | 3  | 67.1  |         | 1800 | Misc_OGR | no  | Unknown                     | EuropeS     | 4       | Bibliography |
| rosa_polmeriana                        | Loubert rose garden              | 15 | 100.0 |         | 1904 | Unknown  | no  | Pollmer                     | EuropeW     | 5       | Bibliography |
| rosa_pomifera                          | Loubert rose garden              | 15 | 99.9  |         | 1770 | Sp       | yes | Unknown                     | EuropeE     | Unknown | Unknown      |
| rosa_primula                           | Jardin botanique de la Tête d'Or | 13 | 50.9  |         | 1890 | Sp       | yes | Meyer                       | Asia        | 2       | Bibliography |
| rosa_primulii_rosea                    | Loubert rose garden              | 12 | 84.5  |         | 1912 | Unknown  | no  | Unknown                     | Unknown     | 2       | Bibliography |
| rosa_prolifera                         | Val de Marne rose garden         | 3  | 78.2  |         | 1817 | C        | no  | Unknown                     | Unknown     | 4       | Bibliography |
| rosa_pruhoniciana                      | Loubert rose garden              | 14 | 100.0 |         | 1927 | HMoy     | no  | Zeman                       | EuropeE     | Unknown | Unknown      |
| rosa_pteragonis                        | Loubert rose garden              | 14 | 100.0 |         | 1922 | S        | no  | Hurst                       | EuropeN     | 2       | Bibliography |
| rosa_pufuhong                          | Flower Research Institute, China | 9  | 47.2  | Unknown |      | intersp  | no  | Unknown                     | China       | 3       | Measured     |
| rosa_qinglian_xueshi                   | Flower Research Institute, China | 8  | 60.3  | Unknown |      | intersp  | no  | Unknown                     | China       | 3       | Measured     |
| rosa_rapini                            | Loubert rose garden              | 13 | 100.0 |         | 1859 | Sp       | yes | Unknown                     | Middle_East | 4       | Bibliography |
| rosa_reversa                           | Loubert rose garden              | 12 | 95.4  |         | 1820 | Misc_OGR | yes | Unknown                     | EuropeS     | 3       | Measured     |
| rosa_rhodonica                         | Loubert rose garden              | 12 | 100.0 | Unknown |      | Sp       | yes | Unknown                     | Unknown     | Unknown | Unknown      |
| rosa_richardii                         | Loubert rose garden              | 3  | 53.7  | Unknown |      | S        | no  | Unknown                     | Middle_East | 4       | Bibliography |
| rosa_robusta_carmenata                 | Loubert rose garden              | 14 | 63.9  |         | 1923 | intersp  | no  | Preston                     | America     | 4       | Bibliography |
| rosa_rousseauarum                      | Loubert rose garden              | 12 | 100.0 | Unknown |      | Sp       | yes | Unknown                     | America     | 2       | Bibliography |
| rosa_roxburghii_pourpe_ancien          | Loubert rose garden              | 3  | 73.8  |         | 1829 | Misc_OGR | no  | Unknown                     | Unknown     | 4       | Measured     |
| rosa_roxburghii_plena                  | Jardin botanique de la Tête d'Or | 10 | 69.1  |         | 1824 | Sp       | yes | Unknown                     | Asia        | 2       | Bibliography |
| rosa_ruanxianghong                     | Flower Research Institute, China | 6  | 48.3  | Unknown |      | intersp  | no  | Unknown                     | China       | 4       | Measured     |
| rosa_rubiginosa_goldblu.               | Loubert rose garden              | 8  | 60.4  |         | 1954 | Unknown  | no  | Kordes                      | EuropeW     | 5       | Bibliography |
| rosa_rubrifolia_mechlins               | Loubert rose garden              | 14 | 96.0  |         | 1788 | Sp       | yes | Villars                     | EuropeE     | 4       | Bibliography |
| rosa_rubrotincta                       | Loubert rose garden              | 2  | 88.0  |         | 1846 | HEg      | no  | Lee                         | EuropeN     | 5       | Measured     |
| rosa_rubrotincta1                      | Loubert rose garden              | 2  | 88.7  |         | 1846 | HEg      | no  | Lee                         | EuropeN     | 5       | Measured     |
| rosa_rubus                             | Jardin botanique de la Tête d'Or | 10 | 99.2  |         | 1888 | Sp       | yes | Unknown                     | China       | 2       | Bibliography |
| rosa_rugosa                            | Arboretum des Barres             | 12 | 61.5  | Unknown |      | Sp       | yes | Unknown                     | Asia        | 2       | Bibliography |
| rosa_rugosa_germanica                  | Loubert rose garden              | 12 | 99.9  |         | 1890 | HRg      | no  | Müller                      | EuropeW     | 2       | Bibliography |
| rosa_rugosa_scabrosa                   | Loubert rose garden              | 13 | 79.5  |         | 1939 | HRg      | no  | Harkness                    | EuropeN     | 2       | Bibliography |
| rosa_rugotida                          | Loubert rose garden              | 15 | 100.0 |         | 1950 | HRg      | no  | Darthusi Nursery            | EuropeW     | 2       | Bibliography |
| rosa_scabriuscula                      | Loubert rose garden              | 15 | 100.0 |         | 1896 | Sp       | yes | Unknown                     | France      | 5       | Measured     |
| rosa_scabriuscula1                     | Loubert rose garden              | 15 | 100.0 |         | 1896 | Sp       | yes | Unknown                     | France      | 5       | Measured     |
| rosa_sempervirens_prostata             | Jardin botanique de la Tête d'Or | 10 | 99.6  |         | 1824 | Sp       | yes | Noisette                    | EuropeS     | 2       | Bibliography |
| rosa_sericea                           | Jardin botanique de la Tête d'Or | 12 | 87.6  |         | 1822 | Sp       | yes | Unknown                     | Asia        | 2       | Bibliography |
| rosa_sericea_pteracantha               | Jardin botanique de la Tête d'Or | 12 | 50.4  |         | 1890 | Sp       | yes | Delavay                     | China       | 2       | Bibliography |
| rosa_setipoda                          | Jardin botanique de la Tête d'Or | 12 | 99.4  |         | 1895 | Sp       | yes | Unknown                     | China       | 4       | Bibliography |
| rosa_sherardii                         | Loubert rose garden              | 14 | 100.0 | Unknown |      | Sp       | yes | Unknown                     | Europe      | Unknown | Unknown      |
| rosa_simianjing                        | Flower Research Institute, China | 7  | 29.2  | Unknown |      | intersp  | no  | Unknown                     | China       | 3       | Measured     |
| rosa_spectabilis                       | Loubert rose garden              | 10 | 40.8  |         | 1833 | HSem     | no  | Unknown                     | EuropeS     | 2       | Measured     |
| rosa_spherica                          | Loubert rose garden              | 12 | 97.3  |         | 1557 | Sp       | yes | Unknown                     | Europe      | 5       | Bibliography |
| rosa_spathamea                         | Loubert rose garden              | 12 | 99.7  | Unknown |      | Sp       | yes | Unknown                     | America     | 4       | Bibliography |
| rosa_splendens                         | Loubert rose garden              | 10 | 37.2  |         | 1837 | Ayr      | no  | Unknown                     | Unknown     | 2       | Bibliography |
| rosa_stellata                          | Private donations                | 12 | 99.8  |         | 1897 | Sp       | yes | Unknown                     | America     | 2       | Measured     |
| rosa_stylosa                           | Loubert rose garden              | 15 | 100.0 |         | 1838 | Sp       | yes | Unknown                     | EuropeE     | 5       | Measured     |
| rosa_subgallicoides                    | Loubert rose garden              | 10 | 99.3  |         | 1900 | Sp       | yes | Unknown                     | France      | 2       | Measured     |
| rosa_sulphurea                         | Loubert rose garden              | 13 | 100.0 |         | 1516 | Sp       | yes | Unknown                     | Middle_East | 4       | Bibliography |
| rosa_tenuicarpa                        | Val de Marne rose garden         | 10 | 60.1  |         | 1877 | HSem     | no  | Lévêque_de_Vilmorin         | France      | 2       | Bibliography |
| rosa_tomentosa                         | Loubert rose garden              | 15 | 100.0 |         | 1808 | Sp       | yes | Unknown                     | EuropeE     | 5       | Bibliography |
| rosa_uncinella                         | Loubert rose garden              | 15 | 100.0 |         | 1811 | Sp       | yes | Unknown                     | Middle_East | 5       | Measured     |
| rosa_villosa_recondita                 | Loubert rose garden              | 3  | 52.7  |         | 1771 | Sp       | no  | Unknown                     | EuropeE     | 4       | Measured     |
| rosa_violacea                          | Loubert rose garden              | 2  | 93.5  |         | 1795 | HGal     | no  | Unknown                     | EuropeW     | 4       | Bibliography |
| rosa_virginiana                        | Jardin botanique de la Tête d'Or | 12 | 99.9  |         | 1807 | Sp       | yes | Unknown                     | America     | 4       | Bibliography |

|                                   |                                  |    |       |         |      |          |     |                  |               |         |              |
|-----------------------------------|----------------------------------|----|-------|---------|------|----------|-----|------------------|---------------|---------|--------------|
| rosa wichurana                    | Loubert rose garden              | 10 | 98.2  |         | 1891 | Sp       | yes | Unknown          | Asia          | 2       | Measured     |
| rosa willmottiae                  | Arboretum des Barres             | 12 | 89.1  |         | 1904 | Sp       | yes | Unknown          | China         | 2       | Bibliography |
| rosa_woodsii_fendleri             | Loubert rose garden              | 12 | 99.9  |         | 1888 | Sp       | yes | Unknown          | America       | 5       | Measured     |
| rosa_x_borboniana                 | Jardin botanique de la Tête d'Or | 9  | 29.7  |         | 1819 | B        | no  | Unknown          | Africa        | 4       | Bibliography |
| rosa_x_calocarpa                  | Jardin botanique de la Tête d'Or | 7  | 35.4  |         | 1891 | HRg      | no  | Bruant           | FranceAngers  | 2       | Bibliography |
| rosa_x_centifolia                 | Jardin botanique de la Tête d'Or | 1  | 60.8  |         | 1450 | C        | no  | Unknown          | EuropeW       | 4       | Bibliography |
| rosa_x_centifolia_pomponia        | La Cour de Commer rose garden    | 2  | 87.2  |         | 1659 | C        | no  | Unknown          | France        | 4       | Bibliography |
| rosa_x_damasцена                  | Jardin botanique de la Tête d'Or | 4  | 72.3  |         | 1200 | D        | no  | Unknown          | Middle East   | 4       | Bibliography |
| rosa_x_iwara                      | Val de Marne rose garden         | 12 | 83.7  |         | 1830 | HMult    | no  | Unknown          | Asia          | 2       | Bibliography |
| rosa_x_malyi                      | Loubert rose garden              | 12 | 99.9  |         | 1869 | S        | no  | Maly             | EuropeW       | Unknown | Unknown      |
| rosa_x_noisettiana                | Val de Marne rose garden         | 9  | 61.5  |         | 1814 | N        | no  | Noisette         | America       | 2       | Measured     |
| rosa_x_noisettiana_manettii       | Val de Marne rose garden         | 9  | 53.8  |         | 1835 | N        | no  | Manetti          | EuropeS       | Unknown | Unknown      |
| rosa_X_odorata_ochroleuca         | Loubert rose garden              | 10 | 99.5  |         | 1824 | T        | no  | Unknown          | China         | 2       | Bibliography |
| rosa_x_polliniana                 | Jardin botanique de la Tête d'Or | 3  | 75.7  |         | 1800 | Misc_OGR | no  | Unknown          | EuropeS       | 4       | Bibliography |
| rosa_x_wichurana                  | INRA Angers                      | 11 | 66.8  |         | 1891 | Sp       | yes | Unknown          | Asia          | 2       | Measured     |
| rosa_xanthina                     | Jardin botanique de la Tête d'Or | 13 | 100.0 |         | 1906 | Sp       | yes | Meyer            | Asia          | 2       | Bibliography |
| rosa_xanthina_duplex              | Loubert rose garden              | 12 | 57.4  |         | 1906 | Sp       | yes | Meyer            | Asia          | 2       | Bibliography |
| rosa_xanthina_spontanea           | Loubert rose garden              | 12 | 70.7  |         | 1907 | S        | yes | Meyer            | Asia          | Unknown | Unknown      |
| rosa_yijfen                       | Flower Research Institute, China | 9  | 51.2  | Unknown |      | intersp  | no  | Unknown          | China         | 3       | Measured     |
| rosa_yingri_hehua                 | Flower Research Institute, China | 8  | 92.0  | Unknown |      | intersp  | no  | Unknown          | China         | 4       | Measured     |
| rosa_yiping_zhuyi                 | Flower Research Institute, China | 6  | 65.4  | Unknown |      | intersp  | no  | Unknown          | China         | 4       | Measured     |
| rosa_yunzheng_xiawei              | Flower Research Institute, China | 8  | 92.7  | Unknown |      | intersp  | no  | Unknown          | China         | 4       | Measured     |
| rosa_yuzhuang                     | Flower Research Institute, China | 8  | 90.8  | Unknown |      | intersp  | no  | Unknown          | China         | 3       | Measured     |
| rosa_zhongxiang                   | Flower Research Institute, China | 8  | 87.5  | Unknown |      | intersp  | no  | Unknown          | China         | 4       | Measured     |
| rosabelle                         | Val de Marne rose garden         | 9  | 54.6  |         | 1899 | T        | no  | Bruant           | FranceAngers  | 2       | Measured     |
| rose_a_parfum_de_l_hay            | Jardin botanique de la Tête d'Or | 10 | 87.1  |         | 1901 | HRg      | no  | Gravereaux       | FranceParis   | 3       | Bibliography |
| rose_d_herbey_s                   | Grande roseraie de Lyon          | 9  | 74.3  |         | 1902 | T        | no  | Schwartz         | FranceLyon    | 2       | Bibliography |
| rose_de_france                    | Val de Marne rose garden         | 6  | 48.3  |         | 1894 | HP       | no  | Verdier          | FranceParis   | 4       | Bibliography |
| rose_de_meaux_blanc               | Val de Marne rose garden         | 2  | 80.8  |         | 1799 | C        | no  | Unknown          | Unknown       | 4       | Bibliography |
| rose_de_provins                   | Val de Marne rose garden         | 2  | 94.5  |         | 1160 | Sp       | no  | Unknown          | Europe        | 4       | Bibliography |
| rose_edouard                      | Loubert rose garden              | 6  | 69.5  |         | 1820 | B        | no  | Unknown          | Africa        | 4       | Measured     |
| rose_foucheaux                    | Val de Marne rose garden         | 2  | 82.7  |         | 1846 | HGal     | no  | Unknown          | Unknown       | 4       | Bibliography |
| rose_nabonnand                    | Désert rose garden               | 9  | 46.8  |         | 1882 | T        | no  | Nabonnand        | FranceSE      | 2       | Bibliography |
| rosier_d_amour                    | Val de Marne rose garden         | 4  | 71.2  |         | 1880 | HGal     | no  | Crantz           | Unknown       | 4       | Bibliography |
| rosier_des_alpes                  | Loubert rose garden              | 12 | 100.0 |         | 1770 | Sp       | yes | Unknown          | Unknown       | 3       | Measured     |
| rosier_eveque                     | Val de Marne rose garden         | 4  | 55.0  |         | 1797 | HGal     | no  | Unknown          | Unknown       | 4       | Bibliography |
| rosita_mauri                      | Val de Marne rose garden         | 8  | 63.3  |         | 1913 | HT       | no  | Ketten           | EuropeW       | 4       | Bibliography |
| rote_hermosa                      | Loubert rose garden              | 6  | 32.5  |         | 1899 | Ch       | no  | Geissler         | EuropeW       | 4       | Measured     |
| rotkapchen                        | Jumaju rose garden               | 9  | 56.3  |         | 1887 | Pol      | no  | Geschwind        | EuropeW       | Unknown | Unknown      |
| rotrou                            | La Cour de Commer rose garden    | 2  | 91.3  |         | 1848 | M        | no  | Vibert           | FranceAngers  | 4       | Bibliography |
| rouge_adam                        | La Beaujoire rose garden         | 8  | 76.7  |         | 1996 | HT       | no  | Adam             | FranceNW      | 4       | Bibliography |
| roulettii                         | Jumaju rose garden               | 9  | 72.1  |         | 1801 | Ch       | no  | Unknown          | China         | Unknown | Unknown      |
| roxelane                          | Jumaju rose garden               | 3  | 49.0  |         | 1829 | HCh      | no  | Noisette         | FranceParis   | 3       | Measured     |
| royat_mondain                     | Val de Marne rose garden         | 5  | 90.3  |         | 1902 | HP       | no  | Veyssset         | FranceNE      | 4       | Bibliography |
| ruby_queen                        | Val de Marne rose garden         | 8  | 57.8  |         | 1901 | HWich    | no  | Manda            | America       | 2       | Bibliography |
| russell_s_cottage                 | Val de Marne rose garden         | 3  | 57.5  |         | 1826 | HMult    | no  | Vineux           | Unknown       | 2       | Bibliography |
| sachsengruss                      | Jumaju rose garden               | 8  | 54.6  |         | 1912 | HP       | no  | Neubert          | EuropeW       | 4       | Bibliography |
| safrano                           | Grande roseraie de Lyon          | 6  | 61.0  |         | 1839 | T        | no  | Beauregard       | FranceAngers  | 2       | Bibliography |
| salet                             | Loubert rose garden              | 5  | 87.1  |         | 1854 | M        | no  | Lacharme         | FranceLyon    | 4       | Measured     |
| sally_holmes                      | La Beaujoire rose garden         | 8  | 48.4  |         | 1976 | S        | no  | Holmes           | EuropeN       | 2       | Bibliography |
| sanchette                         | La Cour de Commer rose garden    | 2  | 96.0  |         | 1817 | HGal     | no  | Vibert           | FranceParis   | 4       | Bibliography |
| sanders_white                     | Jardin botanique de la Tête d'Or | 10 | 99.1  |         | 1932 | HWich    | no  | Sanders          | EuropeN       | 2       | Bibliography |
| Sanguinea                         | Jumaju rose garden               | 10 | 61.2  |         | 1837 | Ch       | no  | Vibert           | China         | 2       | Bibliography |
| sans_petales                      | La Cour de Commer rose garden    | 4  | 68.4  |         | 1790 | C        | no  | Poilpré          | FranceAngers  | 4       | Bibliography |
| sapho                             | Jumaju rose garden               | 16 | 100.0 |         | 1843 | P        | no  | Vibert           | FranceAngers  | Unknown | Unknown      |
| schneelicht                       | Loubert rose garden              | 12 | 99.9  |         | 1896 | HRg      | no  | Geschwind        | EuropeW       | 2       | Measured     |
| schneewittchen                    | Val de Marne rose garden         | 10 | 95.9  |         | 1901 | Pol      | no  | Lambert          | EuropeW       | 2       | Bibliography |
| seguier                           | Val de Marne rose garden         | 4  | 60.4  |         | 1853 | HGal     | no  | Robert           | FranceAngers  | 4       | Bibliography |
| shailer_s_white_moss              | La Cour de Commer rose garden    | 4  | 72.3  |         | 1788 | M        | no  | Shailer          | EuropeN       | 4       | Bibliography |
| shubin34                          | Flower Research Institute, China | 9  | 64.7  | Unknown |      | Unknown  | no  | Unknown          | China         | Unknown | Unknown      |
| sidonie                           | Loubert rose garden              | 4  | 70.3  |         | 1845 | HP       | no  | Dorisy           | FranceNE      | 4       | Measured     |
| silver_queen                      | Loubert rose garden              | 4  | 41.8  |         | 1886 | HP       | no  | Paul             | EuropeN       | 3       | Measured     |
| single_pink_china                 | Désert rose garden               | 9  | 78.4  | Unknown |      | Ch       | no  | Unknown          | China         | 2       | Bibliography |
| sir_garnet_woiseley               | Val de Marne rose garden         | 6  | 30.6  |         | 1875 | HP       | no  | Cranston         | EuropeN       | 4       | Bibliography |
| sir_joseph_paxton                 | Loubert rose garden              | 6  | 41.0  |         | 1851 | B        | no  | Laffay           | FranceParis   | 4       | Measured     |
| slater_s_crimson_china            | Flower Research Institute, China | 9  | 69.2  |         | 1759 | Ch       | no  | Unknown          | China         | 3       | Measured     |
| sœur_marthe                       | Loubert rose garden              | 2  | 80.1  |         | 1848 | M        | no  | Vibert           | FranceAngers  | 4       | Measured     |
| sofatare                          | Loubert rose garden              | 9  | 70.5  |         | 1843 | N        | no  | Boyau            | FranceAngers  | 2       | Measured     |
| souper_t_notting                  | La Cour de Commer rose garden    | 8  | 88.6  |         | 1874 | M        | no  | Pernet           | FranceLyon    | 4       | Bibliography |
| source_d_or                       | Val de Marne rose garden         | 9  | 56.3  |         | 1912 | LCl      | no  | Turbat           | FranceOrleans | 2       | Bibliography |
| south_orange_perfection           | Val de Marne rose garden         | 9  | 59.6  |         | 1898 | HWich    | no  | Horvath          | America       | 2       | Bibliography |
| souv_d_auguste_riviere            | Val de Marne rose garden         | 5  | 91.5  |         | 1877 | HP       | no  | Verdier          | FranceParis   | 4       | Bibliography |
| souv_de_catherine_guillot         | Désert rose garden               | 9  | 41.5  |         | 1895 | T        | no  | Guillot          | FranceLyon    | Unknown | Unknown      |
| souv_de_francois_gaulain          | Désert rose garden               | 9  | 69.3  |         | 1889 | T        | no  | Guillot          | FranceLyon    | 2       | Bibliography |
| souv_de_germain_de_saint_pierre   | Jardin botanique de la Tête d'Or | 9  | 46.5  |         | 1882 | T        | no  | Nabonnand        | FranceSE      | Unknown | Unknown      |
| souv_de_gilbert_nabonnand         | SCRADH                           | 9  | 75.4  |         | 1920 | T        | no  | Nabonnand        | FranceSE      | 4       | Bibliography |
| souv_de_henry_levyque_de_vilmorin | Val de Marne rose garden         | 8  | 48.6  |         | 1889 | HP       | no  | Lévêque          | FranceParis   | 4       | Bibliography |
| souv_de_j_b_guillot               | Grande roseraie de Lyon          | 9  | 55.2  |         | 1897 | T        | no  | Guillot          | FranceLyon    | Unknown | Unknown      |
| souv_de_la_malmaison              | Loubert rose garden              | 8  | 86.8  |         | 1843 | B        | no  | Béluze           | FranceLyon    | 3       | Bibliography |
| souv_de_la_malmaison_cl           | Loubert rose garden              | 8  | 87.4  |         | 1893 | B        | no  | Bennett          | EuropeN       | 4       | Bibliography |
| souv_de_la_reine_d_angleterre     | Val de Marne rose garden         | 5  | 72.2  |         | 1855 | HP       | no  | Cochet           | FranceParis   | 4       | Bibliography |
| souv_de_mac_kinley                | Jumaju rose garden               | 5  | 58.2  |         | 1893 | HT       | no  | Schwartz         | FranceLyon    | Unknown | Unknown      |
| souv_de_mme_auguste_charles       | Loubert rose garden              | 7  | 41.2  |         | 1866 | B        | no  | Moreau & Robert  | FranceAngers  | 4       | Bibliography |
| souv_de_mme_ladocat               | Val de Marne rose garden         | 6  | 60.0  |         | 1899 | N        | no  | Veyssset         | FranceNE      | 4       | Measured     |
| souv_de_mme_sablayrolles          | Désert rose garden               | 9  | 80.6  |         | 1890 | T        | no  | Bonnaire         | FranceLyon    | 2       | Bibliography |
| souv_de_pierre_sionville          | Private donations                | 8  | 76.7  |         | 1906 | HP       | no  | Boutigny         | FranceNW      | 4       | Bibliography |
| souv_de_pierre_vibert             | La Cour de Commer rose garden    | 2  | 93.8  |         | 1867 | M        | no  | Moreau & Robert  | FranceAngers  | 4       | Bibliography |
| souv_de_victor_landeau            | Val de Marne rose garden         | 8  | 85.3  |         | 1890 | B        | no  | Moreau & Robert  | FranceAngers  | 4       | Bibliography |
| souv_de_yeddo                     | Loubert rose garden              | 10 | 92.3  |         | 1874 | HRg      | no  | Morlet           | FranceNE      | 2       | Bibliography |
| souv_du_comte_de_cavour           | Val de Marne rose garden         | 6  | 46.3  |         | 1861 | HP       | no  | Margottin        | FranceParis   | 4       | Bibliography |
| souv_du_docteur_jamain            | Val de Marne rose garden         | 6  | 37.1  |         | 1865 | HP       | no  | Lacharme         | FranceLyon    | 4       | Bibliography |
| souv_du_rosieriste_rambaux        | Grande roseraie de Lyon          | 9  | 43.3  |         | 1884 | T        | no  | Rambaux          | FranceLyon    | 2       | Bibliography |
| souvenir_alphonse_lavallee        | Jumaju rose garden               | 6  | 37.4  |         | 1884 | HP       | no  | Turc             | France        | Unknown | Unknown      |
| souvenir_de_brod                  | Loubert rose garden              | 5  | 91.7  |         | 1886 | HSet     | no  | Geschwind        | EuropeW       | 4       | Measured     |
| souvenir_de_lucie                 | Loubert rose garden              | 5  | 51.2  |         | 1893 | N        | no  | Schwartz         | FranceLyon    | 4       | Measured     |
| souvenir_de_mme_berthier          | Loubert rose garden              | 6  | 68.9  |         | 1881 | HP       | no  | Berthier         | FranceLyon    | 4       | Measured     |
| souvenir_de_philemon_cochet       | Loubert rose garden              | 12 | 78.0  |         | 1899 | HRg      | no  | Cochet           | FranceParis   | 2       | Measured     |
| souvenir_du_president_carnot      | Loubert rose garden              | 8  | 97.3  |         | 1894 | HT       | no  | Pernet-Ducher    | FranceLyon    | 3       | Measured     |
| souvenir_du_president_carnot      | Loubert rose garden              | 8  | 95.0  |         | 1894 | HT       | no  | Pernet-Ducher    | FranceLyon    | 3       | Bibliography |
| spencer                           | Loubert rose garden              | 5  | 57.0  |         | 1902 | HP       | no  | Paul             | EuropeN       | 3       | Measured     |
| staffa                            | Loubert rose garden              | 13 | 99.3  |         | 1832 | HSpn     | no  | Unknown          | EuropeN       | 4       | Bibliography |
| stanwell_perpetual                | Loubert rose garden              | 12 | 100.0 |         | 1835 | HSpn     | no  | Lee              | EuropeN       | 4       | Bibliography |
| sterckmans                        | Val de Marne rose garden         | 2  | 85.6  |         | 1842 | HGal     | no  | Unknown          | EuropeW       | 4       | Bibliography |
| sunset                            | Désert rose garden               | 8  | 84.2  |         | 1883 | T        | no  | Henderson        | America       | Unknown | Unknown      |
| surpasse_tout                     | Val de Marne rose garden         | 2  | 52.1  |         | 1811 | HGal     | no  | Unknown          | EuropeW       | 4       | Bibliography |
| tausendschon                      | Val de Marne rose garden         | 10 | 83.0  |         | 1906 | HMult    | no  | Kiese            | EuropeW       | 2       | Bibliography |
| tendresse                         | Val de Marne rose garden         | 8  | 83.0  |         | 1980 | HT       | no  | Delbard          | FranceParis   | 4       | Bibliography |
| thalia                            | Val de Marne rose garden         | 10 | 85.3  |         | 1895 | HMult    | no  | Schmitt          | FranceLyon    | 2       | Bibliography |
| the_fairy                         | INRA Angers                      | 10 | 33.7  |         | 1932 | Pol      | no  | Bentall          | EuropeN       | 2       | Measured     |
| the_garland                       | Loubert rose garden              | 10 | 56.1  |         | 1835 | HMult    | no  | Wells            | EuropeN       | 2       | Measured     |
| the_new_century                   | Loubert rose garden              | 12 | 100.0 |         | 1900 | HRg      | no  | Van_Fleet        | America       | Unknown | Unknown      |
| the_wallflower                    | Val de Marne rose garden         | 8  | 31.4  |         | 1901 | HMult    | no  | Paul             | EuropeN       | 2       | Bibliography |
| theano                            | Loubert rose garden              | 10 | 61.3  |         | 1895 | HWich    | no  | Geschwind        | EuropeW       | Unknown | Unknown      |
| thoresbyana                       | Jardin botanique de la Tête d'Or | 10 | 62.0  |         | 1840 | Ayr      | no  | Bennett          | EuropeN       | 2       | Bibliography |
| tian_nu_guang                     | Désert rose garden               | 8  | 72.9  |         | 2008 | T        | no  | Maebara          | Asia          | 2       | Bibliography |
| tiergarten                        | Val de Marne rose garden         | 10 | 87.3  |         | 1904 | HMult    | no  | Lambert          | EuropeW       | 2       | Bibliography |
| tom_wood                          | Loubert rose garden              | 6  | 63.2  |         | 1896 | HP       | no  | Dickson          | EuropeN       | 4       | Bibliography |
| tour_de_malakoff                  | La Cour de Commer rose garden    | 15 | 52.0  |         | 1857 | C        | no  | Souper & Notting | EuropeW       | 4       | Bibliography |
| toussaint_l_ouverture             | Loubert rose garden              | 2  | 84.8  |         | 1849 | B        | no  | Miellez          | FranceNW      | 4       | Measured     |

|                          |                                  |    |       |         |         |    |                  |               |         |              |
|--------------------------|----------------------------------|----|-------|---------|---------|----|------------------|---------------|---------|--------------|
| tricolore                | Jardin botanique de la Tête d'Or | 4  | 69.9  | 1863    | HMult   | no | Moreau & Robert  | FranceAngers  | 2       | Bibliography |
| trier                    | Val de Marne rose garden         | 10 | 91.1  | 1904    | HMult   | no | Lambert          | EuropeW       | 2       | Bibliography |
| triomphe_de_caen         | Loubert rose garden              | 6  | 71.2  | 1861    | HP      | no | Oger             | FranceNW      | 4       | Bibliography |
| triomphe_de_l_exposition | Loubert rose garden              | 5  | 92.4  | 1855    | HP      | no | Margottin        | FranceParis   | 4       | Bibliography |
| triomphe_de_la_duchere   | Jardin botanique de la Tête d'Or | 9  | 44.0  | 1846    | B       | no | Béluze           | FranceParis   | Unknown | Unknown      |
| triomphe_de_pernet_pere  | Val de Marne rose garden         | 8  | 45.9  | 1890    | HT      | no | Pernet           | FranceLyon    | 4       | Bibliography |
| triomphe_des_noisettes   | Loubert rose garden              | 8  | 87.8  | 1887    | N       | no | Pernet           | FranceLyon    | 4       | Measured     |
| turrene                  | Val de Marne rose garden         | 2  | 72.1  | 1846    | HGal    | no | Vibert           | FranceAngers  | 4       | Bibliography |
| tuscany                  | La Cour de Commer rose garden    | 2  | 93.9  | 1820    | HGal    | no | Unknown          | Unknown       | 4       | Bibliography |
| tuscany_superb           | Val de Marne rose garden         | 2  | 88.5  | 1837    | HGal    | no | Rivers           | EuropeN       | 4       | Bibliography |
| ulrich_brunner_fils      | Grande roseraie de Lyon          | 6  | 44.3  | 1881    | HP      | no | Levet            | FranceLyon    | 4       | Bibliography |
| una                      | Loubert rose garden              | 6  | 52.4  | 1898    | S       | no | Paul             | EuropeN       | 4       | Measured     |
| unique_rose              | Val de Marne rose garden         | 2  | 84.9  | 1810    | C       | no | Cels             | FranceParis   | 4       | Bibliography |
| van_artevelde            | La Cour de Commer rose garden    | 2  | 89.9  | 1847    | HGal    | no | Parmentier       | EuropeW       | 4       | Bibliography |
| veilchenblau             | Val de Marne rose garden         | 10 | 37.3  | 1909    | HMult   | no | Schmidt          | EuropeW       | 2       | Bibliography |
| velours_pourpre          | Loubert rose garden              | 15 | 100.0 | 1866    | HGal    | no | Unknown          | EuropeW       | 4       | Bibliography |
| venus                    | La Cour de Commer rose garden    | 4  | 76.5  | 1845    | HGal    | no | Welter           | EuropeW       | 4       | Bibliography |
| vesuvia                  | La Beaujoire rose garden         | 9  | 64.1  | 2001    | S       | no | Noak             | EuropeW       | Unknown | Unknown      |
| vick_s_caprice           | Val de Marne rose garden         | 5  | 70.1  | 1889    | HP      | no | Vick             | America       | 4       | Bibliography |
| vicomtesse_d_avesne      | La Beaujoire rose garden         | 7  | 32.1  | 1847    | N       | no | Roeser           | FranceParis   | 3       | Measured     |
| victor_parmentier        | La Cour de Commer rose garden    | 2  | 87.6  | 1847    | HGal    | no | Parmentier       | EuropeW       | 4       | Bibliography |
| victor_verdier           | Grande roseraie de Lyon          | 5  | 65.4  | 1859    | HP      | no | Lacharme         | FranceLyon    | 4       | Bibliography |
| vierge_de_cley           | La Cour de Commer rose garden    | 2  | 63.2  | 1888    | C       | no | Baron-Veillard   | FranceOrleans | 4       | Bibliography |
| ville_de_bruuxelle       | Loubert rose garden              | 3  | 56.6  | 1836    | D       | no | Vibert           | FranceParis   | 3       | Measured     |
| ville_de_saint_denis     | Loubert rose garden              | 5  | 75.4  | 1853    | HP      | no | Thomas           | FranceNW      | 4       | Bibliography |
| ville_de_toulouse        | Val de Marne rose garden         | 2  | 82.4  | 1876    | HGal    | no | Brassac          | FranceSW      | 4       | Bibliography |
| vinoca                   | Val de Marne rose garden         | 8  | 69.1  | 1906    | HT      | no | Fonseca          | America       | 4       | Bibliography |
| violacee                 | La Cour de Commer rose garden    | 2  | 90.7  | 1876    | M       | no | Souper & Notting | EuropeW       | 4       | Bibliography |
| virago                   | Loubert rose garden              | 5  | 56.9  | 1887    | HSet    | no | Geschwind        | EuropeW       | 4       | Measured     |
| vivid                    | Loubert rose garden              | 4  | 52.8  | 1853    | B       | no | Paul             | EuropeN       | 4       | Measured     |
| waltham_climber_2        | Val de Marne rose garden         | 8  | 39.4  | 1885    | HT      | no | Paul             | EuropeN       | 4       | Bibliography |
| wasily_chludoff          | SCRADH                           | 9  | 38.7  | 1896    | N       | no | Nabonnand        | FranceSE      | 2       | Bibliography |
| white_dorothy_perkins    | Val de Marne rose garden         | 11 | 39.4  | 1908    | HWich   | no | Cant             | EuropeN       | 2       | Bibliography |
| white_scotch             | Val de Marne rose garden         | 13 | 100.0 | 1906    | HSpn    | no | Unknown          | EuropeN       | 4       | Bibliography |
| william_allen_richardson | Val de Marne rose garden         | 9  | 82.9  | 1878    | N       | no | Ducher           | FranceLyon    | 2       | Measured     |
| william_c_egan           | Loubert rose garden              | 6  | 61.5  | 1900    | HWich   | no | Dawson           | America       | 3       | Measured     |
| william_lobb             | La Cour de Commer rose garden    | 16 | 100.0 | 1855    | M       | no | Laffay           | FranceParis   | 4       | Bibliography |
| williams_double_yellow   | Loubert rose garden              | 13 | 100.0 | 1838    | HMult   | no | Williams         | EuropeN       | 3       | Bibliography |
| wodan                    | Loubert rose garden              | 5  | 84.9  | 1890    | HMult   | no | Geschwind        | EuropeW       | 4       | Measured     |
| yuki_s_dream             | Flower Research Institute, China | 7  | 35.7  | Unknown | Unknown | no | Unknown          | China         | Unknown | Unknown      |
| yvonne_rabier            | Val de Marne rose garden         | 9  | 40.6  | 1910    | Pol     | no | Turbat           | FranceOrleans | 2       | Bibliography |
| zaire                    | La Cour de Commer rose garden    | 2  | 91.3  | 1849    | M       | no | Vibert           | FranceAngers  | 4       | Bibliography |
| zephirine_drouhin        | Loubert rose garden              | 6  | 52.9  | 1868    | B       | no | Bizot            | France        | 3       | Bibliography |
| zoe                      | Loubert rose garden              | 2  | 76.3  | 1861    | M       | no | Forest           | France        | 4       | Measured     |

#### Legend

##### Classification

|                          |                             |
|--------------------------|-----------------------------|
| A: Alba                  | HRg: Hybrid Rugosa          |
| Ayr: Ayrshire            | HSem: Hybrid Sempervirens   |
| B: Bourbon               | HSet: Hybrid Setigera       |
| C: Centifolia            | HSpn: Hybrid Spinossissima  |
| Ch: China                | HT: Hybrid Tea              |
| D: Damask                | HWich: Hybrid Wichurana     |
| F: Floribunda            | Intersp: Interspecies       |
| Gr: Grandiflora          | LCI: Large-Flowered Climber |
| HCh: Hybrid              | MiscOGR: Miscellaneous OGR  |
| HEg: Hybrid Eglanteria   | M: Moss                     |
| HFT: Hybrid Foetida      | N: Noisette                 |
| HG: Hybrid Gigantea      | P: Portland                 |
| HGal: Hybrid Gallica     | Pol: Polyantha              |
| HMoy: Hybrid Moyesii     | S: Shrub                    |
| HMSk: Hybrid Musk        | Sp: Species                 |
| HMult: Hybrid Multiflora | T: Tea                      |
| HP: Hybrid Perpetual     |                             |

##### Origin

|                             |
|-----------------------------|
| EuropeE: Europe East        |
| EuropeN: Europe North       |
| EuropeS: Europe South       |
| EuropeW: Europe West        |
| FranceNE: France North East |
| FranceNW: France North West |
| FranceSE: France South East |
| FranceSW: France South West |
